# Supplementary material for: Conformational fingerprinting of allosteric modulators in metabotropic glutamate receptor 2
Source: eLife. 2022 Jul 1;11:e78982. doi: 10.7554/eLife.78982 (PMC9299836; doi:10.7554/eLife.78982)
Supplement: Figure 1—source data 1. [file elife-78982-fig1-data1.xlsx]

## Sheet: Figure 1C
azi-ECL2 - Agonist DRCs
Glutamate
log[Glutamate] (M)	2202020-film1	2202020-film1	2202020-film2	2202020-film2	2202020-film2	2202020-film2	2202020-film2	2202020-film2	2202020-film2	02252021-film1	02252021-film1	02252021-film1	03182021-film1	06092021-film1	06092021-film1		N	Mean	S.E.M.
-7	0	0	0	0	0	0.07971	0.07809	0.06527	0	0	0	0	0	0	0		15	0.01487	0.00799
-6.52288	0.23735	0	0.06239	0.09266	0.08964	0.09239	0.09328	0.12121	0.06683	0.05416	0.03627	0.03125	0.08197	0.10307	0.10192		15	0.08429	0.01374
-5.82391	0.36965	0.19431	0.20067	0.30502	0.2521	0.31522	0.27983	0.32634	0.28162	0.16473	0.27251	0.14731	0.17976	0.214	0.2244		15	0.2485	0.01691
-5.39794	0.55253	0.32227	0.50759	0.61969	0.493	0.61775	0.59002	0.59207	0.52506	0.31631	0.4579	0.34864	0.33125	0.36783	0.38615		15	0.46854	0.02947
-5	0.85214	0.64929	0.84823	0.88417	0.7395	0.88406	0.85683	0.83683	0.77566	0.53022	0.7156	0.62484	0.54267	0.53923	0.57124		15	0.72337	0.03517
-4.82391														--	--		--	--	--
-4.69897										0.65934	0.82816	0.77004	0.6419	0.70553	0.79636		6	0.73356	0.03105
-4.52288	0.89883	0.90521	1.00169	1.00386	0.91597	0.95109	0.98698	0.96737	0.91408	0.7496	0.88069	0.80382	0.76582	0.82645	0.92314		15	0.89964	0.02099
-4.1549	0.92996	0.90995	0.9882	1.00772	0.94398	0.99819	0.99783	0.97669	0.95943	0.8434	0.9078	0.90358	0.87297	0.95108	0.96894		15	0.94398	0.01259
-3	1	1	1	1	1	1	1	1	1	1	1	1	1	1	1		15	1	1.4803e-17
DCG-IV
log[DCG-IV] (M)	02052021-film1	02052021-film1	03262021-film1	03262021-film1	03262021-film1	04202021-film1	04202021-film1	04202021-film1	04202021-film1	04202021-film1	04202021-film1	04202021-film1	04202021-film1	04202021-film1	04202021-film2	04202021-film2	04202021-film2	04202021-film2	04202021-film2	04202021-film2	04202021-film2	04202021-film2	04202021-film2	04202021-film2		N	Mean	S.E.M.
-7.69897	0	0	0	0	0	0	0	0	0	0	0	0	0	0	0	0	0	0	0	0	0	0	0	0		24	0	0
-7.30103	0.06236	0	0	0	0	0	0	0	0	0	0	0	0	0	0	0.06593	0.03977	0.04871	0	0.05862	0.02158	0	0	0		24	0.01237	0.00474
-7	0.11229	0.15796	0	0	0	0	0	0	0	0	0	0	0.02634	0	0	0.08648	0.08086	0.10417	0.11872	0.0836	0.08297	0.0674	0.08253	0.08997		24	0.04555	0.01049
-6.52288	0.23609	0.28045	0.27216	0.28035	0.24386	0.13508	0.09562	0.07669	0.09089	0.11497	0.07144	0.07243	0.12242	0.07584	0.18008	0.29869	0.26423	0.2509	0.34427	0.23357	0.27004	0.1777	0.32165	0.23718		24	0.19778	0.01832
-6.09691	0.35709	0.42929	0.43388	0.44094	0.47749	0.22639	0.15895	0.18413	0.19317	0.17282	0.13249	0.14879	0.24379	0.22727	0.39116	0.49843	0.45333	0.47326	0.53739	0.44361	0.46269	0.34789	0.49546	0.40238		24	0.34717	0.02749
-5.82391	0.42763	0.56755	0.44868	0.49369	0.52231	0.29195	0.26698	0.23958	0.25482	0.31518	0.27929	0.24706	0.33668	0.26483	0.46628	0.57515	0.54986	0.57406	0.62954	0.54433	0.57038	0.47194	0.55048	0.49048		24	0.43245	0.02691
-5.39794	0.51305	0.62711	0.54374	0.56995	0.55486	0.41947	0.41691	0.3992	0.44455	0.48466	0.44805	0.42808	0.49621	0.41712	0.54609	0.58868	0.61022	0.61757	0.68469	0.57319	0.58869	0.55878	0.56536	0.59587		24	0.52884	0.01637
-5	0.53689	0.63804	0.60471	0.62945	0.64547	0.5303	0.48215	0.52869	0.54172	0.51116	0.52581	0.47763	0.55321	0.46285	0.60357	0.62948	0.65853	0.66872	0.6969	0.63879	0.63234	0.60383	0.68365	0.6349		24	0.58828	0.01417
-4.52288	0.61913	0.64655	0.60323	0.66218	0.65591	0.57138	0.53186	0.50965	0.50951	0.59577	0.55819	0.49563	0.58299	0.59032	0.63494	0.64742	0.65085	0.65613	0.6776	0.66404	0.65775	0.64135	0.67424	0.64423		24	0.6117	0.0115
-4	0.63883	0.63883	0.63883	0.63883	0.63883	0.63883	0.63883	0.63883	0.63883	0.63883	0.63883	0.63883	0.63883	0.63883	0.63883	0.63883	0.63883	0.63883	0.63883	0.63883	0.63883	0.63883	0.63883	0.63883		24	0.63883	5.71996e-17
LY379268
log[LY379268] (M)	02282020-film1	02282020-film1	02282020-film1	02282020-film1	02282020-film1	03042021-film1	04142021-film1	04142021-film1	04142021-film1		N	Mean	S.E.M.
-10.699	--	--	--	--	--	0	0	0	0		4	0	0
-10	0	0	0	0	0	0	0	0	0		9	0	0
-9.52288	0.11843	0.11332	0.03381	0.12812	0.07932	0.01661	0	0	0		9	0.0544	0.01839
-8.82391	0.21758	0.23372	0.20665	0.21353	0.16608	0.03873	0.25873	0.17403	0.20163		9	0.19008	0.02111
-8.39794	0.46822	0.3187	0.38008	0.37154	0.37926	0.10118	0.36067	0.26417	0.29919		9	0.327	0.03424
-8	0.66928	0.57367	0.79707	0.80714	0.70894	0.22686	0.56184	0.55904	0.65273		9	0.6174	0.05792
-7.52288	0.9447	0.84988	1.02586	1.04203	0.99648	0.5949	0.83688	1.00015	0.89725		9	0.90979	0.04656
-7.1549	0.96949	0.9207	0.99265	1.05484	1.08324	0.87925	1.10735	1.12451	1.08675		9	1.02431	0.02911
-6	1.07415	1.07651	1.13656	1.0164	1.10307	1.14025	1.14025	1.14025	1.14025		9	1.10752	0.01468
-4.69897	1.14025	1.14025	1.14025	1.14025	1.14025						5	1.14025	0
(2R,4R)-APDC
log[APDC] (M)	06062020-film1	06062020-film1	06062020-film1	06062020-film1	07252020-film1	07252020-film1	07252020-film1	02252021-film1	02252021-film1	02252021-film1	04072021-film1	04072021-film1	04072021-film1		N	Mean	S.E.M.
-7	0	0	0	0	0	0	0	0	0	0	0	0	0		13	0	0
-6.52288	0	0	0	0.0854	0	0	0	0.06181	0.06855	0.07706	0.05649	0.06701	0.10685		13	0.04024	0.01126
-5.82391	0.14904	0.20202	0.23077	0.20962	0.1644	0.1281	0.10682	0.28676	0.38026	0.42367	0.23465	0.22906	0.31979		13	0.23577	0.02638
-5.39794	0.29223	0.47378	0.46594	0.42313	0.33378	0.274	0.23877	0.52227	0.63544	0.70005	0.44378	0.44855	0.58021		13	0.44861	0.03878
-5	0.59614	0.78402	0.88133	0.73756	0.63268	0.56223	0.45868	0.74942	0.83131	0.89716	0.68441	0.67283	0.75236		13	0.71078	0.03532
-4.52288	0.9059	1.02933	0.97804	0.98018	0.82697	0.84334	0.76028	0.95878	0.99344	1.02841	0.88647	0.92377	0.90816		13	0.92485	0.02248
-4.1549	1.04032	1.05579	1.02419	1.00347	1.02624	1.03549	0.94564	1.04617	1.03982	1.08126	1.01521	1.00993	0.94304		13	1.0205	0.01094
-4	1.04617	1.04617	1.04617	1.04617	1.04617	1.04617	1.04617	1.04617	1.04617	1.04617	1.04617	1.04617	1.04617		13	1.04617	0
Data Processing
1) Responses normalized using response to last ligand concentration for each cell
2) Maximal responses normalized to 1mM glutamate

## Sheet: Figure 1D
SNAP-m2 - Agonist DRCs
Glutamate
log[Glutamate] (M)	02192020-film1	02192020-film1	02192020-film1	06262020-film1	06262020-film1	07092020-film1	07092020-film1	10072020-film1	10072020-film1		N	Mean	S.E.M.
-7	0	0	0	0	0	0	0	--			7	0	0
-6.52288	0	0	0	0	0	0	0	--			7	0	0
-6	--	--	--	--	--	--	--	0	0		2	0	0
-5.82391	0	0	-0.05317	-0.08418	-0.08865	-0.03279	0	--	--		7	-0.03697	0.01486
-5.52288	--	--	--	--	--	--	--	-0.17887	-0.15629		2	-0.16758	0.01129
-5.39794	-0.04906	-0.075	-0.17195	-0.31987	-0.31915	-0.11475	-0.06863	-0.26761	-0.26279		9	-0.1832	0.03694
-5	-0.24528	-0.3375	-0.49208	-0.50505	-0.64539	-0.29508	-0.22353	-0.49296	-0.48133		9	-0.41313	0.04764
-4.82391	--	--	--	--	--	-0.52459	-0.35294	-0.69014	-0.64315		4	-0.55271	0.07515
-4.69897	--	--	--	--	--	-0.63934	-0.4902	-0.76056	-0.73721		4	-0.65683	0.06144
-4.52288	-0.81132	-0.825	-0.85973	-0.87542	-0.89894	-0.81967	-0.70588	-0.84507	-0.82988		9	-0.8301	0.01819
-4.1549	-0.9434	-0.9375	-0.95362	-0.9596	-0.95745	-0.95082	-0.92157	-0.94366	-0.90456		9	-0.94135	0.00601
-3	-1	-1	-1	-1	-1	-1	-1	-1	-1		9	-1	0
DCG-IV
log[DCG-IV] (M)	06192020-film1	06192020-film1	07302020-film1	07302020-film1	11192020-film1	11192020-film1		N	Mean	S.E.M.
-7.69897	0	0	0	0	0	0		6	0	0
-7.30103	--	--	-0.09263	-0.06939	-0.03182	0		4	-0.04846	0.02044
-7	-0.15803	-0.10974	-0.16211	-0.13718	-0.07007	-0.07158		6	-0.11812	0.01677
-6.52288	-0.44082	-0.46165	-0.39369	-0.35194	-0.22913	-0.19685		6	-0.34568	0.04494
-6.09691	--	--	-0.62528	-0.58381	-0.46711	-0.44738		4	-0.53089	0.04354
-5.82391	-0.80402	-0.83683	-0.71791	-0.68375	-0.59443	-0.57264		6	-0.7016	0.04377
-5.39794	-0.88719	-0.99799	-0.78738	-0.74182	-0.71944	-0.68001		6	-0.80231	0.04872
-5	-0.93987	-1.02614	-0.81054	-0.74598	-0.77664	-0.7337		6	-0.83881	0.04818
-4.52288	-0.85864	-1.0141	-0.81054	-0.75909	-0.79328	-0.76949		6	-0.83419	0.03874
-4	-0.78738	-0.78738	-0.78738	-0.78738	-0.78738	-0.78738		6	-0.78738	0
LY379268
log[LY379268] (M)	03092020-film	03092020-film	09242020-film1	09242020-film1	09032020-film1	09032020-film1		N	Mean	S.E.M.
-10.699	0	0	0	0	0	0		6	0	0
-10	0	0	0	0	0	-0.03537		6	-0.0059	0.0059
-9.52288	0	0	-0.07656	0	0	-0.02527		6	-0.01697	0.01261
-8.82391	-0.15697	-0.16422	-0.03828	0	-0.04552	-0.04042		6	-0.07424	0.02812
-8.39794	-0.34404	-0.36424	-0.08422	-0.06316	-0.07587	-0.05053		6	-0.16368	0.06047
-8	-0.70528	-0.72006	-0.17609	-0.21054	-0.25796	-0.13643		6	-0.36773	0.11031
-7.52288	-1.07512	-1.07378	-0.39812	-0.40003	-0.64795	-0.42951		6	-0.67075	0.1332
-7.1549	-1.05362	-1.05904	-0.64312	-0.65269	-0.83307	-0.54321		6	-0.79746	0.09032
-6.69897	--	--	-1.01712	--	--	--		1	-1.01712	--
-6	-1.01061	-1.01061	-1.01061	-1.01061	-1.01061	-1.01061		6	-1.01061	0
(2R,4R)-APDC
log[APDC] (M)	03022020-film1	07032020-film1	07032020-film1	07032020-film1	10072020-film1	10072020-film1		N	Mean	S.E.M.
-7.69897	0	0	0	0	0	0		6	0	0
-7	0	0	0	0	0	0		6	0	0
-6.52288	-0.06127	-0.04817	-0.05558	-0.04012	-0.06422	-0.05687		6	-0.05437	0.00362
-6	-0.24116	-0.09633	-0.12968	-0.17141	-0.19267	-0.20472		6	-0.17266	0.02144
-5.39794	-0.55271	-0.32111	-0.42609	-0.46952	-0.59084	-0.57322		6	-0.48891	0.04245
-5	-0.74042	-0.48167	-0.6484	-0.65221	-0.79635	-0.78477		6	-0.68397	0.04802
-4.52288	-0.90728	-0.69039	-0.8707	-0.89899	-0.9248	-0.94513		6	-0.87288	0.0379
-4	-0.96333	-0.96333	-0.96333	-0.96333	-0.96333	-0.96333		6	-0.96333	7.32242e-17
Data Processing
1) Responses normalized using response to last ligand concentration for each cell
2) Maximal responses normalized to 1mM glutamate

## Sheet: Figure 1E
azi-CRD - Agonist DRCs
Glutamate
log[Glutamate] (M)	06262019-film1	06262019-film1	06262019-film1	06262019-film1	06262019-film1	06262019-film1	06262019-film1	06262019-film1	06262019-film1	06262019-film1	04262019-film1	04262019-film1	04262019-film1	04262019-film1	04262019-film1	04192019-film1	04192019-film1	04192019-film1	04192019-film1	04192019-film1	04192019-film1	04192019-film1	04192019-film1	04182019-film1	04182019-film1	04182019-film1		N	Mean	S.E.M.
-7	0	0	0	0	0	0	0	0	0	0	0	0	0	0	0	0	0	0	0	0	0	0	0	0	0	0		26	0	0
-6.52288	0.03558	0.04985	0.02392	0.01916	0.01122	0.00973	0.0222	0.00897	0.02205	0.02159	0.0136	0.06904	0.07588	0.05247	0.01406	0.02737	0.03759	0.03723	0.02568	0.02534	0.02536	0.02312	0.0226	0.03691	0.06957	0.03902		26	0.03151	0.00363
-5.82391	0.09816	0.08798	0.10613	0.09672	0.04745	0.05487	0.07467	0.05919	0.05753	0.10256	0.09942	0.09354	0.07859	0.14243	0.11955	0.08552	0.07769	0.07624	0.06678	0.08382	0.1046	0.08478	0.08814	0.13181	0.18783	0.15122		26	0.09451	0.00625
-5.39794	0.27853	0.31378	0.28401	0.30839	0.18464	0.19292	0.20081	0.17848	0.18408	0.28205	0.20078	0.23831	0.19241	0.26537	0.26301	0.22463	0.21805	0.22163	0.18664	0.22027	0.24406	0.21195	0.22938	0.26186	0.22957	0.18862		26	0.23093	0.00788
-5	0.57055	0.55865	0.5426	0.56387	0.43572	0.49646	0.50353	0.47534	0.43624	0.55331	0.38402	0.44321	0.40379	0.46027	0.44585	0.46636	0.42857	0.49291	0.42808	0.46784	0.48811	0.45857	0.48023	0.47979	0.46087	0.3935		26	0.47378	0.01012
-4.52288	0.86503	0.82698	0.82362	0.86953	0.761	0.81593	0.85671	0.85022	0.75168	0.8556	0.59064	0.73497	0.69919	0.73313	0.74121	0.75485	0.7594	0.75355	0.70034	0.74659	0.76862	0.74759	0.76271	0.76977	0.80174	0.71057		26	0.7712	0.01244
-4.1549	0.98282	0.8871	0.96562	0.93887	0.90595	0.9354	0.94349	0.94888	0.90316	0.93252	0.78752	0.89087	0.88076	0.84558	0.90858	0.90194	0.93233	0.90603	0.86473	0.91423	0.89699	0.92293	0.90169	0.94903	0.93391	0.88618		26	0.91027	0.00781
-3	1	1	1	1	1	1	1	1	1	1	1	1	1	1	1	1	1	1	1	1	1	1	1	1	1	1		26	1	0
DCG-IV
log[DCG-IV] (M)	05032019-film1	11222019-film1	11222019-film1	11222019-film1	11222019-film1	11222019-film1	11222019-film2	11222019-film2	11222019-film2	11222019-film2		N	Mean	S.E.M.
-8	--	0	0	0	0	0	0	0	0	0		9	0	0
-7	0.077	0.04133	0.03979	0.04498	0.06821	0.0568	0.05211	0.0764	0.067	0.08504		10	0.06087	0.00511
-6.52288	0.1375	0.09971	0.126	0.14175	0.16098	0.1227	0.21364	0.20736	0.21356	0.21713		10	0.16403	0.01419
-6	--	0.2443	0.23543	0.1995	0.27284	0.28175	0.38038	0.38743	0.45433	0.49036		9	0.32737	0.03453
-5.82391	0.45651	0.42379	0.34817	0.29926	0.34924	0.35219	0.43248	0.5566	0.53808	0.5555		10	0.43118	0.02992
-5.39794	0.47851	0.60327	0.55707	0.49876	0.52658	0.54305	0.52107	0.5566	0.58624	0.62064		10	0.54918	0.0143
-5	0.65452	0.70797	0.65654	0.59326	0.63572	0.64076	0.62007	0.60571	0.6323	0.69121		10	0.64381	0.01126
-4.52288	0.59401	--	--	--	--	--	--	--	--	--		1	0.59401	--
-4.1549	0.63802	--	--	--	--	--	--	--	--	--		1	0.63802	--
-4	0.69302	0.69302	0.69302	0.69302	0.69302	0.69302	0.69302	0.69302	0.69302	0.69302		10	0.69302	0
LY379268
log[LY379268] (M)	11152019-film1	11152019-film1	11152019-film1	11152019-film1	11152019-film1	11152019-film1	11152019-film1	11152019-film2	11152019-film2	11152019-film2	11152019-film2	11152019-film2	11152019-film2	11152019-film2	11152019-film2	11152019-film2	11152019-film2	11152019-film2	11142019-film1	11142019-film1		N	Mean	S.E.M.
-10	0	0	0	0	0	0	0	0	0	0	0	0	0	0	0	0	0	0	0	0		20	0	0
-9.52288	0.09059	0.0817	0.05772	0.08881	0.05382	0.04437	0.03758	0.0295	0.04686	0.01922	0.03178	0.02461	0.02636	0.01116	0.02919	0.04883	0.02517	0.02876	0.05249	0.01766		20	0.04231	0.00518
-8.82391	0.10934	0.10621	0.04618	0.05328	0.05224	0.1331	0.07516	0.06322	0.05857	0.03319	0.04516	0.05878	0.05798	0.04497	0.07186	0.05127	0.06852	0.0441	0.09263	0.02649		20	0.06461	0.00605
-8.39794	0.18431	0.21242	0.20011	0.22734	0.22794	0.27024	0.2413	0.15595	0.13277	0.09783	0.13047	0.19411	0.21084	0.13025	0.18189	0.18068	0.17892	0.13037	0.30876	0.28901		20	0.19427	0.01261
-8	0.48733	0.51881	0.47334	0.48666	0.55243	0.59022	0.51623	0.39408	0.34949	0.27951	0.32784	0.4511	0.46386	0.39074	0.45359	0.47124	0.52535	0.34893	0.58973	0.66714		20	0.46688	0.02181
-7.52288	0.73411	0.78025	0.78505	0.714	0.87218	0.85104	0.81489	0.87457	0.87859	0.85424	0.89988	0.84614	0.90399	0.87916	0.88697	0.89609	0.89843	0.89533	0.72249	0.80924		20	0.83983	0.01397
-7.1549	0.94029	0.94366	0.90819	0.87385	1.01464	0.94919	0.92565	0.98204	0.99184	0.98177	0.98686	0.95687	0.99624	0.97529	0.9476	0.96934	1.01263	1.01803	--	--		18	0.96522	0.00907
-6	1.06212	1.06212	1.06212	1.06212	1.06212	1.06212	1.06212	1.06212	1.06212	1.06212	1.06212	1.06212	1.06212	1.06212	1.06212	1.06212	1.06212	1.06212	0.97876	1.06212		20	1.05796	0.00417
-4.69897																			1.06212	1.06212		2	1.06212	0
(2R,4R)-APDC
log[APDC] (M)	06062020-film1	06062020-film1	06062020-film1	06062020-film1	06062020-film1	06062020-film1	06292021-film1	06292021-film1	06292021-film1	06292021-film1	06292021-film1	06292021-film1	06292021-film1	06292021-film1	06292021-film1	06292021-film1	06292021-film1	06292021-film1	06292021-film1	06292021-film1	06292021-film1	06292021-film1	06292021-film1	06292021-film1	06292021-film1	06292021-film1	06292021-film1	06292021-film1	06292021-film1	06292021-film1	06292021-film1	06292021-film1	06292021-film1	06292021-film1	06292021-film1	06292021-film1		N	Mean	S.E.M.
-7	0	0	0	0	0	0	0	0	0	0	0	0	0	0	0	0	0	0	0	0	0	0	0	0	0	0	0	0	0	0	0	0	0	0	0	0		36	0	0
-6.52288	0.08641	0.04368	0.05007	0.12828	0.06822	0.07131	0.06811	0.05944	0.06631	0.07204	0.05936	0.07599	0.08875	0	0	0.07791	0.07029	0.0815	0.07567	0.06222	0.08094	0.0787	0.06434	0.07875	0.0899	0.06405	0.12868	0.08138	0.07035	0.08209	0.08663	0.1118	0.08818	0.11668	0.07356	0.06725		36	0.07413	0.00435
-5.82391	0.17959	0.13416	0.12205	0.1691	0.14814	0.14261	0.27429	0.27614	0.28746	0.27991	0.29363	0.34238	0.33612	0.29975	0.34878	0.29736	0.29635	0.30255	0.2917	0.29124	0.30621	0.32532	0.28184	0.30155	0.2696	0.30858	0.34446	0.30677	0.29452	0.29426	0.34016	0.31604	0.29174	0.3085	0.30791	0.29224		36	0.27786	0.01034
-5.39794	0.33885	0.25583	0.27539	0.26239	0.2612	0.32955	0.494	0.51437	0.53461	0.51332	0.53353	0.58252	0.57651	0.52106	0.5659	0.55658	0.51941	0.50014	0.51461	0.52102	0.54286	0.56426	0.52867	0.55474	0.49183	0.5555	0.55773	0.55124	0.50736	0.50879	0.55059	0.58738	0.53077	0.52291	0.55429	0.52133		36	0.49447	0.01633
-5	0.5608	0.48359	0.53514	0.43441	0.46002	0.58008	0.78566	0.77082	0.79275	0.78954	0.78988	0.84734	0.81807	0.79288	0.86169	0.78158	0.76854	0.76484	0.74551	0.76915	0.80473	0.79263	0.75945	0.80696	0.73901	0.82393	0.80537	0.79727	0.78625	0.76035	0.80633	0.74897	0.78552	0.82783	0.78363	0.7962		36	0.74324	0.01858
-4.52288	0.74887	0.72695	0.79176	0.75511	0.73875	0.74197	0.96788	0.95287	0.97766	0.97631	0.97264	1.00148	0.99038	0.95642	0.94133	1.00022	0.94403	0.90833	0.9564	0.9594	0.98275	0.96486	0.97012	0.986	0.94326	0.98738	0.96303	0.95319	0.98781	0.92787	0.98108	0.9787	0.92628	1.0142	0.93499	0.9342		36	0.92901	0.01408
-4.1549	0.93524	0.92038	0.8919	0.91547	0.92978	0.95781	1.01394	0.99901	1.04308	1.01724	1.02953	1.04696	0.99642	1.00873	0.98023	1.0524	0.99546	0.99379	1.02359	1.04065	1.04329	0.99745	1.0289	1.03006	1.01063	1.02014	0.99346	1.01326	1.02508	1.00471	1.01079	1.05067	1.01806	1.03635	1.00603	1.02773		36	1.00301	0.00671
-4	1.02334	1.02334	1.02334	1.02334	1.02334	1.02334	1.02334	1.02334	1.02334	1.02334	1.02334	1.02334	1.02334	1.02334	1.02334	1.02334	1.02334	1.02334	1.02334	1.02334	1.02334	1.02334	1.02334	1.02334	1.02334	1.02334	1.02334	1.02334	1.02334	1.02334	1.02334	1.02334	1.02334	1.02334	1.02334	1.02334		36	1.02334	2.5354e-17
Data Processing
1) Responses normalized using response to last ligand concentration for each cell
2) Maximal responses normalized to 1mM glutamate

## Sheet: Figure 1 - S2A
Normalized Max ΔFRET - orthosteric agonist
SNAP-m2
100μM DCG-IV	03112020-film1	03112020-film1	03112020-film1	03112020-film1	03112020-film1	03112020-film1	03112020-film1	03112020-film1	03112020-film1	08242020-film1	08242020-film1	08242020-film1	08242020-film1	08242020-film1	08242020-film1	08242020-film1	08242020-film1	09232020-film1	09232020-film1	09232020-film1	09232020-film1	09232020-film1	09232020-film1	09232020-film1	09232020-film1		N	Mean	S.E.M.
Max ΔFRET	84.7663	85.075	84.8254	80.7786	86.2145	83.3004	84.7137	86.1165	84.7264	70.8926	74.3888	73.8095	75.8105	75.3951	75.9881	74.211	74.4971	73.9262	75.3591	75.8448	76.6206	81.7136	78.0427	77.2768	74.1653		25	78.7384	0.97536
20μM LY379268	03112020-film1	03112020-film1	03112020-film1	03112020-film1	03112020-film1	03112020-film1	03112020-film1	03112020-film1	03112020-film1	03112020-film1	03112020-film1	08242020-film1	08242020-film1	08242020-film1	08242020-film1	08242020-film1	08242020-film1	08242020-film1	08242020-film1	10142020-film1	10142020-film1	10142020-film1	10142020-film1		N	Mean	S.E.M.
Max ΔFRET	101.316	97.5904	99.6114	101.898	99.6678	97.0197	99.4764	103.592	96.2035	96.5135	105.004	103.487	104.878	105	101.535	99.063	104.983	105.688	105.113	95.3235	97.5216	93.3481	110.579		23	101.061	0.87888
100μM APDC	02192020-film1	02192020-film1	02192020-film1	02192020-film1	02192020-film1	03042020-film1	03042020-film1	03042020-film1	03042020-film1	03042020-film1	03042020-film1	03042020-film1	03042020-film1	03042020-film1		N	Mean	S.E.M.
Max ΔFRET	103.479	102.7	100.974	101.936	101.611	93.0019	94.3775	90.2119	91.2088	93.3266	93.5994	94.2433	93.7977	94.1947		14	96.333	1.24681
azi-CRD
100μM DCG-IV	04182019-film1	04182019-film1	04182019-film1	04182019-film1	04182019-film1	04182019-film1	06072019-film1	06072019-film1	06072019-film1	06072019-film1	06072019-film1	06072019-film1	06072019-film1	06072019-film1	07052019-film1	07052019-film1	07052019-film1	07052019-film1	07052019-film1		N	Mean	S.E.M.
Max ΔFRET	66.2522	71.4032	63.6793	70.615	75.5857	72.6994	71.8894	70.347	63.2035	61.6858	73.7778	67.9245	60.7306	66.4234	71.1688	72.7619	65.6646	79.932	70.9877		19	69.3017	1.14616
20μM LY379268	06072019-film1	06072019-film1	06072019-film1	06072019-film1	06072019-film1	06072019-film1	06072019-film1	06072019-film1	01182022-film1	01182022-film1	01182022-film1	01182022-film1	01182022-film1	01182022-film1	01182022-film1	01182022-film1	01182022-film1	01182022-film1	01182022-film1	01182022-film1	01182022-film1	01182022-film1	01182022-film1	01182022-film1	01182022-film1		N	Mean	S.E.M.
Max ΔFRET	115.668	120.505	100.866	112.261	139.556	107.547	110.959	116.058	104.239	103.911	101.516	105.403	99.0036	103.449	98.7868	98.9594	101.644	100.672	104.151	104.563	100.897	99.5468	105.69	100.311	99.1458		25	106.212	1.8291
100μM APDC	01312020-film1	01312020-film1	01312020-film1	04012021-film1	04012021-film1	04012021-film1	04012021-film1	04012021-film1	04012021-film1	04012021-film1	04012021-film1	04012021-film1	04012021-film1		N	Mean	S.E.M.
Max ΔFRET	105.882	98.2759	99.67	99.937	102.531	104.556	102.893	101.835	104.136	99.2629	105.009	103.1	103.252		13	102.334	0.66364
azi-ECL2
100μM DCG-IV	01152021-film1	01152021-film1	01152021-film1	01152021-film1	01152021-film1	01152021-film1	01202021-film1	01202021-film1	05062021-film1	05062021-film1	05062021-film1	05062021-film1	04222021-film1	04222021-film1	04222021-film1	04222021-film1	04222021-film1	04222021-film1	04222021-film1	04222021-film1	04222021-film1	04222021-film1	04222021-film1	04222021-film1	04222021-film1		N	Mean	S.E.M.
Max ΔFRET	75.6239	63.6013	63.6225	66.6797	61.402	83.697	67.4032	68.3214	74.0066	62.1009	89.9691	84.6273	55.3373	55.3387	55.3355	62.696	49.3687	57.2855	56.6756	56.6982	53.3737	53.7969	61.9848	59.9837	58.1516		25	63.8832	2.09572
20μM LY379268	02202020-film1	02202020-film1	02202020-film1	02202020-film1	02202020-film1	02202020-film1	02202020-film1	05232020-film1	05232020-film1	05232020-film1	05232020-film1	05232020-film1	01142021-film1	01142021-film1	01142021-film1	01142021-film1	01142021-film1	01202021-film1	01202021-film1	01202021-film1	01202021-film1	01282021-film1		N	Mean	S.E.M.
Max ΔFRET	99.4941	111.969	96.0784	99.4565	95.2278	96.5035	99.7613	104.985	106.294	101.689	116.019	109.964	153.783	108.321	139.13	103.259	144.21	129.664	120.816	145.397	122.291	104.239		22	114.025	3.79026
100μM APDC	05232020-film1	05232020-film1	05232020-film1	05232020-film1	05232020-film1	12172020-film1	12172020-film1	12172020-film1	12172020-film1	01152021-film1	05062021-fllm1	05062021-fllm1	05062021-fllm1	05062021-fllm1	05062021-fllm1	05062021-fllm1	05062021-fllm1	05062021-fllm1	05062021-fllm1	03252021-film1	03252021-film1	03252021-film1	03252021-film1	03252021-film1	03252021-film1	03252021-film1	03252021-film1	03252021-film1	03252021-film1	03252021-film1	03252021-film1	03252021-film1	03252021-film1	03252021-film1	03262021-film1	03262021-film1	03262021-film1	03262021-film1	03262021-film1	03262021-film1	03262021-film1	03262021-film1	03262021-film1	03262021-film1	03262021-film1	03262021-film1	03262021-film1	03262021-film1	03262021-film1
Max ΔFRET	103.155	95.8175	105.556	115.075	113.043	108.501	112.473	121.401	108.955	124.54	97.98	106.127	103.704	112.96	104.107	114.749	101.087	103.524	98.0035	100.958	100.687	98.0122	99.7437	102.291	104.334	98.5732	99.6247	100.129	99.0267	97.1557	97.9919	97.79	98.5422	110.917	104.034	105.193	104.73	106.15	100.555	108.623	101.629	102.584	100.219	113.848	106.047	102.069	102.764	103.577	99.0425
Data Processing
1) Maximal responses normalized to 1mM glutamate
[truncated: 10 more columns]

## Sheet: Figure 1 - S3A
Intracellular Ca2+ Response - Agonist DRCs
Glutamate
log[Glutamate] (M)	9252020	9292020	10012020		N	Mean	S.E.M.		Glutamate
-7	0	0	0		3	0	0		Expt.	9252020	9292020	10012020
-6.52288	0	0	0		3	0	0		EC50 (μM)	19.0055	15.2876	14.6464
-5.82391	0	0	0		3	0	0
-5.39794	0	0	0		3	0	0
-5	0.24451	0.26988	0.35364		3	0.28934	0.03297
-4.52288	0.67842	0.73958	0.78568		3	0.73456	0.03107
-4.1549	0.79121	0.82816	0.9296		3	0.84966	0.04137
-3.60206	0.93033	0.85394	1.04234		3	0.9422	0.05471
-3	1	1	1		3	1	7.40149e-17
DCG-IV
log[DCG-IV] (M)	10012020	11152020	11182020		N	Mean	S.E.M.		DCG-IV
-8	0	0	0		3	0	0		Expt.	10012020	11152020	11182020
-7	0	0	0		3	0	0		EC50 (μM)	1.85464	1.22135	0.85224
-6.52288	0	0.09325	0.09534		3	0.06286	0.03144
-6	0.21956	0.3072	0.40112		3	0.3093	0.05242
-5.82391	0.2777	0.36199	0.45674		3	0.36548	0.05171
-5.39794	0.54173	0.58817	0.59618		3	0.57536	0.01697
-5	0.63099	0.63183	0.63319		3	0.632	0.000639703
-4.52288	0.73316	0.6724	0.70691		3	0.70416	0.01759
-4	0.69484	0.69484	0.69484		3	0.69484	3.70074e-17
LY379268
log[LY379268] (M)	9292020	11212020	11242020		N	Mean	S.E.M.		LY379268
-10	0	--	--		1	0	--		Expt.	9292020	11212020	11242020
-9.52288	0	--	0		2	0	0		EC50 (nM)	98.89	71.05	84.9
-8.82391	0	0	0		3	0	0
-8.39794	0	0	0		3	0	0
-8	0	0.02208	0		3	0.00736	0.00736
-7.52288	0.20956	0.17867	0.14414		3	0.17746	0.0189
-7.1549	0.42059	0.51284	0.4328		3	0.45541	0.02893
-6.60206	0.77512	0.93664	0.9375		3	0.88309	0.05398
-6	0.89435	1.05486	1.09294		3	1.01405	0.06085
-5.69897	0.94607	1.04279	1.09429		3	1.02772	0.04345
-5.30103	1.06665	1.00146	1.01804		3	1.02872	0.01956
-5	1.05877	1.05877	1.05877		3	1.05877	6.40988e-17
(2R,4R)-APDC
log[APDC] (M)	11212020	11222020	11242020		N	Mean	S.E.M.		(2R,4R)-APDC
-8	0	0	0		3	0	0		Expt.	11212020	11222020	11242020
-7.69897	0	0	0		3	0	0		EC50 (μM)	8.58499	6.56493	4.48012
-7	0	0	0		3	0	0
-6.52288	0	0	0		3	0	0
-6	0	0	0		3	0	0
-5.39794	0.28252	0.3895	0.50754		3	0.39319	0.06499
-5	0.6253	0.71147	0.84529		3	0.72736	0.064
-4.52288	0.98347	0.9555	0.94828		3	0.96242	0.01073
-4	1.15482	1.08535	1.06785		3	1.10268	0.02656
-3.82391	1.12973	1.12918	1.10507		3	1.12133	0.00813
-3.52288	1.10122	1.10122	1.10122		3	1.10122	0
Data Processing
1) Responses normalized using response to last ligand concentration
2) Maximal responses normalized to 1mM glutamate

## Sheet: Figure 1 - S3B
Normalized Max Intracellular Ca2+ Response - orthosteric agonist
100μM DCG-IV	12052020	12082020	4152021		N	Mean	S.E.M.
	0.68399	0.69184	0.70869		3	0.69484	0.00729
10μM LY379268	12052020	12062020	12102020		N	Mean	S.E.M.
	1.13386	1.07287	0.96957		3	1.05877	0.04795
300μM APDC	12062020	12082020	12102020		N	Mean	S.E.M.
	1.15136	1.19558	0.95673		3	1.10122	0.07337
Data Processing
1) Maximal responses normalized to 1mM glutamate

## Sheet: Figure 1 - S3C
azi-CRD Intracellular Ca2+ Response - Glutamate DRCs
log[Glutamate] (M)	Rep1	Rep2	Rep3		N	Mean	S.E.M.		Glutamate
-6.52288	0	0	0		3	0	0		Expt.	Rep1	Rep2	Rep3
-5.82391	0	0	0		3	0	0		EC50 (μM)	10.3309	23.8704	24.183
-5	0.46953	0	0.25922		3	0.24292	0.13579
-4.52288	0.79981	0.70689	0.54526		3	0.68398	0.07437
-4.1549	1.01628	0.87972	0.75402		3	0.88334	0.07573
-3.60206	0.86765	0.81492	0.87635		3	0.85297	0.01919
-3	1	1	1		3	1	7.40149e-17
Data Processing
1) Responses normalized using response to last ligand concentration
2) Maximal responses normalized to 1mM glutamate

## Sheet: Figure 1 - S3D
azi-ECL2 Intracellular Ca2+ Response - Glutamate DRCs
log[Glutamate] (M)	Rep1	Rep2	Rep3		N	Mean	S.E.M.		Glutamate
-6.52288	0	0	0		3	0	0		Expt.	Rep1	Rep2	Rep3
-5.82391	0	0	0		3	0	0		EC50 (μM)	9.95176	15.0515	15.2142
-5	0.43872	0.40832	0.45285		3	0.43329	0.01314
-4.52288	0.72024	0.60543	0.71495		3	0.68021	0.03742
-4.1549	0.94356	0.87522	0.89955		3	0.90611	0.02
-3.60206	0.6656	0.92172	1.23732		3	0.94154	0.16534
-3	1	1	1		3	1	7.40149e-17
Data Processing
1) Responses normalized using response to last ligand concentration
2) Maximal responses normalized to 1mM glutamate
