# Supplementary material for: Conformational fingerprinting of allosteric modulators in metabotropic glutamate receptor 2
Source: eLife. 2022 Jul 1;11:e78982. doi: 10.7554/eLife.78982 (PMC9299836; doi:10.7554/eLife.78982)
Supplement: Figure 2—source data 1. [file elife-78982-fig2-data1.xlsx]

## Sheet: Figure 2A
SNAP-m2 - PAM DRCs
Glutamate-only
log[Glutamate] (M)	02192020-film1	02192020-film1	02192020-film1	06262020-film1	06262020-film1	07092020-film1	07092020-film1	10072020-film1	10072020-film1		N	Mean	S.E.M.
-7	0	0	0	0	0	0	0	--			7	0	0
-6.52288	0	0	0	0	0	0	0	--			7	0	0
-6	--	--	--	--	--	--	--	0	0		2	0	0
-5.82391	0	0	-0.05317	-0.08418	-0.08865	-0.03279	0	--	--		7	-0.03697	0.01486
-5.52288	--	--	--	--	--	--	--	-0.17887	-0.15629		2	-0.16758	0.01129
-5.39794	-0.04906	-0.075	-0.17195	-0.31987	-0.31915	-0.11475	-0.06863	-0.26761	-0.26279		9	-0.1832	0.03694
-5	-0.24528	-0.3375	-0.49208	-0.50505	-0.64539	-0.29508	-0.22353	-0.49296	-0.48133		9	-0.41313	0.04764
-4.82391	--	--	--	--	--	-0.52459	-0.35294	-0.69014	-0.64315		4	-0.55271	0.07515
-4.69897	--	--	--	--	--	-0.63934	-0.4902	-0.76056	-0.73721		4	-0.65683	0.06144
-4.52288	-0.81132	-0.825	-0.85973	-0.87542	-0.89894	-0.81967	-0.70588	-0.84507	-0.82988		9	-0.8301	0.01819
-4.1549	-0.9434	-0.9375	-0.95362	-0.9596	-0.95745	-0.95082	-0.92157	-0.94366	-0.90456		9	-0.94135	0.00601
-3	-1	-1	-1	-1	-1	-1	-1	-1	-1		9	-1	0
Glutamate + 10μM BINA
log[Glutamate] (M)	08192020-film1	08192020-film1	10142020-film1	10142020-film1	10142020-film1	10142020-film1	05202021-film1	05202021-film1	05202021-film1	05202021-film1	05202021-film1	05202021-film1	05202021-film1	05202021-film1	05202021-film1	05202021-film1	05202021-film1	05202021-film1	05202021-film1	05202021-film1	05202021-film1	05202021-film1	05202021-film1		N	Mean	S.E.M.
-7.69897	0	0	--	--	--	--	0	0	0	0	0	0	0	0	0	0	0	0	0	0	0	0	0		19	0	0
-7.30103	0	-0.02457	--	--	--	--	0	0	0	0	-0.13212	0	0	0	0	0	0	-0.1145	0	0	0	0	0		19	-0.01427	0.00893
-7	-0.0453	0	--	--	--	--	0	0	0	-0.17073	-0.18138	-0.11366	0	0	0	0	0	-0.18743	-0.25049	-0.15792	-0.19492	-0.17025	0		19	-0.07748	0.02113
-6.52288	-0.06795	-0.03041	-0.05296	-0.06597	-0.09807	-0.12078	-0.39361	-0.2233	-0.40595	-0.41494	-0.31851	-0.33382	-0.3365	-0.43059	-0.39842	-0.33089	-0.43018	-0.46161	-0.49693	-0.45663	-0.47886	-0.45975	-0.51555		23	-0.31836	0.03407
-5.82391	-0.38506	-0.2243	-0.19417	-0.32489	-0.41645	-0.50602	-0.87624	-0.701	-0.84445	-0.86951	-0.71272	-0.75837	-0.74742	-0.92446	-0.82199	-0.69771	-0.98899	-0.95184	-0.94994	-0.90099	-0.96224	-1.00954	-0.96418		23	-0.7275	0.05369
-5.39794	-0.70217	-0.59291	-0.30008	-0.58618	-0.67723	-0.74834	-1.06838	-0.89173	-1.048	-1.04554	-0.98259	-1.01741	-1.03099	-1.07854	-0.89603	-0.94098	-1.07361	-1.12859	-1.10977	-1.04097	-1.08845	-0.98914	-1.10154		23	-0.91909	0.0451
-5	-0.9989	-0.93808	-0.60017	-0.87382	-0.91647	-0.94546	-1.09216	-1.01638	-1.03246	-1.09074	-1.06412	-1.09143	-1.11316	-1.13814	-0.9661	-1.06947	-1.13787	-1.15008	-1.14529	-1.06498	-1.14251	-1.02507	-1.18711		23	-1.03478	0.02641
-4.52288	-1.11668	-1.16512	-0.97086	-1.01474	-0.98477	-1.01956	-1.04105	-1.01241	-1.07209	-1.07474	-1.04866	-1.04974	-1.09664	-1.08132	-0.99188	-1.1139	-1.10221	-1.13826	-1.16168	-1.09497	-1.07317	-0.95226	-1.12836		23	-1.06544	0.01252
-4.1549	-1.07818	-1.02743	-1.00616	-1.04068	-0.98705	-1.00129	-1.03333	-1.03578	-1.06977	-1.04487	-0.99535	-1.03806	-1.04231	-1.01245	-0.99204	-1.05034	-1.08368	-1.08946	-1.06088	-1.07694	-1.05107	-1.0704	-1.11648		23	-1.04365	0.00716
-3	-1.02381	-1.02381	-1.02381	-1.02381	-1.02381	-1.02381	-1.02381	-1.02381	-1.02381	-1.02381	-1.02381	-1.02381	-1.02381	-1.02381	-1.02381	-1.02381	-1.02381	-1.02381	-1.02381	-1.02381	-1.02381	-1.02381	-1.02381		23	-1.02381	7.6808e-17
Glutamate + 5μM LY487379
log[Glutamate] (M)	02192020-film1	09152020-film1	09152020-film1	06162021-film1		N	Mean	S.E.M.
-7.69897	0	0	0	0		4	0	0
-7.30103	0	0	0	0		4	0	0
-7	0	0	0	0		4	0	0
-6.52288	-0.05434	0	-0.02048	-0.11316		4	-0.047	0.02474
-5.82391	-0.25812	-0.13604	-0.16385	-0.657		4	-0.30375	0.12061
-5.39794	-0.54341	-0.42325	-0.4506	-0.96191		4	-0.59479	0.12504
-5	-0.91022	-0.74069	-0.83975	-1.13953		4	-0.90755	0.08479
-4.52288	-1.07324	-1.02789	-1.06505	-1.20456		4	-1.09269	0.03857
-4.1549	-1.07324	-1.04301	-1.04457	-1.17258		4	-1.08335	0.03054
-3	-1.07324	-1.07324	-1.07324	-1.07324		4	-1.07324	1.66533e-16
Glutamate + 0.5μM JNJ-42153605
log[Glutamate] (M)	02242020-film1	02242020-film1	02242020-film1	09032020-film1	09032020-film1		N	Mean	S.E.M.
-7.69897	0	0	0	0	0		5	0	0
-7.30103	-0.03839	0	0	0	0		5	-0.00768	0.00768
-7	-0.10236	-0.08845	0	0	0		5	-0.03816	0.02347
-6.52288	-0.28533	-0.26534	-0.1596	0	-0.02884		5	-0.14782	0.05868
-6	--	--	--	-0.07432	-0.0721		2	-0.07321	0.00111
-5.82391	-0.72932	-0.69493	-0.53201	-0.13378	-0.1442		5	-0.44685	0.13004
-5.39794	-0.90845	-0.90973	-0.75811	-0.26757	-0.30281		5	-0.62933	0.14328
-5	-1.01081	-1.01081	-0.91771	-0.52027	-0.54362		5	-0.80065	0.11107
-4.52288	-1.0364	-1.03608	-1.01081	-0.83243	-0.88248		5	-0.95964	0.04271
-4.1549	-1.02617	-1.03608	-0.99751	-0.95135	-0.99495		5	-1.00121	0.01479
-3	-1.01081	-1.01081	-1.01081	-1.01081	-1.01081		5	-1.01081	0
Data Processing
1) Responses normalized using response to last ligand concentration for each cell
2) Maximal responses normalized to 1mM glutamate

## Sheet: Figure 2B
SNAP-m2 - NAM DRCs
Glutamate-only
log[Glutamate] (M)	02192020-film1	02192020-film1	02192020-film1	06262020-film1	06262020-film1	07092020-film1	07092020-film1	10072020-film1	10072020-film1		N	Mean	S.E.M.
-7	0	0	0	0	0	0	0	--			7	0	0
-6.52288	0	0	0	0	0	0	0	--			7	0	0
-6	--	--	--	--	--	--	--	0	0		2	0	0
-5.82391	0	0	-0.05317	-0.08418	-0.08865	-0.03279	0	--	--		7	-0.03697	0.01486
-5.52288	--	--	--	--	--	--	--	-0.17887	-0.15629		2	-0.16758	0.01129
-5.39794	-0.04906	-0.075	-0.17195	-0.31987	-0.31915	-0.11475	-0.06863	-0.26761	-0.26279		9	-0.1832	0.03694
-5	-0.24528	-0.3375	-0.49208	-0.50505	-0.64539	-0.29508	-0.22353	-0.49296	-0.48133		9	-0.41313	0.04764
-4.82391	--	--	--	--	--	-0.52459	-0.35294	-0.69014	-0.64315		4	-0.55271	0.07515
-4.69897	--	--	--	--	--	-0.63934	-0.4902	-0.76056	-0.73721		4	-0.65683	0.06144
-4.52288	-0.81132	-0.825	-0.85973	-0.87542	-0.89894	-0.81967	-0.70588	-0.84507	-0.82988		9	-0.8301	0.01819
-4.1549	-0.9434	-0.9375	-0.95362	-0.9596	-0.95745	-0.95082	-0.92157	-0.94366	-0.90456		9	-0.94135	0.00601
-3	-1	-1	-1	-1	-1	-1	-1	-1	-1		9	-1	0
Glutamate + 10μM MNI-137
log[Glutamate] (M)	08062020-film1	08062020-film1	10152020-film1	10152020-film1		N	Mean	S.E.M.
-7.69897	0	0	0	0		4	0	0
-7	0	0	0	0		4	0	0
-6.52288	0	0	0	0		4	0	0
-5.82391	-0.02947	-0.02849	-0.06331	-0.0472		4	-0.04212	0.00827
-5	-0.1179	-0.24218	-0.37989	-0.28711		4	-0.25677	0.05445
-4.69897	-0.33895	-0.47011	-0.60149	-0.52043		4	-0.48275	0.05504
-4.52288	-0.53053	-0.61257	-0.69646	-0.65305		4	-0.62315	0.03531
-4.1549	-0.75159	-0.78352	-0.79143	-0.7814		4	-0.77699	0.00874
-3	-0.85475	-0.85475	-0.85475	-0.85475		4	-0.85475	0
Glutamate + 10μM Ro 64-5229
log[Glutamate] (M)	08252020-film1	08252020-film1	11112020-film1		N	Mean	S.E.M.
-7.69897	0	0	0		3	0	0
-7	0	0	0		3	0	0
-6.52288	0	0	0		3	0	0
-5.82391	-0.03385	-0.03125	0		3	-0.0217	0.01087
-5.39794	-0.07446	-0.09374	-0.04375		3	-0.07065	0.01456
-5	-0.19123	-0.23435	-0.26248		3	-0.22935	0.02072
-4.69897	-0.39092	-0.42184	-0.5687		3	-0.46049	0.05484
-4.52288	-0.53138	-0.54839	-0.69994		3	-0.59324	0.05358
-4.1549	-0.74462	-0.71869	-0.78743		3	-0.75024	0.02004
-3	-0.87492	-0.87492	-0.87492		3	-0.87492	0
Data Processing
1) Responses normalized using response to last ligand concentration for each cell
2) Maximal responses normalized to 1mM glutamate

## Sheet: Figure 2C
SNAP-m2 - ΔPotency v. ΔEfficacy
Statistics
	N	Mean ΔPotency	S.E.M.	N	Mean ΔEfficacy	S.E.M.
10μM BINA	23	-89.602	3.05149	7	2.38145	0.52591
5μM LY487379	4	-67.8391	7.82115	14	7.32433	1.13889
0.5μM JNJ-42153605	5	-64.9475	16.3636	22	1.08134	1.31775
10μM MNI-137	4	44.8085	23.6726	22	-14.5253	1.62989
10μM Ro 64-5229	3	64.9494	21.9039	35	-12.5077	0.64691
ΔPotency
10μM BINA	5μM LY487379	0.5μM JNJ-42153605	10μM MNI-137	10μM Ro 64-5229
-79.7677	-68.7242	-94.2675	107.044	94.7359
-70.7475	-53.6343	-93.7617	49.8876	77.8756
-33.0648	-59.6197	-86.5118	-5.5826	22.2368
-73.9509	-89.378	-21.5998	27.885
-82.2967		-28.5968
-86.5118
-96.434
-93.229
-96.3317
-96.677
-94.2114
-95.2202
-94.8781
-96.8109
-96.5143
-94.195
-96.9082
-96.7884
-97.4356
-97.0228
-97.2833
-97.3479
-97.2178
ΔPotency = (([modulator + glutamate]EC50 – [glutamate] EC50)/[glutamate] EC50) × 100
Calculated from individual cell responses
ΔEfficacy
10μM BINA	5μM LY487379	0.5μM JNJ-42153605	10μM MNI-137	10μM Ro 64-5229
2.67857	-4.80769	0.91438	-10.7213	-12.8848
0.7326	9.38482	2.05566	-26.7573	-13.8207
0.37383	6.87476	8.51554	-13.8479	-17.1053
4.21053	5.63524	-1.62037	-17.3754	-13.3333
3.01685	8.3575	1.75879	-14.1858	-9.49583
2.26793	11.3883	-2.91807	-21.1325	-8.93371
3.38983	11.1333	2.48736	-12.0197	-14.8838
	8.24042	-0.81376	-12.3419	-14.3665
	13.6041	1.66039	-6.83411	-12.4912
	6.52666	5.10524	-6.21195	-16.4387
	5.91847	2.45301	-2.3686	-12.762
	8.27855	7.24352	-0.30263	-16.7604
	7.05194	4.83181	-3.78978	-15.9786
	4.95428	5.1053	-23.2696	-7.08973
		6.37164	-18.431	-8.89638
		15.314	-18.5097	-9.16097
		-15.3185	-23.731	-5.43144
		-2.94406	-16.2088	-8.27895
		-4.30928	-24.4772	-4.51748
		-5.69722	-17.7281	-4.37717
		-2.05994	-7.52402	-8.21111
		-4.34592	-21.7885	-16.1099
				-17.6074
				-15.9983
				-13.7519
				-13.6581
				-18.0928
				-10.6597
				-9.78199
				-14.7801
				-15.4366
				-12.5419
				-14.818
				-15.9556
				-13.3582
ΔEfficacy = ([1 mM glutamate + modulator] - [1 mM glutamate]) × 100
Calculated from individual cell responses

## Sheet: Figure 2D
azi-CRD - PAM DRCs
Glutamate-only
log[Glutamate] (M)	06262019-film1	06262019-film1	06262019-film1	06262019-film1	06262019-film1	06262019-film1	06262019-film1	06262019-film1	06262019-film1	06262019-film1	04262019-film1	04262019-film1	04262019-film1	04262019-film1	04262019-film1	04192019-film1	04192019-film1	04192019-film1	04192019-film1	04192019-film1	04192019-film1	04192019-film1	04192019-film1	04182019-film1	04182019-film1	04182019-film1		N	Mean	S.E.M.
-7	0	0	0	0	0	0	0	0	0	0	0	0	0	0	0	0	0	0	0	0	0	0	0	0	0	0		26	0	0
-6.52288	0.03558	0.04985	0.02392	0.01916	0.01122	0.00973	0.0222	0.00897	0.02205	0.02159	0.0136	0.06904	0.07588	0.05247	0.01406	0.02737	0.03759	0.03723	0.02568	0.02534	0.02536	0.02312	0.0226	0.03691	0.06957	0.03902		26	0.03151	0.00363
-5.82391	0.09816	0.08798	0.10613	0.09672	0.04745	0.05487	0.07467	0.05919	0.05753	0.10256	0.09942	0.09354	0.07859	0.14243	0.11955	0.08552	0.07769	0.07624	0.06678	0.08382	0.1046	0.08478	0.08814	0.13181	0.18783	0.15122		26	0.09451	0.00625
-5.39794	0.27853	0.31378	0.28401	0.30839	0.18464	0.19292	0.20081	0.17848	0.18408	0.28205	0.20078	0.23831	0.19241	0.26537	0.26301	0.22463	0.21805	0.22163	0.18664	0.22027	0.24406	0.21195	0.22938	0.26186	0.22957	0.18862		26	0.23093	0.00788
-5	0.57055	0.55865	0.5426	0.56387	0.43572	0.49646	0.50353	0.47534	0.43624	0.55331	0.38402	0.44321	0.40379	0.46027	0.44585	0.46636	0.42857	0.49291	0.42808	0.46784	0.48811	0.45857	0.48023	0.47979	0.46087	0.3935		26	0.47378	0.01012
-4.52288	0.86503	0.82698	0.82362	0.86953	0.761	0.81593	0.85671	0.85022	0.75168	0.8556	0.59064	0.73497	0.69919	0.73313	0.74121	0.75485	0.7594	0.75355	0.70034	0.74659	0.76862	0.74759	0.76271	0.76977	0.80174	0.71057		26	0.7712	0.01244
-4.1549	0.98282	0.8871	0.96562	0.93887	0.90595	0.9354	0.94349	0.94888	0.90316	0.93252	0.78752	0.89087	0.88076	0.84558	0.90858	0.90194	0.93233	0.90603	0.86473	0.91423	0.89699	0.92293	0.90169	0.94903	0.93391	0.88618		26	0.91027	0.00781
-3	1	1	1	1	1	1	1	1	1	1	1	1	1	1	1	1	1	1	1	1	1	1	1	1	1	1		26	1	0
Glutamate + 10μM BINA
log[Glutamate] (M)	0131220-film1	0131220-film1	0131220-film1	0131220-film1	0131220-film1	06242021-film1	06242021-film1	06242021-film1	07032021-film1	07032021-film1		N	Mean	S.E.M.
-8	0	0	0	0	0	--	--	--	--	--		5	0	0
-7.69897	--	--	--	--	--	0	0	0	0	0		5	0	0
-7.30103	--	--	--	--	--	0	0	0	0	0		5	0	0
-7	0.09264	0.06782	0.1019	0.07913	0.03854	0	0	0	0	0		10	0.038	0.01369
-6.52288	0.26866	0.23137	0.25033	0.37189	0.2152	0.19071	0	0	0.12395	0.10646		10	0.17586	0.03753
-5.82391	0.79902	0.7719	0.89941	0.94687	0.80939	0.51435	0.39941	0.32309	0.42275	0.44649		10	0.63327	0.07387
-5.39794	1.10705	1.05712	1.1143	1.12358	1.17876	0.70569	0.70215	0.63362	0.61638	0.7078		10	0.89464	0.07499
-5	1.13021	1.14887	1.15196	1.16314	1.14343	0.9008	0.80666	0.82966	0.85605	0.87611		10	1.00069	0.04963
-4.52288	1.16032	1.14887	1.19405	1.16314	1.09846	1.02092	0.93311	0.92596	0.98393	1.03907		10	1.06678	0.03152
-4.1549	1.17421	1.1369	1.20512	1.15523	1.16912	1.08632	0.95598	0.99082	1.11289	1.13004		10	1.11166	0.02545
-3	1.12094	1.12094	1.12094	1.12094	1.12094	1.12094	1.12094	1.12094	1.12094	1.12094		10	1.12094	6.3629e-17
Glutamate + 5μM LY487379
log[Glutamate] (M)	04192019-film1	04192019-film1	04192019-film1	04192019-film1	04192019-film1	04192019-film1	04192019-film1	04192019-film1	04192019-film1	05312019-film1	05312019-film1	05312019-film1	05312019-film1	05312019-film1	06132019-film1	06132019-film1	06132019-film1	06132019-film1	06132019-film1	06142019-film1	06142019-film1	06142019-film1		N	Mean	S.E.M.
-7.69897	--	--	--	--	--	--	--	--	--	0	0	0	0	0	0	0	0	0	0	0	0	0		13	0	0
-7.30103	--	--	--	--	--	--	--	--	--	0.08755	0.08348	0.09584	0.09881	0.05172	--	--	--	--	--	--	--	--		5	0.08348	0.00841
-7	0.1193	0.15377	0.23422	0.27992	0.12516	0.16099	0.16964	0.12696	0.1247	0.1705	0.0742	0.17477	0.06258	0.12498	0	0	0	0	0	0.07545	0.10961	0.14222		22	0.11041	0.01661
-6.52288	0.24536	0.27077	0.26425	0.20528	0.27608	0.25593	0.2953	0.29078	0.28342	0.22349	0.16696	0.20014	0.06917	0.19825	0.16634	0.15329	0.14875	0.11932	0.105	0.2537	0.1694	0.11636		22	0.20352	0.01435
-5.82391	0.82838	0.73877	0.7537	0.65316	0.935	0.92877	0.90475	0.92967	0.86159	0.52302	0.50088	0.389	0.32277	0.46977	0.26074	0.23895	0.35393	0.23423	0.30974	0.22198	0.32884	0.36849		22	0.54801	0.05654
-5.39794	1.30109	1.20009	1.16809	1.08548	1.35464	1.36632	1.34456	1.35559	1.33093	0.89859	0.88735	0.8231	0.74765	0.82317	0.56644	0.5275	0.68734	0.49055	0.50399	0.51796	0.57795	0.77577		22	0.92428	0.07024
-5	1.56446	1.52435	1.44135	1.37785	1.54606	1.57272	1.57389	1.60542	1.58487	1.23037	1.10378	1.19519	1.04078	1.12486	0.83618	0.87015	0.92842	0.83968	0.84523	0.78223	0.92672	1.099		22	1.20971	0.06426
-4.52288	1.61398	1.64803	1.54344	1.47426	1.61968	1.58923	1.57703	1.62589	1.60527	1.45847	1.34494	1.38406	1.28121	1.40069	1.24528	1.12263	1.3439	1.21533	1.23897	1.31077	1.30538	1.53214		22	1.43094	0.03419
-4.1549	1.58472	1.62463	1.50741	1.50848	1.53133	1.55208	1.52991	1.57265	1.59394	--	--	--	--	--	1.4251	1.24436	1.59524	1.42304	1.35447	1.54332	1.39506	1.60971		17	1.50561	0.02522
-3	1.56446	1.56446	1.56446	1.56446	1.56446	1.56446	1.56446	1.56446	1.56446	1.56446	1.56446	1.56446	1.56446	1.56446	1.56446	1.56446	1.56446	1.56446	1.56446	1.56446	1.56446	1.56446		22	1.56446	0
Glutamate + 0.5μM JNJ-42153605
log[Glutamate] (M)	02062020-film1	02062020-film1	02062020-film1	02062020-film1	02062020-film1	02062020-film1	06242021-film1	06242021-film1	07032021-film1	07032021-film1		N	Mean	S.E.M.
-7.69897	--	--	--	--	--	--	0	0	0	0		4	0	0
-7.30103	0.09861	0.06186	0.09055	0.08706	0.17913	0.09942	0	0	0	0		10	0.06166	0.01923
-7	0.16434	0.15465	0.20866	0.1942	0.19224	0.20611	0	0	0	0		10	0.11202	0.03094
-6.52288	0.35827	0.25431	0.35433	0.32143	0.42817	0.42434	0	0	0.04112	0.12391		10	0.23059	0.05484
-5.82391	0.77241	0.52924	0.73228	0.71988	0.87819	0.80504	0.26928	0	0.16678	0.19232		10	0.50654	0.10121
-5.39794	1.09452	0.97943	0.98818	0.92747	1.14907	1.08146	0.52883	0.65522	0.41487	0.36593		10	0.8185	0.09425
-5	1.25557	1.28529	1.16535	1.23551	1.39374	1.3094	0.70389	0.83762	0.84778	0.67669		10	1.07108	0.08638
-4.52288	1.41005	1.41588	1.37794	1.3594	1.62093	1.39426	0.9624	1.12974	1.08522	0.9717		10	1.27275	0.06964
-4.1549	1.42977	1.46743	1.38975	1.40627	1.4986	1.41366	1.3206	1.33336	1.22541	1.31969		10	1.38046	0.02568
-3	1.43306	1.43306	1.43306	1.43306	1.43306	1.43306	1.43306	1.43306	1.43306	1.43306		10	1.43306	2.13663e-17
Data Processing
1) Responses normalized using response to last ligand concentration for each cell
2) Maximal responses normalized to 1mM glutamate

## Sheet: Figure 2E
azi-CRD - NAM DRCs
Glutamate-only
log[Glutamate] (M)	06262019-film1	06262019-film1	06262019-film1	06262019-film1	06262019-film1	06262019-film1	06262019-film1	06262019-film1	06262019-film1	06262019-film1	04262019-film1	04262019-film1	04262019-film1	04262019-film1	04262019-film1	04192019-film1	04192019-film1	04192019-film1	04192019-film1	04192019-film1	04192019-film1	04192019-film1	04192019-film1	04182019-film1	04182019-film1	04182019-film1		N	Mean	S.E.M.
-7	0	0	0	0	0	0	0	0	0	0	0	0	0	0	0	0	0	0	0	0	0	0	0	0	0	0		26	0	0
-6.52288	0.03558	0.04985	0.02392	0.01916	0.01122	0.00973	0.0222	0.00897	0.02205	0.02159	0.0136	0.06904	0.07588	0.05247	0.01406	0.02737	0.03759	0.03723	0.02568	0.02534	0.02536	0.02312	0.0226	0.03691	0.06957	0.03902		26	0.03151	0.00363
-5.82391	0.09816	0.08798	0.10613	0.09672	0.04745	0.05487	0.07467	0.05919	0.05753	0.10256	0.09942	0.09354	0.07859	0.14243	0.11955	0.08552	0.07769	0.07624	0.06678	0.08382	0.1046	0.08478	0.08814	0.13181	0.18783	0.15122		26	0.09451	0.00625
-5.39794	0.27853	0.31378	0.28401	0.30839	0.18464	0.19292	0.20081	0.17848	0.18408	0.28205	0.20078	0.23831	0.19241	0.26537	0.26301	0.22463	0.21805	0.22163	0.18664	0.22027	0.24406	0.21195	0.22938	0.26186	0.22957	0.18862		26	0.23093	0.00788
-5	0.57055	0.55865	0.5426	0.56387	0.43572	0.49646	0.50353	0.47534	0.43624	0.55331	0.38402	0.44321	0.40379	0.46027	0.44585	0.46636	0.42857	0.49291	0.42808	0.46784	0.48811	0.45857	0.48023	0.47979	0.46087	0.3935		26	0.47378	0.01012
-4.52288	0.86503	0.82698	0.82362	0.86953	0.761	0.81593	0.85671	0.85022	0.75168	0.8556	0.59064	0.73497	0.69919	0.73313	0.74121	0.75485	0.7594	0.75355	0.70034	0.74659	0.76862	0.74759	0.76271	0.76977	0.80174	0.71057		26	0.7712	0.01244
-4.1549	0.98282	0.8871	0.96562	0.93887	0.90595	0.9354	0.94349	0.94888	0.90316	0.93252	0.78752	0.89087	0.88076	0.84558	0.90858	0.90194	0.93233	0.90603	0.86473	0.91423	0.89699	0.92293	0.90169	0.94903	0.93391	0.88618		26	0.91027	0.00781
-3	1	1	1	1	1	1	1	1	1	1	1	1	1	1	1	1	1	1	1	1	1	1	1	1	1	1		26	1	0
Glutamate + 10μM MNI-137
log[Glutamate] (M)	04192019-film1	04192019-film1	04192019-film1	04192019-film1	04192019-film1	04192019-film1	04192019-film1	04192019-film1	04192019-film1	04192019-film1	04192019-film1	04192019-film1	04302019-film1	04302019-film1	04302019-film1	04302019-film1	04302019-film1	04302019-film1	04302019-film1	07042019-film1	07042019-film1	07042019-film1	07042019-film1	07052019-film1	07052019-film1	07052019-film1	07052019-film1		N	Mean	S.E.M.
-7	0	0	0	0	0	0	0	0	0	0	0	0	0	0	0	0	0	0	0	0	0	0	0	0	0	0	0		27	0	0
-6.52288	0.0188	0.02051	0.02897	0.03688	0.03138	0.03664	0.02529	0.02295	0.03127	0.01987	0.01609	0.02693	0.05479	0.05033	0.00719	0.0225	0.06219	0.01914	0.02314	0.02647	0.02572	0.05278	0.03127	0.02714	0.04081	0.0402	0.04434		27	0.03124	0.00251
-5.82391	0.04445	0.06632	0.05971	0.05629	0.07113	0.07112	0.06208	0.06258	0.06477	0.05893	0.04553	0.06348	0.04636	0.04299	0.07924	0.06124	0.04784	0.04123	0.06211	0.11856	0.05696	0.08797	0.1273	0.06713	0.0889	0.0871	0.09832		27	0.06813	0.00417
-5.39794	0.1624	0.16923	0.19108	0.17081	0.16946	0.15301	0.16324	0.16599	0.18314	0.1634	0.16462	0.16736	0.12434	0.12374	0.1526	0.20622	0.21168	0.13987	0.17416	0.25094	0.14331	0.19792	0.21664	0.21711	0.25942	0.16527	0.21593		27	0.17862	0.00655
-5	0.40001	0.41163	0.40903	0.38043	0.40587	0.37498	0.39544	0.39728	0.45338	0.39377	0.40804	0.41166	0.32455	0.32192	0.36977	0.38869	0.37671	0.2503	0.35685	0.44086	0.28846	0.37165	0.42658	0.39993	0.4241	0.30821	0.39523		27	0.38094	0.009
-4.52288	0.61199	0.63117	0.65087	0.58036	0.60462	0.60341	0.56098	0.54966	0.60748	0.55449	0.62519	0.59632	0.6607	0.66062	0.60748	0.61615	0.63144	0.58306	0.62114	0.6918	0.45565	0.58937	0.60302	0.65132	0.64417	0.48911	0.57838		27	0.60222	0.00977
-4.1549	0.78122	0.76838	0.7882	0.76281	0.80128	0.77366	0.7518	0.7619	0.79286	0.76343	0.77405	0.7656	0.79242	0.7896	0.72193	0.74488	0.7295	0.73471	0.74903	0.81151	0.64673	0.71472	0.71469	0.74988	0.7797	0.66332	0.73647		27	0.75423	0.00745
-3	0.85986	0.85986	0.85986	0.85986	0.85986	0.85986	0.85986	0.85986	0.85986	0.85986	0.85986	0.85986	0.85986	0.85986	0.85986	0.85986	0.85986	0.85986	0.85986	0.85986	0.85986	0.85986	0.85986	0.85986	0.85986	0.85986	0.85986		27	0.85986	0
Glutamate + 10μM Ro 64-5229
log[Glutamate] (M)	06072019-film1	06072019-film1	06072019-film1	06072019-film1	06072019-film1	06072019-film1	06072019-film1	06072019-film1	06072019-film1	06072019-film1	06072019-film1	06072019-film1	06282019-film1		N	Mean	S.E.M.
-7	--	--	--	--	--	--	--	0	0	0	0	0	0		6	0	0
-6.52288	0.03117	0.0634	0.03617	0.02751	0.02353	0.01178	0.01113	0.04333	0.04124	0.03301	0.02778	0.02217	0.02741		13	0.03074	0.00381
-5.82391	0.04987	0.05654	0.05788	0.05365	0.05774	0.05311	0.05405	0.04746	0.09767	0.10523	0.0682	0.05385	0.04969		13	0.06192	0.00508
-5.39794	0.11845	0.12508	0.10852	0.1183	0.13046	0.09889	0.11916	0.11555	0.13022	0.18983	0.12882	0.12037	0.12851		13	0.12555	0.00592
-5	0.14962	0.21247	0.1682	0.18295	0.18713	0.18312	0.17199	0.29506	0.24091	0.30331	0.26521	0.24548	0.31699		13	0.2248	0.01573
-4.52288	0.33352	0.43521	0.378	0.37553	0.37854	0.41569	0.38206	0.36934	0.41888	0.36109	0.39908	0.41653	0.50718		13	0.39774	0.01195
-4.1549	0.53456	0.55173	0.49737	0.50621	0.51435	0.4926	0.49631	0.46426	0.4905	0.46219	0.52032	0.50839	0.58257		13	0.50934	0.00918
-3	0.58599	0.58599	0.58599	0.58599	0.58599	0.58599	0.58599	0.58599	0.58599	0.58599	0.58599	0.58599	0.58599		13	0.58599	0
Data Processing
1) Responses normalized using response to last ligand concentration for each cell
2) Maximal responses normalized to 1mM glutamate

## Sheet: Figure 2F
azi-CRD - ΔPotency v. ΔEfficacy
Statistics
	N	Mean ΔPotency	S.E.M.	N	Mean ΔEfficacy	S.E.M.
10μM BINA	10	-86.2846	2.62471	9	12.0943	4.5096
5μM LY487379	22	-61.3748	5.61984	19	56.4462	6.6891
0.5μM JNJ-42153605	10	-59.6016	11.6647	8	43.306	8.22097
10μM MNI-137	27	19.3799	5.78663	18	-14.0141	1.81234
10μM Ro 64-5229	13	46.1673	10.3011	18	-41.4006	2.92392
ΔPotency
10μM BINA	5μM LY487379	0.5μM JNJ-42153605	10μM MNI-137	10μM Ro 64-5229
-93.2892	-86.3622	-88.5847	8.09913	111.788
-92.5628	-82.4274	-77.2559	2.04558	54.4953
-93.8686	-82.7128	-86.9416	-1.41359	84.4604
-95.6587	-78.2764	-84.6067	21.9358	80.2661
-92.9779	-89.1123	-88.5847	9.82872	72.5435
-84.725	-88.282	-90.4873	20.2062	46.8592
-80.1033	-87.867	-15.0698	21.9358	72.5435
-74.2586	-88.628	-44.7131	22.8006	26.2598
-75.6122	-87.1232	-29.6276	-4.00797	27.1246
-79.7897	-72.2401	9.8556	22.8006	2.91037
	-70.8565		2.91037	18.4766
	-64.63		8.96393	20.2062
	-55.982		24.5302	-17.7582
	-66.7055		24.5302
	-27.5303		18.4766
	-19.9202		6.36955
	-46.4693		10.6935
	-21.7362		59.9867
	-27.2709		17.6119
	-11.7911		-18.5365
	-36.6107		122.252
	-57.7116		24.5302
			0.316
			-3.14318
			-10.9263
			95.4432
			15.0175
ΔPotency = (([modulator + glutamate]EC50 – [glutamate] EC50)/[glutamate] EC50) × 100
Calculated from individual cell responses
ΔEfficacy
10μM BINA	5μM LY487379	0.5μM JNJ-42153605	10μM MNI-137	10μM Ro 64-5229
23.3716	81.7927	82.2727	-19.4456	-28.0702
17.6357	91.1647	42.4779	-7.38447	-27.0053
26.8405	102.83	50.5102	-10.1516	-21.7759
19.7115	105.34	41.4773	1.62129	-17.8571
27.7937	78.0041	23.5294	-9.31656	-54.2848
0.58394	66.6667	12.5265	-10.1717	-56.1085
-1.20603	72.6804	26.2467	-14.3919	-49.8998
0.44199	69.5464	67.4074	-15.5722	-39.7625
-6.32411	76.2911		-14.8125	-52.6646
	41.9214		-10.0435	-45.8685
	42.0188		-13.9489	-32.6644
	53.8462		-17.5047	-42.4305
	0		-9.85261	-51.9931
	21.4575		-8.07151	-35.5526
	34.4595		-15.0625	-41.2702
	42.2449		-34.4877	-37.27
	30.2041		-19.6812	-50.0412
	33.2258		-23.9757	-60.6915
	28.7834
ΔEfficacy = ([1 mM glutamate + modulator] - [1 mM glutamate]) × 100
Calculated from individual cell responses

## Sheet: Figure 2G
azi-ECL2 - PAM DRCs
Glutamate-only
log[Glutamate] (M)	2202020-film1	2202020-film1	2202020-film2	2202020-film2	2202020-film2	2202020-film2	2202020-film2	2202020-film2	2202020-film2	02252021-film1	02252021-film1	02252021-film1	03182021-film1	06092021-film1	06092021-film1		N	Mean	S.E.M.
-7	0	0	0	0	0	0.07971	0.07809	0.06527	0	0	0	0	0	0	0		15	0.01487	0.00799
-6.52288	0.23735	0	0.06239	0.09266	0.08964	0.09239	0.09328	0.12121	0.06683	0.05416	0.03627	0.03125	0.08197	0.10307	0.10192		15	0.08429	0.01374
-5.82391	0.36965	0.19431	0.20067	0.30502	0.2521	0.31522	0.27983	0.32634	0.28162	0.16473	0.27251	0.14731	0.17976	0.214	0.2244		15	0.2485	0.01691
-5.39794	0.55253	0.32227	0.50759	0.61969	0.493	0.61775	0.59002	0.59207	0.52506	0.31631	0.4579	0.34864	0.33125	0.36783	0.38615		15	0.46854	0.02947
-5	0.85214	0.64929	0.84823	0.88417	0.7395	0.88406	0.85683	0.83683	0.77566	0.53022	0.7156	0.62484	0.54267	0.53923	0.57124		15	0.72337	0.03517
-4.82391														--	--		--	--	--
-4.69897										0.65934	0.82816	0.77004	0.6419	0.70553	0.79636		6	0.73356	0.03105
-4.52288	0.89883	0.90521	1.00169	1.00386	0.91597	0.95109	0.98698	0.96737	0.91408	0.7496	0.88069	0.80382	0.76582	0.82645	0.92314		15	0.89964	0.02099
-4.1549	0.92996	0.90995	0.9882	1.00772	0.94398	0.99819	0.99783	0.97669	0.95943	0.8434	0.9078	0.90358	0.87297	0.95108	0.96894		15	0.94398	0.01259
-3	1	1	1	1	1	1	1	1	1	1	1	1	1	1	1		15	1	1.4803e-17
Glutamate + 10μM BINA
log[Glutamate] (M)	04092021-film1	04092021-film1	04092021-film1	04092021-film1	04092021-film1	04092021-film1	04092021-film1	04092021-film1	04092021-film1	04092021-film1	04092021-film1	04092021-film1	07012021-film1	07012021-film1	07012021-film1	07012021-film1		N	Mean	S.E.M.
-7.69897	0	0	0	0	0	0	0	0	0	0	0	0	0	0	0	0		16	0	0
-7.30103	0	0	0	0	0	0	0	0	0.06663	0	0	0	0	0	0	0		16	0.00416	0.00416
-7	0.0508	0.03606	0.05024	0.04934	0.03199	0.0353	0.0331	0.03263	0.14249	0.03541	0	0	0	0	0	0		16	0.03109	0.00898
-6.52288	0.14796	0.09459	0.23033	0.12822	0.18462	0.08448	0.18811	0.09895	0.26951	0.1412	0.04536	0.07663	0.19096	0.13843	0.11226	0.25468		16	0.14914	0.01638
-5.82391	0.69995	0.74511	0.54541	0.60942	0.55738	0.36266	0.55438	0.37252	0.49713	0.49895	0.50344	0.55792	0.72492	0.72977	0.7037	0.68067		16	0.58396	0.03052
-5.39794	0.85769	0.92375	0.78553	0.87107	0.92505	0.65023	0.78213	0.83008	0.89872	0.85773	0.79741	0.74945	1.10784	1.0568	1.08952	0.98961		16	0.88579	0.03173
-5	1.12009	1.10417	1.10507	1.13245	1.22833	0.97244	1.10223	1.23931	1.06367	1.13911	1.24928	1.02608	1.38484	1.21518	1.27602	1.11946		16	1.15486	0.02597
-4.52288	1.29612	1.40071	1.27853	1.23317	1.31287	1.30644	1.40635	1.28215	1.23474	1.28236	1.63234	1.18561	1.4198	1.3968	1.3914	1.43725		16	1.34354	0.02705
-4.1549	1.51306	1.45886	1.48987	1.33424	1.59222	1.33829	1.4668	1.45354	1.38149	1.41595	1.67362	1.60635	1.49247	1.44564	1.41419	1.42965		16	1.46914	0.02327
-3	1.42134	1.42134	1.42134	1.42134	1.42134	1.42134	1.42134	1.42134	1.42134	1.42134	1.42134	1.42134	1.42134	1.42134	1.42134	1.42134		16	1.42134	2.70709e-16
Glutamate + 5μM LY487379
log[Glutamate] (M)	03062020-film1	03112021-film1	03112021-film1	04082021-film1	04082021-film1	04082021-film1	04082021-film1	04082021-film1	04132021-film1	04132021-film1	04132021-film1	04132021-film1	04132021-film1	04132021-film1	04132021-film1	04132021-film1	04132021-film1	04132021-film1	04132021-film1	04132021-film1	04132021-film1	04132021-film1		N	Mean	S.E.M.
-7.69897	0	0	0	0	0	0	0	0	0	0	0	0	0	0	0	0	0	0	0	0	0	0		22	0	0
-7.30103	0	0	0	0	0	0	0	0	0	0	0	0	0	0	0	0	0	0	0	0	0	0		22	0	0
-7	0	0	0	0	0	0.1244	0	0	0	0	0	0	0	0	0	0	0	0	0	0	0	0		22	0.00565	0.00565
-6.52288	0.32793	0.03774	0	0	0.11009	0.22092	0.10249	0.12248	0	0	0	0	0	0	0.08511	0	0.08867	0	0	0.03977	0	0		22	0.0516	0.01823
-5.82391	0.39352	0.30153	0.32707	0.36578	0.36698	0.46972	0.41927	0.37811	0.33826	0.33894	0.20137	0.2806	0.3561	0.33731	0.38641	0.29759	0.38406	0.46202	0.33731	0.35473	0.34121	0.45055		22	0.35857	0.01309
-5.39794	0.75425	0.61306	0.59467	0.81062	0.67653	0.77645	0.75003	0.60177	0.66409	0.57029	0.60094	0.56513	0.6489	0.62198	0.67964	0.66202	0.66314	0.74797	0.62198	0.65363	0.62511	0.67874		22	0.66277	0.01445
-5	0.9838	1.02298	0.93536	0.95321	0.90949	0.86222	0.92473	0.91775	0.88934	0.82041	0.74649	0.82543	0.88042	0.88555	0.9017	0.88011	0.90368	0.89376	0.88555	0.9214	0.88726	1.01622		22	0.90213	0.01312
-4.52288	1.16417	1.17195	1.13505	1.15005	1.02916	1.12389	1.09709	1.05266	1.02703	0.98183	0.94727	0.94541	0.95512	1.0808	1.01925	1.02477	0.99634	1.0556	1.0808	1.05469	0.90987	1.10584		22	1.05039	0.01599
-4.1549	--	1.2603	1.18573	1.19345	1.16956	1.13462	1.16464	1.19289	1.16858	1.124	1.09076	1.12051	1.11261	1.19178	1.13785	1.20366	1.10728	1.1452	1.19178	1.18336	1.14535	1.18415		21	1.16229	0.00877
-3	1.24615	1.24615	1.24615	1.24615	1.24615	1.24615	1.24615	1.24615	1.24615	1.24615	1.24615	1.24615	1.24615	1.24615	1.24615	1.24615	1.24615	1.24615	1.24615	1.24615	1.24615	1.24615		22	1.24615	1.08026e-16
Glutamate + 0.5μM JNJ-42153605
log[Glutamate] (M)	04062021-film1	04062021-film1	04062021-film1	04092021-film1	04092021-film1	04092021-film1	04092021-film1	04092021-film1	04092021-film1	04092021-film1	04092021-film1	04092021-film1	04092021-film1	04092021-film1	04092021-film1	04092021-film1	04092021-film1		N	Mean	S.E.M.
-7.69897	0	0	0	0	0	0	0	0	0	0	0	0	0	0	0	0	0		17	0	0
-7.30103	0	0	0	0	0	0	0	0	0	0	0	0	0	0	0	0	0		17	0	0
-7	0.02734	0.04873	0.02524	0.01491	0.00292	0.01352	0	0	0	0	0.023	0.01983	0	0	0.01511	0.00767	0.01778		17	0.01271	0.00329
-6.52288	0.13544	0.17426	0.10166	0.1047	0.14883	0.0669	0.04618	0.05236	0.04126	0.07534	0.06777	0.06091	0.03199	0.09426	0.08638	0.05999	0.11285		17	0.08595	0.00965
-6	--	--	--	--	--	--	--	--	--	--	--	--	--	--	--	--	--		--	--	--
-5.82391	0.37197	0.49793	0.49573	0.35529	0.35155	0.36624	0.37234	0.37575	0.38072	0.40614	0.33731	0.41226	0.3874	0.29683	0.35265	0.38221	0.4627		17	0.38853	0.01299
-5.39794	0.70328	0.67565	0.7771	0.6294	0.54495	0.66111	0.59069	0.51016	0.58834	0.77052	0.64618	0.64385	0.63322	0.56753	0.66342	0.60037	0.56184		17	0.63339	0.01773
-5	0.8466	0.77315	0.81031	0.66447	0.70287	0.78485	0.73194	0.76427	0.74672	0.87874	0.79866	0.76106	0.75171	0.79764	0.77463	0.72184	0.72828		17	0.76693	0.01259
-4.52288	0.99663	0.89959	0.88593	0.82351	0.79374	0.87796	0.84901	0.78943	0.80925	0.94764	0.83231	0.84983	0.82441	0.88469	0.8217	0.83406	0.92569		17	0.86149	0.01376
-4.1549	1.04919	1.05202	0.98822	0.89514	0.98748	0.90354	0.93601	0.91584	0.92382	0.97571	0.90679	0.95619	0.85812	0.92015	0.92218	0.89466	0.911		17	0.94094	0.01303
-3	0.98638	0.98638	0.98638	0.98638	0.98638	0.98638	0.98638	0.98638	0.98638	0.98638	0.98638	0.98638	0.98638	0.98638	0.98638	0.98638	0.98638		17	0.98638	1.56759e-16
Data Processing
1) Responses normalized using response to last ligand concentration for each cell
2) Maximal responses normalized to 1mM glutamate

## Sheet: Figure 2H
azi-ECL2 - NAM DRCs
Glutamate-only
log[Glutamate] (M)	2202020-film1	2202020-film1	2202020-film2	2202020-film2	2202020-film2	2202020-film2	2202020-film2	2202020-film2	2202020-film2	02252021-film1	02252021-film1	02252021-film1	03182021-film1	06092021-film1	06092021-film1		N	Mean	S.E.M.
-7	0	0	0	0	0	0.07971	0.07809	0.06527	0	0	0	0	0	0	0		15	0.01487	0.00799
-6.52288	0.23735	0	0.06239	0.09266	0.08964	0.09239	0.09328	0.12121	0.06683	0.05416	0.03627	0.03125	0.08197	0.10307	0.10192		15	0.08429	0.01374
-5.82391	0.36965	0.19431	0.20067	0.30502	0.2521	0.31522	0.27983	0.32634	0.28162	0.16473	0.27251	0.14731	0.17976	0.214	0.2244		15	0.2485	0.01691
-5.39794	0.55253	0.32227	0.50759	0.61969	0.493	0.61775	0.59002	0.59207	0.52506	0.31631	0.4579	0.34864	0.33125	0.36783	0.38615		15	0.46854	0.02947
-5	0.85214	0.64929	0.84823	0.88417	0.7395	0.88406	0.85683	0.83683	0.77566	0.53022	0.7156	0.62484	0.54267	0.53923	0.57124		15	0.72337	0.03517
-4.82391														--	--		--	--	--
-4.69897										0.65934	0.82816	0.77004	0.6419	0.70553	0.79636		6	0.73356	0.03105
-4.52288	0.89883	0.90521	1.00169	1.00386	0.91597	0.95109	0.98698	0.96737	0.91408	0.7496	0.88069	0.80382	0.76582	0.82645	0.92314		15	0.89964	0.02099
-4.1549	0.92996	0.90995	0.9882	1.00772	0.94398	0.99819	0.99783	0.97669	0.95943	0.8434	0.9078	0.90358	0.87297	0.95108	0.96894		15	0.94398	0.01259
-3	1	1	1	1	1	1	1	1	1	1	1	1	1	1	1		15	1	1.4803e-17
Glutamate + 10μM MNI-137
log[Glutamate] (M)	03052021-film1	03052021-film1	03052021-film1	03052021-film1	04142021-film1	04142021-film1	04142021-film1	04142021-film1		N	Mean	S.E.M.
-7.69897	0	0	0	0	0	0	0	0		8	0	0
-7	0	0	0	0	0	0	0	0		8	0	0
-6.52288	0	0	0	0	0	0	0	0		8	0	0
-5.82391	0	0	0	0	0.14577	0	0	0		8	0.01822	0.01822
-5	0.25983	0.21439	0.22178	0.22127	0.49332	0.40329	0.37067	0.32766		8	0.31403	0.03622
-4.69897	0.43787	0.40841	0.40437	0.36356	0.6208	0.53798	0.50344	0.46105		8	0.46718	0.02957
-4.52288	0.5667	0.54186	0.51707	0.51993	0.67967	0.61218	0.63069	0.57871		8	0.58085	0.02015
-4.1549	0.65818	0.63123	0.62198	0.63623	0.77285	0.71865	0.69523	0.69979		8	0.67927	0.01836
-3	0.77914	0.77914	0.77914	0.77914	0.77914	0.77914	0.77914	0.77914		8	0.77914	9.2417e-17
Glutamate + 10μM Ro 64-5229
log[Glutamate] (M)	03182021-film1	03182021-film1	10142021-film1	10142021-film1	10142021-film1		N	Mean	S.E.M.
-7.69897	0	0	--	--	--		2	0	0
-7	0	0	0	0	0		5	0	0
-6.52288	0	0	0	0	0		5	0	0
-5.82391	0.11768	0.11762	0	0	0		5	0.04706	0.02882
-5.39794	0.20637	0.17777	0	0.1593	0.124		5	0.13349	0.03595
-5	0.39839	0.3394	0.33315	0.23832	0.31475		5	0.3248	0.02577
-4.69897	0.57711	0.49906	--	--	--		2	0.53809	0.03902
-4.52288	0.62163	0.55359	0.51611	0.48704	0.51761		5	0.5392	0.02315
-4.1549	0.74397	0.66732	0.58416	0.58022	0.68244		5	0.65162	0.03112
-3	0.83618	0.83618	0.83618	0.83618	0.83618		5	0.83618	0
Data Processing
1) Responses normalized using response to last ligand concentration for each cell
2) Maximal responses normalized to 1mM glutamate

## Sheet: Figure 2I
azi-ECL2 - ΔPotency v. ΔEfficacy
Statistics
	N	Mean ΔPotency	S.E.M.	N	Mean ΔEfficacy	S.E.M.
10μM BINA	16	-51.0252	4.25083	14	42.1338	7.1615
5μM LY487379	22	-30.8994	3.33922	7	24.615	9.3444
0.5μM JNJ-42153605	17	-56.3563	2.04399	13	-1.36214	1.96435
10μM MNI-137	8	179.936	33.8802	58	-22.0861	2.54802
10μM Ro 64-5229	5	238.581	46.0436	8	-16.382	4.79395
ΔPotency
10μM BINA	5μM LY487379	0.5μM JNJ-42153605	10μM MNI-137	10μM Ro 64-5229
-59.4349	-50.558	-56.3361	208.526	105.749
-64.4751	-25.4476	-69.1679	269.842	188.087
-43.9117	-23.8904	-73.0287	265.754	277.044
-59.7874	-47.6382	-52.3819	289.307	382.546
-53.4508	-34.9857	-40.5992	19.9066	239.476
-10.4259	-54.4511	-58.985	99.1307
-42.6395	-47.6382	-50.7357	118.401
-39.4154	-26.0316	-45.7659	168.622
-48.6344	-30.3706	-53.2747
-48.1424	-10.8251	-65.0568
-33.877	8.31349	-56.2788
-32.3399	-4.36815	-59.6269
-71.1589	-31.1486	-60.7335
-70.5942	-23.7197	-44.1256
-70.1728	-38.0027	-58.5158
-67.9438	-24.5685	-54.4905
	-37.4665	-58.9548
	-50.1273
	-23.7197
	-31.7846
	-24.8874
	-46.4706
ΔPotency = (([modulator + glutamate]EC50 – [glutamate] EC50)/[glutamate] EC50) × 100
Calculated from individual cell responses
ΔEfficacy
10μM BINA	5μM LY487379	0.5μM JNJ-42153605	10μM MNI-137	10μM Ro 64-5229
29.3333	52.1008	-2.94118	-19.607	-3.66972
34.3873	4.70588	0.78431	-38.223	-2.77778
67.0103	3.27869	-9.09091	6.37287	-15
45.1311	-3.64372	0.48751	-1.10108	-26.6667
54.8496	40.8403	-2.82775	10.8042	-29.3756
47.8253	19.2658	1.98671	11.3144	-15.3219
100.958	55.7571	-3.4754	16.981	-1.12708
52.7779		-3.28367	22.391	-37.1174
75.0355		-3.41542	23.9929
26.9064		-12.5737	25.2001
8.62072		-5.27766	-26.4041
25.7313		16.4947	-36.3951
7.02605		5.4247	-19.4074
14.2809			-24.3029
			-21.9077
			-23.4332
			-29.9045
			-20.743
			-37.1864
			-49.0148
			-31.3933
			-20.646
			-28.7269
			-31.7919
			-38.1729
			-24.2361
			-33.2217
			-31.277
			-31.3501
			-33.4081
			-42.0781
			-31.4518
			-29.4103
			-35.733
			-23.2605
			-0.29331
			-27.7472
			-25.6297
			-19.5092
			-17.687
			-16.7658
			-17.817
			-22.2955
			-28.2272
			-20.8233
			-25.5033
			-22.2674
			-30.2294
			-25.1982
			-30.8873
			-17.5186
			-20.2307
			-99.0731
			-24.745
			-22.0967
			-10.9705
			-27.6115
			-31.138
ΔEfficacy = ([1 mM glutamate + modulator] - [1 mM glutamate]) × 100
Calculated from individual cell responses

## Sheet: Figure 2J
ΔEfficacy - Each Domain
SNAP-m2 - ΔEfficacy						azi-CRD - ΔEfficacy						azi-ECL2 - ΔEfficacy
Statistics						Statistics						Statistics
	N	Mean ΔEfficacy	S.E.M.				N	Mean ΔEfficacy	S.E.M.				N	Mean ΔEfficacy	S.E.M.
10μM BINA	7	2.38145	0.52591			10μM BINA	9	12.0943	4.5096			10μM BINA	14	42.1338	7.1615
5μM LY487379	14	7.32433	1.13889			5μM LY487379	19	56.4462	6.6891			5μM LY487379	7	24.615	9.3444
0.5μM JNJ-42153605	22	1.08134	1.31775			0.5μM JNJ-42153605	8	43.306	8.22097			0.5μM JNJ-42153605	13	-1.36214	1.96435
10μM MNI-137	22	-14.5253	1.62989			10μM MNI-137	18	-14.0141	1.81234			10μM MNI-137	58	-22.0861	2.54802
10μM Ro 64-5229	35	-12.5077	0.64691			10μM Ro 64-5229	18	-41.4006	2.92392			10μM Ro 64-5229	8	-16.382	4.79395
ΔEfficacy						ΔEfficacy						ΔEfficacy
10μM BINA	5μM LY487379	0.5μM JNJ-42153605	10μM MNI-137	10μM Ro 64-5229		10μM BINA	5μM LY487379	0.5μM JNJ-42153605	10μM MNI-137	10μM Ro 64-5229		10μM BINA	5μM LY487379	0.5μM JNJ-42153605	10μM MNI-137	10μM Ro 64-5229
2.67857	-4.80769	0.91438	-10.7213	-12.8848		23.3716	81.7927	82.2727	-19.4456	-28.0702		29.3333	52.1008	-2.94118	-19.607	-3.66972
0.7326	9.38482	2.05566	-26.7573	-13.8207		17.6357	91.1647	42.4779	-7.38447	-27.0053		34.3873	4.70588	0.78431	-38.223	-2.77778
0.37383	6.87476	8.51554	-13.8479	-17.1053		26.8405	102.83	50.5102	-10.1516	-21.7759		67.0103	3.27869	-9.09091	6.37287	-15
4.21053	5.63524	-1.62037	-17.3754	-13.3333		19.7115	105.34	41.4773	1.62129	-17.8571		45.1311	-3.64372	0.48751	-1.10108	-26.6667
3.01685	8.3575	1.75879	-14.1858	-9.49583		27.7937	78.0041	23.5294	-9.31656	-54.2848		54.8496	40.8403	-2.82775	10.8042	-29.3756
2.26793	11.3883	-2.91807	-21.1325	-8.93371		0.58394	66.6667	12.5265	-10.1717	-56.1085		47.8253	19.2658	1.98671	11.3144	-15.3219
3.38983	11.1333	2.48736	-12.0197	-14.8838		-1.20603	72.6804	26.2467	-14.3919	-49.8998		100.958	55.7571	-3.4754	16.981	-1.12708
	8.24042	-0.81376	-12.3419	-14.3665		0.44199	69.5464	67.4074	-15.5722	-39.7625		52.7779		-3.28367	22.391	-37.1174
	13.6041	1.66039	-6.83411	-12.4912		-6.32411	76.2911		-14.8125	-52.6646		75.0355		-3.41542	23.9929
	6.52666	5.10524	-6.21195	-16.4387			41.9214		-10.0435	-45.8685		26.9064		-12.5737	25.2001
	5.91847	2.45301	-2.3686	-12.762			42.0188		-13.9489	-32.6644		8.62072		-5.27766	-26.4041
	8.27855	7.24352	-0.30263	-16.7604			53.8462		-17.5047	-42.4305		25.7313		16.4947	-36.3951
	7.05194	4.83181	-3.78978	-15.9786			0		-9.85261	-51.9931		7.02605		5.4247	-19.4074
	4.95428	5.1053	-23.2696	-7.08973			21.4575		-8.07151	-35.5526		14.2809			-24.3029
		6.37164	-18.431	-8.89638			34.4595		-15.0625	-41.2702					-21.9077
		15.314	-18.5097	-9.16097			42.2449		-34.4877	-37.27					-23.4332
		-15.3185	-23.731	-5.43144			30.2041		-19.6812	-50.0412					-29.9045
		-2.94406	-16.2088	-8.27895			33.2258		-23.9757	-60.6915					-20.743
		-4.30928	-24.4772	-4.51748			28.7834								-37.1864
		-5.69722	-17.7281	-4.37717		ΔEfficacy = ([1 mM glutamate + modulator] - [1 mM glutamate]) × 100									-49.0148
		-2.05994	-7.52402	-8.21111		Calculated from individual cell responses									-31.3933
		-4.34592	-21.7885	-16.1099											-20.646
				-17.6074											-28.7269
				-15.9983											-31.7919
				-13.7519											-38.1729
				-13.6581											-24.2361
				-18.0928											-33.2217
				-10.6597											-31.277
				-9.78199											-31.3501
				-14.7801											-33.4081
				-15.4366											-42.0781
				-12.5419											-31.4518
				-14.818											-29.4103
				-15.9556											-35.733
				-13.3582											-23.2605
ΔEfficacy = ([1 mM glutamate + modulator] - [1 mM glutamate]) × 100															-0.29331
Calculated from individual cell responses															-27.7472
															-25.6297
															-19.5092
															-17.687
															-16.7658
															-17.817
															-22.2955
															-28.2272
															-20.8233
															-25.5033
															-22.2674
															-30.2294
															-25.1982
															-30.8873
															-17.5186
															-20.2307
															-99.0731
															-24.745
															-22.0967
															-10.9705
															-27.6115
															-31.138
												ΔEfficacy = ([1 mM glutamate + modulator] - [1 mM glutamate]) × 100
												Calculated from individual cell responses

[truncated: 2 more sheets: Figure 2 - S4A, Figure 2 - S4B]
