# Supplementary material for: Conformational fingerprinting of allosteric modulators in metabotropic glutamate receptor 2
Source: eLife. 2022 Jul 1;11:e78982. doi: 10.7554/eLife.78982 (PMC9299836; doi:10.7554/eLife.78982)
Supplement: Figure 3—source data 1. [file elife-78982-fig3-data1.xlsx]

## Sheet: Figure 3B
smFRET Histogram - 0μM Glutamate + GPT/Pyruvate
FRET	Rep #1	Rep #2	Rep #3	N	Mean	S.E.M.
0	0.000241401	0.000100238	0.000218569	3	0.000186736	4.37485e-05
0.02	0.000223855	0.000347116	0.000352703	3	0.000307892	4.20491e-05
0.04	0.000593333	0.00050645	0.000753447	3	0.000617743	7.23388e-05
0.06	0.00109	0.00133	0.00193	3	0.00145	0.000251028
0.08	0.00226	0.00277	0.00278	3	0.0026	0.000172271
0.1	0.0041	0.00324	0.00534	3	0.00423	0.000608552
0.12	0.00653	0.00605	0.0088	3	0.00712	0.000846916
0.14	0.0105	0.01095	0.01371	3	0.01172	0.001
0.16	0.01551	0.0167	0.02116	3	0.01779	0.00172
0.18	0.02236	0.02007	0.02992	3	0.02412	0.00298
0.2	0.0319	0.0301	0.04103	3	0.03434	0.00338
0.22	0.04075	0.03976	0.04905	3	0.04319	0.00294
0.24	0.04958	0.04885	0.06108	3	0.05317	0.00396
0.26	0.05823	0.06122	0.07225	3	0.0639	0.00426
0.28	0.06647	0.0695	0.08051	3	0.07216	0.00427
0.3	0.07526	0.0737	0.08326	3	0.07741	0.00296
0.32	0.0787	0.07549	0.08485	3	0.07968	0.00274
0.34	0.07756	0.07454	0.08124	3	0.07778	0.00194
0.36	0.07606	0.07213	0.0757	3	0.07463	0.00125
0.38	0.06968	0.0655	0.06444	3	0.06654	0.0016
0.4	0.05875	0.05316	0.05349	3	0.05513	0.00181
0.42	0.04887	0.04511	0.0445	3	0.04616	0.00137
0.44	0.03823	0.03751	0.03268	3	0.03614	0.00174
0.46	0.02898	0.02811	0.02367	3	0.02692	0.00165
0.48	0.0221	0.02238	0.01588	3	0.02012	0.00212
0.5	0.01639	0.01659	0.012	3	0.01499	0.0015
0.52	0.01129	0.01346	0.008	3	0.01092	0.00159
0.54	0.00835	0.01205	0.00584	3	0.00875	0.0018
0.56	0.00686	0.01076	0.00455	3	0.00739	0.00181
0.58	0.00521	0.00972	0.00296	3	0.00597	0.00199
0.6	0.00418	0.0082	0.0029	3	0.00509	0.0016
0.62	0.00356	0.00909	0.0019	3	0.00485	0.00217
0.64	0.00351	0.00834	0.00162	3	0.00449	0.002
0.66	0.00315	0.00716	0.00188	3	0.00406	0.00159
0.68	0.003	0.00583	0.00119	3	0.00334	0.00135
0.7	0.00294	0.00624	0.00134	3	0.00351	0.00144
0.72	0.00271	0.00531	0.00114	3	0.00305	0.00122
0.74	0.00332	0.0048	0.000993922	3	0.00304	0.00111
0.76	0.00287	0.00394	0.00108	3	0.00263	0.000833624
0.78	0.00311	0.0037	0.000999815	3	0.00261	0.000820717
0.8	0.00317	0.0023	0.000891188	3	0.00212	0.000662614
0.82	0.00308	0.00248	0.000592728	3	0.00205	0.000748962
0.84	0.00314	0.00223	0.000515966	3	0.00196	0.000770026
0.86	0.00277	0.00179	0.000378484	3	0.00164	0.000693044
0.88	0.00392	0.00107	0.000236884	3	0.00174	0.00112
0.9	0.00394	0.00116	0.000231232	3	0.00178	0.00111
0.92	0.00354	0.00111	9.47814e-05	3	0.00158	0.00102
0.94	0.0033	0.00124	2.6259e-05	3	0.00152	0.000955527
0.96	0.00273	0.000695926	3.6582e-05	3	0.00115	0.000810326
0.98	0.00242	0.000585346	0	3	0.001	0.000729741
1	0.00143	0.000629426	0	3	0.000686328	0.000413658
1.02	0.000699317	0.000173007	0	3	0.000290775	0.000210288
1.04	0.000470071	0.000112239	0	3	0.000194103	0.000141737
1.06	0.00020808	0	0	3	6.93602e-05	6.93602e-05
1.08	8.47932e-05	1.0423e-05	0	3	3.17387e-05	2.66973e-05
1.1	5.87983e-05	7.18597e-05	0	3	4.35527e-05	2.21004e-05
1.12	3.23443e-05	0	0	3	1.07814e-05	1.07814e-05
1.14	1.07814e-05	0	0	3	3.59381e-06	3.59381e-06
1.16	1.07814e-05	0	0	3	3.59381e-06	3.59381e-06
1.18	0	0	0	3	0	0
1.2	7.60803e-06	0	0	3	2.53601e-06	2.53601e-06

## Sheet: Figure 3C
smFRET Histogram - 15μM Glutamate
FRET	Rep #1	Rep #2	Rep #3	N	Mean	S.E.M.
0	0.000246315	0.000155161	4.80849e-05	3	0.000149854	5.72857e-05
0.02	0.000160919	4.05727e-05	0.000148626	3	0.000116706	3.82315e-05
0.04	0.000362335	0.000197136	0.00020658	3	0.00025535	5.35618e-05
0.06	0.000330212	0.000231985	0.000257883	3	0.00027336	2.93927e-05
0.08	0.000459275	0.000622566	0.000616132	3	0.000565991	5.33904e-05
0.1	0.000966998	0.00112	0.00115	3	0.00108	5.59118e-05
0.12	0.00164	0.001	0.00176	3	0.00147	0.00023547
0.14	0.0021	0.00206	0.00302	3	0.00239	0.000311497
0.16	0.00327	0.0024	0.00457	3	0.00341	0.000629108
0.18	0.00404	0.00377	0.00636	3	0.00472	0.000824655
0.2	0.0047	0.00501	0.0096	3	0.00644	0.00159
0.22	0.00729	0.007	0.01319	3	0.00916	0.00202
0.24	0.00842	0.00773	0.01698	3	0.01104	0.00298
0.26	0.01006	0.00887	0.02073	3	0.01322	0.00377
0.28	0.012	0.01019	0.02693	3	0.01637	0.00531
0.3	0.0138	0.01136	0.03096	3	0.01871	0.00617
0.32	0.0148	0.01116	0.03604	3	0.02067	0.00776
0.34	0.01613	0.01272	0.04028	3	0.02304	0.00867
0.36	0.01709	0.01288	0.03887	3	0.02295	0.00805
0.38	0.01659	0.0132	0.03759	3	0.02246	0.00763
0.4	0.0152	0.01248	0.03473	3	0.0208	0.00701
0.42	0.01437	0.01245	0.03125	3	0.01936	0.00597
0.44	0.0129	0.01202	0.02693	3	0.01728	0.00483
0.46	0.01192	0.01186	0.02315	3	0.01564	0.00375
0.48	0.01039	0.01209	0.02072	3	0.0144	0.0032
0.5	0.01032	0.01175	0.0163	3	0.01279	0.0018
0.52	0.0096	0.01314	0.01542	3	0.01272	0.00169
0.54	0.01033	0.01239	0.01457	3	0.01243	0.00122
0.56	0.01067	0.01313	0.01291	3	0.01224	0.000784983
0.58	0.01198	0.01256	0.01454	3	0.01303	0.000775202
0.6	0.01417	0.01491	0.01505	3	0.01471	0.000273464
0.62	0.01577	0.01703	0.01592	3	0.01624	0.000398546
0.64	0.0173	0.01881	0.01816	3	0.01809	0.000437441
0.66	0.01914	0.02025	0.02039	3	0.01993	0.000392887
0.68	0.02458	0.02364	0.02091	3	0.02305	0.0011
0.7	0.0279	0.02639	0.02451	3	0.02627	0.00097939
0.72	0.03101	0.0301	0.02651	3	0.0292	0.00137
0.74	0.03579	0.03457	0.02933	3	0.03323	0.00198
0.76	0.03868	0.03742	0.03195	3	0.03602	0.00206
0.78	0.04351	0.04637	0.03272	3	0.04087	0.00416
0.8	0.04615	0.04735	0.03349	3	0.04233	0.00443
0.82	0.05107	0.05096	0.03555	3	0.04586	0.00515
0.84	0.05065	0.05508	0.03509	3	0.04694	0.00606
0.86	0.05288	0.05413	0.03232	3	0.04644	0.00707
0.88	0.05123	0.0546	0.02966	3	0.04516	0.00781
0.9	0.04844	0.05176	0.02477	3	0.04165	0.0085
0.92	0.04396	0.04653	0.02062	3	0.03704	0.00824
0.94	0.03701	0.03857	0.01638	3	0.03065	0.00715
0.96	0.03083	0.03218	0.01386	3	0.02562	0.0059
0.98	0.02272	0.0238	0.00906	3	0.01853	0.00474
1	0.01713	0.0163	0.00575	3	0.01306	0.00366
1.02	0.01068	0.00976	0.00331	3	0.00792	0.00232
1.04	0.0063	0.00561	0.00189	3	0.0046	0.00137
1.06	0.00396	0.00327	0.00133	3	0.00285	0.00078652
1.08	0.00236	0.0022	0.000723137	3	0.00176	0.000521723
1.1	0.00134	0.00115	0.000336535	3	0.000942648	0.000308315
1.12	0.001	0.000855162	0.000273093	3	0.000710469	0.000222821
1.14	0.000692211	0.00033992	0.000102136	3	0.000378089	0.000171406
1.16	0.000526488	0.00025831	5.47725e-05	3	0.000279857	0.000136598
1.18	0.000243495	3.59234e-05	2.24862e-05	3	0.000100635	7.15353e-05
1.2	0.000837589	0.000249197	0.000100641	3	0.000395809	0.000225014

## Sheet: Figure 3D
smFRET Histogram - 1000μM Glutamate
FRET	Rep #1	Rep #2	Rep #3	N	Mean	S.E.M.
0	0.000183626	0.000157077	6.82221e-05	3	0.000136308	3.4895e-05
0.02	7.08511e-05	0.000132757	0	3	6.78695e-05	3.83527e-05
0.04	0.000201843	0.000148113	0.000288167	3	0.000212707	4.07934e-05
0.06	0.000188366	0.000350667	0.000378788	3	0.00030594	5.93449e-05
0.08	0.000171946	0.000522027	0.000606061	3	0.000433344	0.000132931
0.1	0.000432209	0.000547364	0.00114	3	0.000705312	0.000218074
0.12	0.000752736	0.000982375	0.000940258	3	0.000891789	7.05819e-05
0.14	0.000702393	0.00121	0.00127	3	0.00106	0.000180656
0.16	0.0012	0.00102	0.0027	3	0.00164	0.00052967
0.18	0.0012	0.00154	0.00225	3	0.00166	0.000309271
0.2	0.00238	0.00221	0.00216	3	0.00225	6.68764e-05
0.22	0.00299	0.00186	0.00243	3	0.00243	0.000328598
0.24	0.00335	0.0016	0.00335	3	0.00277	0.000582964
0.26	0.00466	0.00222	0.00235	3	0.00308	0.000794254
0.28	0.0056	0.00341	0.00346	3	0.00415	0.000721858
0.3	0.00648	0.0027	0.0026	3	0.00392	0.00128
0.32	0.00746	0.00308	0.00265	3	0.0044	0.00154
0.34	0.00618	0.00352	0.0034	3	0.00437	0.000907806
0.36	0.00656	0.004	0.00296	3	0.0045	0.00107
0.38	0.00663	0.00511	0.00282	3	0.00485	0.00111
0.4	0.00645	0.00509	0.00383	3	0.00513	0.000758464
0.42	0.00706	0.0056	0.00338	3	0.00535	0.00107
0.44	0.0064	0.00746	0.00433	3	0.00606	0.000920059
0.46	0.00676	0.00816	0.00543	3	0.00678	0.000787326
0.48	0.00631	0.00916	0.00617	3	0.00721	0.000974002
0.5	0.00688	0.00934	0.00798	3	0.00807	0.000712365
0.52	0.0079	0.01075	0.00778	3	0.00881	0.000972494
0.54	0.00822	0.01225	0.00917	3	0.00988	0.00121
0.56	0.00922	0.01202	0.01056	3	0.0106	0.000808459
0.58	0.01086	0.01441	0.01125	3	0.01217	0.00112
0.6	0.01332	0.01545	0.01446	3	0.01441	0.000616342
0.62	0.01562	0.01679	0.01567	3	0.01602	0.000382528
0.64	0.01738	0.01943	0.01651	3	0.01777	0.000867444
0.66	0.02038	0.02044	0.0192	3	0.02	0.000401718
0.68	0.02364	0.02329	0.02397	3	0.02363	0.000196265
0.7	0.02758	0.02761	0.03071	3	0.02863	0.00104
0.72	0.03198	0.03225	0.03435	3	0.03286	0.000749186
0.74	0.03713	0.03491	0.03911	3	0.03705	0.00121
0.76	0.04081	0.04019	0.04952	3	0.0435	0.00301
0.78	0.04657	0.0448	0.0486	3	0.04666	0.0011
0.8	0.05316	0.05257	0.05648	3	0.05407	0.00122
0.82	0.05673	0.05913	0.06531	3	0.06039	0.00256
0.84	0.0624	0.06061	0.06613	3	0.06305	0.00163
0.86	0.06297	0.06301	0.06764	3	0.06454	0.00155
0.88	0.062	0.06688	0.07095	3	0.06661	0.00259
0.9	0.06064	0.06297	0.06686	3	0.06349	0.00181
0.92	0.05477	0.0602	0.05859	3	0.05785	0.00161
0.94	0.04854	0.05	0.04904	3	0.04919	0.000428358
0.96	0.03833	0.04004	0.03846	3	0.03894	0.00055009
0.98	0.0305	0.02866	0.02514	3	0.0281	0.00157
1	0.02178	0.01927	0.01668	3	0.01924	0.00147
1.02	0.01475	0.01262	0.00845	3	0.01194	0.00185
1.04	0.00933	0.00699	0.00467	3	0.007	0.00134
1.06	0.00588	0.00437	0.00238	3	0.00421	0.00101
1.08	0.00356	0.00257	0.00168	3	0.0026	0.000541842
1.1	0.00209	0.00133	0.000693275	3	0.00137	0.000403567
1.12	0.00141	0.000957864	0.0005928	3	0.000986001	0.000235557
1.14	0.000733661	0.000665614	0.000152483	3	0.000517253	0.00018344
1.16	0.000635952	0.000389474	0.000100402	3	0.000375276	0.000154763
1.18	0.000364839	0.000249875	0	3	0.000204905	0.000107693
1.2	0.00156	0.000840185	0.000212961	3	0.000870974	0.000389097

## Sheet: Figure 3E
smFRET Histogram - 0μM Glutamate + GPT/Pyruvate + 10μM BINA
FRET	Rep #1	Rep #2	Rep #3	N	Mean	S.E.M.
0	0.000448838	0.000307462	0.000480208	3	0.000412169	5.31311e-05
0.02	0.000441688	0.000658224	0.000771706	3	0.000623873	9.68038e-05
0.04	0.000791707	0.000666961	0.0017	3	0.00105	0.000326465
0.06	0.00143	0.00131	0.00261	3	0.00178	0.000413143
0.08	0.0035	0.00357	0.00408	3	0.00372	0.00018257
0.1	0.00557	0.00507	0.00752	3	0.00605	0.000747488
0.12	0.00933	0.00722	0.01069	3	0.00908	0.00101
0.14	0.01418	0.01088	0.01607	3	0.01371	0.00151
0.16	0.01853	0.01726	0.01905	3	0.01828	0.00053165
0.18	0.0278	0.02359	0.0243	3	0.02523	0.0013
0.2	0.03527	0.03356	0.03076	3	0.0332	0.00131
0.22	0.04229	0.03772	0.03661	3	0.03888	0.00174
0.24	0.05543	0.04762	0.04015	3	0.04773	0.00441
0.26	0.05946	0.05662	0.04535	3	0.05381	0.00431
0.28	0.06768	0.06353	0.05179	3	0.061	0.00476
0.3	0.0693	0.06016	0.05338	3	0.06094	0.00461
0.32	0.07103	0.06325	0.05622	3	0.0635	0.00428
0.34	0.06916	0.06231	0.05511	3	0.06219	0.00406
0.36	0.06343	0.05867	0.05273	3	0.05828	0.00309
0.38	0.05871	0.05171	0.04506	3	0.05183	0.00394
0.4	0.05259	0.04381	0.04212	3	0.04617	0.00324
0.42	0.04353	0.038	0.03492	3	0.03882	0.00252
0.44	0.0368	0.02934	0.03063	3	0.03226	0.0023
0.46	0.03033	0.02333	0.0291	3	0.02759	0.00216
0.48	0.02482	0.01816	0.02701	3	0.02333	0.00266
0.5	0.01878	0.0158	0.02436	3	0.01965	0.00251
0.52	0.01672	0.0139	0.02095	3	0.01719	0.00205
0.54	0.01278	0.01018	0.02003	3	0.01433	0.00295
0.56	0.00937	0.00954	0.0165	3	0.0118	0.00235
0.58	0.0083	0.00851	0.01578	3	0.01086	0.00246
0.6	0.00705	0.00914	0.01538	3	0.01053	0.0025
0.62	0.006	0.00837	0.01557	3	0.00998	0.00288
0.64	0.00441	0.00764	0.01582	3	0.00929	0.0034
0.66	0.00349	0.01046	0.01507	3	0.00967	0.00337
0.68	0.00384	0.0093	0.01661	3	0.00992	0.0037
0.7	0.00406	0.01215	0.01547	3	0.01056	0.00339
0.72	0.00293	0.01105	0.01472	3	0.00957	0.00348
0.74	0.00353	0.01305	0.01334	3	0.00997	0.00322
0.76	0.0028	0.01066	0.01354	3	0.009	0.00321
0.78	0.00284	0.0119	0.01092	3	0.00855	0.00287
0.8	0.00256	0.01291	0.00886	3	0.00811	0.00301
0.82	0.00216	0.01315	0.00719	3	0.0075	0.00318
0.84	0.00179	0.01094	0.00471	3	0.00581	0.0027
0.86	0.00252	0.00951	0.00383	3	0.00528	0.00214
0.88	0.00257	0.00881	0.0031	3	0.00483	0.002
0.9	0.0021	0.00782	0.00255	3	0.00416	0.00184
0.92	0.0028	0.00591	0.002	3	0.00357	0.00119
0.94	0.00336	0.00452	0.00198	3	0.00329	0.000735631
0.96	0.00414	0.00285	0.00155	3	0.00285	0.000746059
0.98	0.00338	0.00152	0.000894084	3	0.00193	0.000747341
1	0.00158	0.00107	0.00043824	3	0.00103	0.000329428
1.02	0.00107	0.000539226	0.000259415	3	0.000624378	0.000239114
1.04	0.000476351	0.000236564	0.000146359	3	0.000286424	9.84688e-05
1.06	0.000471594	5.16662e-05	7.51641e-05	3	0.000199475	0.000136229
1.08	0.000225103	4.16885e-05	2.73483e-05	3	9.80465e-05	6.36628e-05
1.1	1.08077e-05	2.58331e-05	2.50275e-05	3	2.05561e-05	4.87976e-06
1.12	5.28429e-05	8.79662e-05	3.30253e-05	3	5.79448e-05	1.60639e-05
1.14	6.8654e-06	0	0	3	2.28847e-06	2.28847e-06
1.16	0	0	9.1161e-06	3	3.0387e-06	3.0387e-06
1.18	0	0	0	3	0	0
1.2	0	0	4.70062e-05	3	1.56687e-05	1.56687e-05

## Sheet: Figure 3F
smFRET Histogram - 15μM Glutamate + 10μM BINA
FRET	Rep #1	Rep #2	Rep #3	N	Mean	S.E.M.
0	6.32041e-05	0.000127219	3.71637e-05	3	7.58623e-05	2.67561e-05
0.02	1.33002e-05	7.65565e-05	2.89425e-05	3	3.95997e-05	1.90221e-05
0.04	9.73673e-05	0.000139566	0.000108284	3	0.000115072	1.26456e-05
0.06	9.33207e-05	0.000188281	0.000198871	3	0.000160158	3.3558e-05
0.08	0.000248137	0.000337648	0.000157155	3	0.000247647	5.21043e-05
0.1	0.000292046	0.000734561	0.000502148	3	0.000509585	0.000127797
0.12	0.000528829	0.00131	0.000498121	3	0.000778391	0.000265064
0.14	0.000947584	0.00141	0.00106	3	0.00114	0.000140441
0.16	0.0014	0.00212	0.00197	3	0.00183	0.000218403
0.18	0.00146	0.00269	0.00223	3	0.00213	0.000357426
0.2	0.00224	0.00407	0.00322	3	0.00318	0.000529707
0.22	0.00294	0.00412	0.0037	3	0.00359	0.000344165
0.24	0.00363	0.00471	0.00485	3	0.00439	0.000386122
0.26	0.0045	0.00537	0.00603	3	0.0053	0.000443136
0.28	0.00486	0.00579	0.00664	3	0.00576	0.000512558
0.3	0.00582	0.00617	0.00901	3	0.007	0.00101
0.32	0.00664	0.00672	0.00945	3	0.00761	0.000923894
0.34	0.00697	0.00705	0.00893	3	0.00765	0.00064073
0.36	0.00705	0.00695	0.00937	3	0.00779	0.000791136
0.38	0.00706	0.0072	0.00956	3	0.00794	0.000810032
0.4	0.00693	0.00656	0.00903	3	0.0075	0.000768776
0.42	0.00719	0.00644	0.00894	3	0.00752	0.000740622
0.44	0.00725	0.0061	0.00818	3	0.00717	0.000601605
0.46	0.00696	0.00651	0.00808	3	0.00718	0.00046648
0.48	0.00751	0.00717	0.0074	3	0.00736	0.000101009
0.5	0.00709	0.00774	0.00726	3	0.00736	0.000194004
0.52	0.00788	0.00904	0.00819	3	0.00837	0.000347291
0.54	0.00799	0.01091	0.00797	3	0.00896	0.000977714
0.56	0.00918	0.01313	0.00941	3	0.01057	0.00128
0.58	0.00969	0.0176	0.01076	3	0.01268	0.00248
0.6	0.0108	0.02077	0.01346	3	0.01501	0.00298
0.62	0.01345	0.02547	0.01752	3	0.01881	0.00353
0.64	0.01592	0.03261	0.02116	3	0.02323	0.00493
0.66	0.02017	0.03727	0.02746	3	0.0283	0.00495
0.68	0.02364	0.04289	0.03134	3	0.03262	0.00559
0.7	0.02854	0.04702	0.0362	3	0.03725	0.00536
0.72	0.03514	0.05117	0.04005	3	0.04212	0.00474
0.74	0.04169	0.05415	0.04382	3	0.04656	0.00385
0.76	0.04854	0.05801	0.04661	3	0.05105	0.00352
0.78	0.05888	0.05863	0.05128	3	0.05627	0.00249
0.8	0.0636	0.05834	0.05405	3	0.05866	0.00276
0.82	0.06834	0.0562	0.05603	3	0.06019	0.00407
0.84	0.07206	0.05312	0.05602	3	0.0604	0.00589
0.86	0.0694	0.04931	0.05478	3	0.05783	0.006
0.88	0.06331	0.04405	0.05198	3	0.05311	0.00559
0.9	0.05899	0.03864	0.04899	3	0.04887	0.00588
0.92	0.04984	0.0301	0.04395	3	0.0413	0.00585
0.94	0.03952	0.02398	0.03908	3	0.03419	0.00511
0.96	0.02881	0.01845	0.03169	3	0.02632	0.00402
0.98	0.0213	0.01362	0.0228	3	0.01924	0.00284
1	0.01401	0.01004	0.01882	3	0.01429	0.00254
1.02	0.00855	0.00572	0.0117	3	0.00866	0.00173
1.04	0.00464	0.00374	0.00657	3	0.00498	0.000833117
1.06	0.00278	0.00291	0.00449	3	0.00339	0.000548615
1.08	0.00164	0.00167	0.0031	3	0.00214	0.000481095
1.1	0.000804711	0.00117	0.00152	3	0.00117	0.000207814
1.12	0.000441472	0.000619586	0.00102	3	0.000693121	0.000170528
1.14	0.000222619	0.000465141	0.000598922	3	0.000428894	0.000110131
1.16	0.000129773	0.000358598	0.000430367	3	0.000306246	9.06362e-05
1.18	9.5305e-05	0.000265551	0.000169964	3	0.00017694	4.92695e-05
1.2	0.000212045	0.000761595	0.000555332	3	0.000509657	0.000160277

## Sheet: Figure 3G
smFRET Histogram - 1000μM Glutamate + 10μM BINA
FRET	Rep #1	Rep #2	Rep #3	N	Mean	S.E.M.
0	1.37535e-05	0	0	3	4.58449e-06	4.58449e-06
0.02	6.87673e-06	8.19493e-05	2.45128e-05	3	3.77796e-05	2.26641e-05
0.04	7.18648e-05	0.000113828	3.67692e-05	3	7.4154e-05	2.22744e-05
0.06	6.87673e-06	8.19493e-05	6.1282e-05	3	5.0036e-05	2.23892e-05
0.08	9.71983e-05	0	0.000153205	3	8.34678e-05	4.47562e-05
0.1	0.000333201	5.46329e-05	0.000276262	3	0.000221365	8.49712e-05
0.12	0.00058361	0.000479196	0.000512999	3	0.000525268	3.07599e-05
0.14	0.000680732	0.000416866	0.00065658	3	0.000584726	8.42193e-05
0.16	0.00108	0.000731966	0.000903297	3	0.000906456	0.000101666
0.18	0.0011	0.00068712	0.000931487	3	0.000906584	0.000120165
0.2	0.00157	0.000542218	0.00115	3	0.00109	0.000299294
0.22	0.00171	0.000972741	0.00128	3	0.00132	0.000214645
0.24	0.00153	0.00106	0.00125	3	0.00128	0.000134554
0.26	0.00173	0.00132	0.0011	3	0.00138	0.000184223
0.28	0.00171	0.00195	0.00115	3	0.0016	0.000235061
0.3	0.00172	0.00158	0.0014	3	0.00157	9.13582e-05
0.32	0.00208	0.002	0.0014	3	0.00183	0.000216015
0.34	0.00271	0.00218	0.0012	3	0.00203	0.000442827
0.36	0.00259	0.00203	0.00125	3	0.00196	0.000389547
0.38	0.00266	0.00236	0.0014	3	0.00214	0.000381325
0.4	0.00257	0.00252	0.00134	3	0.00214	0.000401209
0.42	0.00251	0.00288	0.00181	3	0.0024	0.00031426
0.44	0.00312	0.00258	0.00202	3	0.00257	0.000315578
0.46	0.00303	0.00404	0.0027	3	0.00326	0.00040253
0.48	0.00348	0.00389	0.00389	3	0.00375	0.000137133
0.5	0.00383	0.00432	0.00352	3	0.00389	0.000230668
0.52	0.00429	0.00492	0.00531	3	0.00484	0.000295626
0.54	0.00509	0.00639	0.00645	3	0.00597	0.000441993
0.56	0.0061	0.00741	0.00756	3	0.00703	0.000462848
0.58	0.00792	0.00755	0.00914	3	0.0082	0.000479449
0.6	0.00955	0.0086	0.01095	3	0.0097	0.000681651
0.62	0.0119	0.01027	0.01246	3	0.01154	0.000656624
0.64	0.01374	0.01246	0.01506	3	0.01375	0.000750249
0.66	0.01787	0.01534	0.01865	3	0.01729	0.000999262
0.68	0.02169	0.0194	0.02122	3	0.02077	0.000696785
0.7	0.02742	0.02458	0.02614	3	0.02604	0.000822034
0.72	0.03159	0.03084	0.03181	3	0.03141	0.000293739
0.74	0.04146	0.03897	0.03873	3	0.03972	0.000871141
0.76	0.04778	0.0473	0.04353	3	0.0462	0.00134
0.78	0.05505	0.05627	0.05569	3	0.05567	0.000352157
0.8	0.06478	0.06692	0.06625	3	0.06598	0.000632099
0.82	0.07126	0.07342	0.07026	3	0.07165	0.000933463
0.84	0.07306	0.07914	0.07906	3	0.07709	0.00201
0.86	0.0723	0.08069	0.07654	3	0.07651	0.00242
0.88	0.0726	0.08062	0.07868	3	0.0773	0.00241
0.9	0.06678	0.07226	0.07122	3	0.07009	0.00168
0.92	0.06136	0.0636	0.06519	3	0.06338	0.00111
0.94	0.05262	0.05022	0.05208	3	0.05164	0.000727737
0.96	0.04256	0.0377	0.04035	3	0.04021	0.00141
0.98	0.03046	0.02562	0.02582	3	0.0273	0.00158
1	0.02152	0.01609	0.01903	3	0.01888	0.00157
1.02	0.01216	0.00953	0.01027	3	0.01065	0.000784437
1.04	0.00688	0.00596	0.00524	3	0.00603	0.000474726
1.06	0.00329	0.00374	0.0025	3	0.00318	0.000361701
1.08	0.00185	0.00173	0.00139	3	0.00166	0.000137395
1.1	0.000949493	0.00126	0.000762187	3	0.000991812	0.000146328
1.12	0.000673101	0.00080776	0.000418212	3	0.000633024	0.000114224
1.14	0.000313523	0.000544105	0.000204261	3	0.000353963	0.000100167
1.16	0.000200579	0.000391386	0.00026525	3	0.000285738	5.60259e-05
1.18	9.12579e-05	0.000201297	3.28256e-05	3	0.00010846	4.93883e-05
1.2	0.000271917	0.000380399	0.00030273	3	0.000318349	3.22751e-05

## Sheet: Figure 3H
See table 3 and associated source data

## Sheet: Figure 3I
Cross Correlation Analysis - BINA
15μM Glutamate (no modulator)								1000μM Glutamate (no modulator)								15μM Glutamate + 10μM BINA								1000μM Glutamate + 10μM BINA
Time (s)	Rep #1	Rep #2	Rep #3	N	Mean	S.E.M.		Time (s)	Rep #1	Rep #2	Rep #3	N	Mean	S.E.M.		Time (s)	Rep #1	Rep #2	Rep #3	N	Mean	S.E.M.		Time (s)	Rep #1	Rep #2	Rep #3	N	Mean	S.E.M.
0	-0.4	-0.39124	-0.56254	3	-0.45126	0.0557		0	-0.26867	-0.31561	-0.32296	3	-0.30241	0.017		0	-0.30755	-0.32829	-0.34214	3	-0.32599	0.01005		0	-0.22994	-0.22658	-0.24842	3	-0.23498	0.00679
0.05	-0.27675	-0.23616	-0.38543	3	-0.29945	0.04456		0.05	-0.17287	-0.19161	-0.21884	3	-0.19444	0.01335		0.05	-0.19235	-0.232	-0.23804	3	-0.2208	0.01433		0.05	-0.12123	-0.12186	-0.13532	3	-0.12614	0.00459
0.1	-0.22683	-0.18254	-0.30994	3	-0.23977	0.03734		0.1	-0.12914	-0.13424	-0.16955	3	-0.14431	0.0127		0.1	-0.15365	-0.19749	-0.19835	3	-0.18316	0.01476		0.1	-0.0985	-0.09425	-0.1156	3	-0.10278	0.00652
0.15	-0.20445	-0.16655	-0.2648	3	-0.21193	0.02861		0.15	-0.10262	-0.12371	-0.1625	3	-0.12961	0.01753		0.15	-0.14346	-0.17159	-0.16987	3	-0.16164	0.0091		0.15	-0.08631	-0.07843	-0.09187	3	-0.08554	0.0039
0.2	-0.1895	-0.15556	-0.2361	3	-0.19372	0.02335		0.2	-0.1042	-0.11269	-0.14162	3	-0.1195	0.01133		0.2	-0.12354	-0.15407	-0.15796	3	-0.14519	0.01088		0.2	-0.07854	-0.06701	-0.07563	3	-0.07372	0.00346
0.25	-0.17752	-0.13876	-0.21252	3	-0.17627	0.0213		0.25	-0.09738	-0.09917	-0.13587	3	-0.11081	0.01254		0.25	-0.11799	-0.14859	-0.14619	3	-0.13759	0.00982		0.25	-0.06587	-0.05934	-0.0722	3	-0.0658	0.00371
0.3	-0.16924	-0.12042	-0.19381	3	-0.16116	0.02157		0.3	-0.087	-0.0919	-0.13093	3	-0.10328	0.0139		0.3	-0.10209	-0.14104	-0.13221	3	-0.12511	0.01179		0.3	-0.06279	-0.05649	-0.08391	3	-0.06773	0.00829
0.35	-0.15655	-0.11385	-0.1725	3	-0.14763	0.01751		0.35	-0.08191	-0.08836	-0.12146	3	-0.09725	0.01225		0.35	-0.11103	-0.12905	-0.12639	3	-0.12216	0.00562		0.35	-0.0648	-0.05467	-0.06818	3	-0.06255	0.00406
0.4	-0.15207	-0.11947	-0.15587	3	-0.14247	0.01155		0.4	-0.07362	-0.08767	-0.10827	3	-0.08985	0.01006		0.4	-0.10192	-0.11738	-0.11681	3	-0.11204	0.00506		0.4	-0.05847	-0.04148	-0.06471	3	-0.05489	0.00694
0.45	-0.13459	-0.11205	-0.14982	3	-0.13215	0.01097		0.45	-0.06517	-0.0736	-0.11162	3	-0.08347	0.01429		0.45	-0.10272	-0.11249	-0.10594	3	-0.10705	0.00287		0.45	-0.04711	-0.04365	-0.06109	3	-0.05062	0.00533
0.5	-0.12905	-0.11055	-0.13261	3	-0.12407	0.00684		0.5	-0.06449	-0.07183	-0.09833	3	-0.07822	0.01028		0.5	-0.09687	-0.10936	-0.09944	3	-0.10189	0.00381		0.5	-0.04081	-0.04836	-0.04907	3	-0.04608	0.00264
0.55	-0.1264	-0.10759	-0.12996	3	-0.12132	0.00694		0.55	-0.06254	-0.07034	-0.09221	3	-0.07503	0.00888		0.55	-0.09572	-0.10003	-0.09083	3	-0.09553	0.00266		0.55	-0.05085	-0.04581	-0.06575	3	-0.05414	0.00599
0.6	-0.1185	-0.09708	-0.12731	3	-0.11429	0.00897		0.6	-0.0621	-0.06117	-0.08757	3	-0.07028	0.00865		0.6	-0.09208	-0.09609	-0.08699	3	-0.09172	0.00263		0.6	-0.03774	-0.03985	-0.05802	3	-0.0452	0.00644
0.65	-0.11077	-0.10025	-0.11744	3	-0.10949	0.005		0.65	-0.06281	-0.05573	-0.08594	3	-0.06816	0.00912		0.65	-0.08394	-0.09163	-0.07926	3	-0.08494	0.00361		0.65	-0.05065	-0.03251	-0.05148	3	-0.04488	0.00619
0.7	-0.10468	-0.0874	-0.10544	3	-0.09917	0.00589		0.7	-0.05085	-0.05364	-0.06112	3	-0.0552	0.00306		0.7	-0.07845	-0.08797	-0.0742	3	-0.0802	0.00407		0.7	-0.04758	-0.03733	-0.05479	3	-0.04657	0.00507
0.75	-0.10007	-0.08528	-0.1002	3	-0.09518	0.00495		0.75	-0.03755	-0.05275	-0.0827	3	-0.05767	0.01327		0.75	-0.07663	-0.07831	-0.07017	3	-0.07504	0.00248		0.75	-0.03726	-0.03306	-0.04693	3	-0.03909	0.00411
0.8	-0.09584	-0.07686	-0.09702	3	-0.08991	0.00653		0.8	-0.03323	-0.05318	-0.08426	3	-0.05689	0.01485		0.8	-0.07155	-0.07677	-0.0606	3	-0.06964	0.00477		0.8	-0.03682	-0.0342	-0.04471	3	-0.03858	0.00316
0.85	-0.09518	-0.08533	-0.09485	3	-0.09179	0.00323		0.85	-0.03346	-0.04712	-0.08788	3	-0.05616	0.01635		0.85	-0.07358	-0.0756	-0.07003	3	-0.07307	0.00163		0.85	-0.03459	-0.03195	-0.04732	3	-0.03795	0.00475
0.9	-0.08646	-0.07764	-0.0916	3	-0.08523	0.00408		0.9	-0.03368	-0.04401	-0.0932	3	-0.05696	0.01836		0.9	-0.06992	-0.06484	-0.06118	3	-0.06532	0.00253		0.9	-0.0429	-0.03364	-0.04595	3	-0.04083	0.0037
0.95	-0.08348	-0.07171	-0.08144	3	-0.07888	0.00363		0.95	-0.04238	-0.03531	-0.09149	3	-0.05639	0.01767		0.95	-0.06572	-0.063	-0.05972	3	-0.06281	0.00173		0.95	-0.04468	-0.03326	-0.04885	3	-0.04226	0.00466
1	-0.07883	-0.06216	-0.08013	3	-0.07371	0.00578		1	-0.02832	-0.04931	-0.08907	3	-0.05557	0.01781		1	-0.06799	-0.05653	-0.0572	3	-0.06057	0.00371		1	-0.03365	-0.03066	-0.04611	3	-0.03681	0.00473
1.05	-0.06981	-0.06405	-0.06908	3	-0.06765	0.00181		1.05	-0.02986	-0.04278	-0.07354	3	-0.04873	0.01295		1.05	-0.06155	-0.05567	-0.05449	3	-0.05723	0.00218		1.05	-0.03184	-0.04022	-0.03431	3	-0.03546	0.00249
1.1	-0.07122	-0.06384	-0.07486	3	-0.06997	0.00324		1.1	-0.02649	-0.0505	-0.06551	3	-0.0475	0.01136		1.1	-0.05791	-0.05746	-0.05631	3	-0.05722	0.000475369		1.1	-0.02842	-0.02876	-0.0329	3	-0.03003	0.00144
1.15	-0.06598	-0.05958	-0.06534	3	-0.06363	0.00204		1.15	-0.03609	-0.04937	-0.07202	3	-0.05249	0.01049		1.15	-0.05029	-0.05615	-0.05244	3	-0.05296	0.00171		1.15	-0.03074	-0.01526	-0.03053	3	-0.02551	0.00512
1.2	-0.06244	-0.05676	-0.06795	3	-0.06239	0.00323		1.2	-0.0349	-0.05698	-0.06231	3	-0.05139	0.00839		1.2	-0.04787	-0.0553	-0.0458	3	-0.04966	0.00288		1.2	-0.02496	-0.0303	-0.03954	3	-0.0316	0.00426
1.25	-0.06229	-0.05759	-0.06737	3	-0.06242	0.00282		1.25	-0.02647	-0.05983	-0.0663	3	-0.05087	0.01234		1.25	-0.05332	-0.05909	-0.03984	3	-0.05075	0.0057		1.25	-0.02494	-0.01922	-0.03732	3	-0.02716	0.00534
1.3	-0.04987	-0.054	-0.06044	3	-0.05477	0.00307		1.3	-0.03257	-0.04531	-0.07295	3	-0.05028	0.01192		1.3	-0.0528	-0.04652	-0.0439	3	-0.04774	0.00264		1.3	-0.0281	-0.02901	-0.03789	3	-0.03167	0.00312
1.35	-0.05196	-0.04848	-0.05514	3	-0.05186	0.00193		1.35	-0.02295	-0.0396	-0.07289	3	-0.04514	0.01468		1.35	-0.04885	-0.04758	-0.04322	3	-0.04655	0.0017		1.35	-0.02894	-0.02176	-0.04246	3	-0.03105	0.00607
1.4	-0.04989	-0.05282	-0.04993	3	-0.05088	0.000971055		1.4	-0.02538	-0.04949	-0.06518	3	-0.04668	0.01158		1.4	-0.04179	-0.04419	-0.03439	3	-0.04012	0.00295		1.4	-0.02822	-0.03061	-0.03965	3	-0.03283	0.00348
1.45	-0.05339	-0.0553	-0.0492	3	-0.05263	0.0018		1.45	-0.0319	-0.05035	-0.06434	3	-0.04886	0.0094		1.45	-0.04312	-0.0434	-0.03015	3	-0.03889	0.00437		1.45	-0.01624	-0.02707	-0.04693	3	-0.03008	0.00898
1.5	-0.05106	-0.04139	-0.04073	3	-0.04439	0.00334		1.5	-0.02918	-0.04323	-0.05151	3	-0.04131	0.00652		1.5	-0.03758	-0.03519	-0.03371	3	-0.03549	0.00113		1.5	-0.01517	-0.02332	-0.0262	3	-0.02156	0.0033
1.55	-0.04158	-0.04638	-0.04123	3	-0.04306	0.00166		1.55	-0.02995	-0.04069	-0.06106	3	-0.0439	0.00912		1.55	-0.04149	-0.0433	-0.03015	3	-0.03831	0.00411		1.55	-0.01306	-0.01827	-0.03704	3	-0.02279	0.00728
1.6	-0.04687	-0.04631	-0.03664	3	-0.04327	0.00332		1.6	-0.02944	-0.03299	-0.0619	3	-0.04144	0.01028		1.6	-0.03898	-0.04161	-0.02867	3	-0.03642	0.00395		1.6	-0.02314	-0.01715	-0.03293	3	-0.0244	0.0046
1.65	-0.03338	-0.04318	-0.03018	3	-0.03558	0.00391		1.65	-0.02157	-0.03546	-0.05213	3	-0.03639	0.00884		1.65	-0.03335	-0.03573	-0.03018	3	-0.03309	0.00161		1.65	-0.0192	-0.02325	-0.03222	3	-0.02489	0.00385
1.7	-0.03617	-0.03808	-0.02692	3	-0.03372	0.00345		1.7	-0.02399	-0.03712	-0.06698	3	-0.04269	0.01272		1.7	-0.03505	-0.03449	-0.03503	3	-0.03485	0.00018319		1.7	-0.01855	-0.01785	-0.03007	3	-0.02216	0.00396
1.75	-0.03367	-0.04082	-0.02595	3	-0.03348	0.00429		1.75	-0.02937	-0.03775	-0.05267	3	-0.03993	0.00681		1.75	-0.03108	-0.03567	-0.02331	3	-0.03002	0.00361		1.75	-0.01813	-0.02511	-0.03285	3	-0.02536	0.00425
1.8	-0.0365	-0.03282	-0.01748	3	-0.02893	0.00583		1.8	-0.02602	-0.03345	-0.06384	3	-0.0411	0.01157		1.8	-0.03281	-0.02912	-0.02837	3	-0.0301	0.00137		1.8	-0.02088	-0.02477	-0.03423	3	-0.02663	0.00397
1.85	-0.03038	-0.03537	-0.02038	3	-0.02871	0.00441		1.85	-0.02272	-0.03534	-0.05712	3	-0.03839	0.01005		1.85	-0.03379	-0.02599	-0.02857	3	-0.02945	0.00229		1.85	-0.01639	-0.01258	-0.02833	3	-0.0191	0.00474
1.9	-0.02701	-0.03825	-0.02373	3	-0.02966	0.0044		1.9	-0.03283	-0.02486	-0.05353	3	-0.03707	0.00855		1.9	-0.03121	-0.0306	-0.02577	3	-0.02919	0.00172		1.9	-0.02233	-0.0264	-0.01928	3	-0.02267	0.00206
1.95	-0.03439	-0.04299	-0.02415	3	-0.03384	0.00545		1.95	-0.02349	-0.02495	-0.04144	3	-0.02996	0.00575		1.95	-0.02242	-0.0252	-0.02189	3	-0.02317	0.00103		1.95	-0.01609	-0.02732	-0.01833	3	-0.02058	0.00343
2	-0.03205	-0.03151	-0.02526	3	-0.02961	0.00218		2	-0.02027	-0.02233	-0.05758	3	-0.03339	0.01211		2	-0.02745	-0.02867	-0.01516	3	-0.02376	0.00431		2	-0.01586	-0.01473	-0.02936	3	-0.01998	0.0047
2.05	-0.0345	-0.05082	-0.01803	3	-0.03445	0.00947		2.05	-0.01414	-0.01775	-0.05878	3	-0.03022	0.01432		2.05	-0.02334	-0.02488	-0.01474	3	-0.02099	0.00316		2.05	-0.01656	-0.02399	-0.02243	3	-0.02099	0.00226
2.1	-0.02713	-0.03033	-0.01471	3	-0.02406	0.00477		2.1	-0.00718	-0.02388	-0.05966	3	-0.03024	0.01548		2.1	-0.02643	-0.0296	-0.00841	3	-0.02148	0.0066		2.1	-0.02027	-0.01297	-0.01772	3	-0.01699	0.00214
2.15	-0.02482	-0.03559	-0.0143	3	-0.02491	0.00615		2.15	-0.01201	-0.02123	-0.06625	3	-0.03317	0.01675		2.15	-0.02233	-0.02762	-0.01892	3	-0.02296	0.00253		2.15	-0.01667	-0.02121	-0.01497	3	-0.01762	0.00186
2.2	-0.02685	-0.02977	-0.00932	3	-0.02198	0.00639		2.2	-0.01294	-0.01901	-0.05471	3	-0.02889	0.01303		2.2	-0.02034	-0.02386	-0.02064	3	-0.02162	0.00113		2.2	-0.01691	-0.01824	-0.02511	3	-0.02009	0.00254
2.25	-0.01936	-0.02604	-0.01323	3	-0.01954	0.0037		2.25	-0.01031	-0.01685	-0.04791	3	-0.02502	0.0116		2.25	-0.0208	-0.02582	-0.02261	3	-0.02307	0.00147		2.25	-0.01438	-0.02281	-0.01969	3	-0.01896	0.00246
2.3	-0.01717	-0.01837	-0.01529	3	-0.01694	0.000896469		2.3	-0.01036	-0.02317	-0.04037	3	-0.02463	0.00869		2.3	-0.01789	-0.02531	-0.02006	3	-0.02108	0.0022		2.3	-0.00349	-0.01873	-0.02514	3	-0.01579	0.00642
2.35	-0.01961	-0.01876	-0.01479	3	-0.01772	0.00149		2.35	-0.00552	-0.02568	-0.02823	3	-0.01981	0.00718		2.35	-0.01731	-0.01997	-0.02068	3	-0.01932	0.00103		2.35	-0.0114	-0.01912	-0.0124	3	-0.01431	0.00242
2.4	-0.01384	-0.01543	-0.01224	3	-0.01383	0.000920692		2.4	-0.01475	-0.03272	-0.03446	3	-0.02731	0.0063		2.4	-0.02427	-0.01792	-0.01475	3	-0.01898	0.0028		2.4	-0.0134	-0.01128	-0.01146	3	-0.01205	0.000678335
2.45	-0.00583	-0.01949	-0.01529	3	-0.01354	0.00404		2.45	-0.0232	-0.02779	-0.03308	3	-0.02803	0.00285		2.45	-0.02118	-0.01186	-0.01043	3	-0.01449	0.00337		2.45	-0.01391	-0.01811	-0.01948	3	-0.01717	0.00167
2.5	-0.00951	-0.0245	-0.00967	3	-0.01456	0.00497		2.5	-0.02339	-0.0341	-0.02121	3	-0.02623	0.00398		2.5	-0.00793	-0.02128	-0.01187	3	-0.01369	0.00396		2.5	-0.01304	-0.0065	-0.0119	3	-0.01048	0.00202
2.55	-0.01165	-0.03037	-0.00424	3	-0.01542	0.00778		2.55	-0.01278	-0.02128	-0.02946	3	-0.02117	0.00482		2.55	-0.00924	-0.01839	-0.02119	3	-0.01627	0.00361		2.55	-0.01949	-0.01511	-0.02654	3	-0.02038	0.00333
2.6	-0.01282	-0.02542	-0.01198	3	-0.01674	0.00435		2.6	-0.0106	-0.01829	-0.02667	3	-0.01852	0.00464		2.6	0	-0.01513	-0.01152	3	-0.00888	0.00456		2.6	-0.01034	-0.01435	-0.01041	3	-0.0117	0.00132
2.65	-0.00123	-0.01731	-0.01174	3	-0.01009	0.00471		2.65	-0.00635	-0.01914	-0.04	3	-0.02183	0.00981		2.65	-0.01534	-0.01255	-0.0169	3	-0.01493	0.00127		2.65	-0.00746	-0.01862	-0.00936	3	-0.01182	0.00345
2.7	-0.00109	-0.0171	-0.01547	3	-0.01122	0.00509		2.7	-0.01026	-0.02091	-0.03589	3	-0.02235	0.00743		2.7	-0.01446	-0.00573	-0.000906587	3	-0.00703	0.00397		2.7	-0.01108	-0.02268	-0.00992	3	-0.01456	0.00407
2.75	-0.00238	-0.0161	-0.00632	3	-0.00827	0.00408		2.75	-0.0142	-0.00295	-0.04882	3	-0.02199	0.0138		2.75	-0.00959	-0.01202	-0.0079	3	-0.00984	0.0012		2.75	-0.01076	-0.01668	-0.01178	3	-0.01307	0.00183
2.8	-0.00563	-0.00869	-0.0056	3	-0.00664	0.00102		2.8	-0.01267	-0.02293	-0.03241	3	-0.02267	0.0057		2.8	-0.0103	0	-0.00865	3	-0.00632	0.00319		2.8	-0.00987	-0.01972	-0.000489277	3	-0.01003	0.00555
2.85	-0.00364	-0.00448	-0.00728	3	-0.00513	0.0011		2.85	-0.01139	-0.01275	-0.01713	3	-0.01376	0.00173		2.85	-0.01739	-0.01412	-0.00685	3	-0.01279	0.00311		2.85	-0.00798	-0.02049	-0.0044	3	-0.01096	0.00488
2.9	-0.00107	-0.01816	-0.01277	3	-0.01067	0.00504		2.9	-0.00486	-0.00314	-0.03001	3	-0.01267	0.00868		2.9	-0.013	-0.00331	-0.00565	3	-0.00732	0.00292		2.9	-0.01392	-0.01763	-0.01335	3	-0.01497	0.00134
2.95	-0.00147	-0.00968	-0.01209	3	-0.00775	0.00322		2.95	-0.01465	-0.01845	-0.04424	3	-0.02578	0.0093		2.95	-0.0132	-0.01054	-0.00417	3	-0.0093	0.00268		2.95	-0.01014	-0.01772	-0.016	3	-0.01462	0.0023
