# Supplementary material for: Conformational fingerprinting of allosteric modulators in metabotropic glutamate receptor 2
Source: eLife. 2022 Jul 1;11:e78982. doi: 10.7554/eLife.78982 (PMC9299836; doi:10.7554/eLife.78982)
Supplement: Figure 4—source data 1. [file elife-78982-fig4-data1.xlsx]

## Sheet: Figure 4A
smFRET Histogram - 0μM Glutamate + GPT/Pyruvate + 5μM MNI-137
FRET	Rep #1	Rep #2	Rep #3	N	Mean	S.E.M.
0	0.000506499	0.000373642	0.00065276	3	0.000510967	8.06055e-05
0.02	0.000698653	0.000722358	0.000570001	3	0.000663671	4.73323e-05
0.04	0.00228	0.00234	0.00194	3	0.00218	0.000123685
0.06	0.00439	0.00357	0.00458	3	0.00418	0.000312413
0.08	0.00798	0.00775	0.00831	3	0.00801	0.000161902
0.1	0.01443	0.01331	0.01437	3	0.01404	0.000362848
0.12	0.02465	0.0222	0.02356	3	0.02347	0.000707819
0.14	0.03588	0.03718	0.03739	3	0.03681	0.000472543
0.16	0.05183	0.05219	0.04989	3	0.05131	0.00071393
0.18	0.06458	0.06752	0.06717	3	0.06643	0.00092692
0.2	0.07976	0.08125	0.07864	3	0.07988	0.00075567
0.22	0.08672	0.08976	0.08878	3	0.08842	0.000894613
0.24	0.08864	0.08655	0.09071	3	0.08863	0.0012
0.26	0.08743	0.08483	0.09003	3	0.08743	0.0015
0.28	0.077	0.07868	0.08104	3	0.07891	0.00117
0.3	0.06713	0.06695	0.07414	3	0.06941	0.00237
0.32	0.05459	0.0577	0.06046	3	0.05758	0.0017
0.34	0.04635	0.04617	0.05101	3	0.04784	0.00159
0.36	0.0374	0.03654	0.041	3	0.03831	0.00136
0.38	0.02894	0.02973	0.0337	3	0.03079	0.00147
0.4	0.02312	0.02443	0.02665	3	0.02474	0.00103
0.42	0.0185	0.01945	0.0218	3	0.01992	0.000978873
0.44	0.01386	0.01685	0.01482	3	0.01517	0.000882016
0.46	0.01138	0.01212	0.01016	3	0.01122	0.000571321
0.48	0.00845	0.00983	0.00807	3	0.00878	0.000535227
0.5	0.0073	0.00865	0.00476	3	0.0069	0.00114
0.52	0.00537	0.00713	0.00317	3	0.00522	0.00115
0.54	0.00475	0.00493	0.0017	3	0.0038	0.00105
0.56	0.00391	0.004	0.00129	3	0.00307	0.000891202
0.58	0.00321	0.00324	0.000692582	3	0.00238	0.000844119
0.6	0.00267	0.00342	0.000674601	3	0.00226	0.000819551
0.62	0.00214	0.00284	0.000299808	3	0.00176	0.000757044
0.64	0.0019	0.00282	0.000192485	3	0.00164	0.00077039
0.66	0.00155	0.00181	0.000217115	3	0.00119	0.000493632
0.68	0.00133	0.00239	0.000138819	3	0.00129	0.000650568
0.7	0.00125	0.00184	6.91316e-05	3	0.00106	0.000521781
0.72	0.00122	0.0014	9.67715e-05	3	0.000906319	0.000407833
0.74	0.00113	0.00123	4.86343e-05	3	0.000802775	0.000378191
0.76	0.0014	0.00142	5.7864e-05	3	0.000957718	0.000449953
0.78	0.00168	0.000998184	0.000135855	3	0.000937717	0.000446525
0.8	0.00166	0.000789516	9.71079e-05	3	0.000848727	0.000452011
0.82	0.00202	0.000870985	1.94537e-05	3	0.000970044	0.00057954
0.84	0.00266	0.000625853	6.74301e-05	3	0.00112	0.000787716
0.86	0.0027	0.00038924	0.000349203	3	0.00114	0.000775354
0.88	0.00233	0.000368826	0.000591234	3	0.0011	0.000621112
0.9	0.00278	0.000235562	0.000873007	3	0.0013	0.000765159
0.92	0.00239	0.000192883	0.000708132	3	0.0011	0.000662337
0.94	0.002	0.000151362	0.000465604	3	0.000872287	0.000571055
0.96	0.00176	8.30421e-05	0.00116	3	0.001	0.00049143
0.98	0.00119	3.02725e-05	0.000873007	3	0.000696137	0.000344909
1	0.000601729	5.16119e-05	0.000698405	3	0.000450582	0.000201428
1.02	0.000397244	4.03633e-05	0.000349203	3	0.00026227	0.000111817
1.04	9.07035e-05	1.00908e-05	0.000349203	3	0.000149999	0.000102284
1.06	7.58449e-05	1.00908e-05	0	3	2.86452e-05	2.37789e-05
1.08	1.18114e-05	0	5.82004e-05	3	2.33373e-05	1.77619e-05
1.1	0	1.00908e-05	0.000232802	3	8.09642e-05	7.59747e-05
1.12	0	0	5.82004e-05	3	1.94001e-05	1.94001e-05
1.14	0	0	5.82004e-05	3	1.94001e-05	1.94001e-05
1.16	2.99043e-05	0	0	3	9.9681e-06	9.9681e-06
1.18	0	0	0	3	0	0
1.2	0	0	0	3	0	0

## Sheet: Figure 4B
smFRET Histogram - 15μM Glutamate + 5μM MNI-137
FRET	Rep #1	Rep #2	Rep #3	N	Mean	S.E.M.
0	0.000141528	0.000217882	0.000211076	3	0.000190162	2.43963e-05
0.02	0.000138279	0.000205086	0.000230943	3	0.000191436	2.76067e-05
0.04	0.000194077	0.000372947	0.000315259	3	0.000294094	5.27084e-05
0.06	0.00050707	0.000604715	0.000509205	3	0.00054033	3.21982e-05
0.08	0.00101	0.00128	0.00122	3	0.00117	8.09844e-05
0.1	0.002	0.00228	0.00202	3	0.0021	9.20036e-05
0.12	0.00307	0.00331	0.00326	3	0.00321	7.32066e-05
0.14	0.00427	0.00567	0.00525	3	0.00506	0.000416314
0.16	0.0067	0.00837	0.00845	3	0.00784	0.000569505
0.18	0.01107	0.01375	0.01308	3	0.01263	0.000804936
0.2	0.01559	0.01999	0.01785	3	0.01781	0.00127
0.22	0.02224	0.02718	0.02552	3	0.02498	0.00145
0.24	0.03131	0.03636	0.03273	3	0.03347	0.0015
0.26	0.03882	0.04626	0.04222	3	0.04243	0.00215
0.28	0.0506	0.05801	0.05263	3	0.05374	0.00221
0.3	0.06009	0.06744	0.06144	3	0.06299	0.00226
0.32	0.0677	0.07465	0.06972	3	0.07069	0.00206
0.34	0.07528	0.07658	0.07434	3	0.0754	0.000648651
0.36	0.07775	0.07914	0.07454	3	0.07714	0.00136
0.38	0.07228	0.07463	0.07237	3	0.07309	0.000769941
0.4	0.06861	0.06639	0.06588	3	0.06696	0.000839685
0.42	0.05855	0.05421	0.05713	3	0.05663	0.00128
0.44	0.04996	0.04676	0.04668	3	0.0478	0.00108
0.46	0.04155	0.03566	0.03732	3	0.03818	0.00175
0.48	0.03212	0.02719	0.0299	3	0.02974	0.00143
0.5	0.02489	0.02122	0.02238	3	0.02283	0.00108
0.52	0.01907	0.01645	0.01715	3	0.01756	0.000782042
0.54	0.01488	0.01233	0.01463	3	0.01395	0.000811314
0.56	0.01239	0.01054	0.01239	3	0.01177	0.000614749
0.58	0.01045	0.00891	0.01093	3	0.0101	0.000609871
0.6	0.00836	0.00814	0.0102	3	0.0089	0.00065125
0.62	0.00869	0.00727	0.00893	3	0.0083	0.000519608
0.64	0.00857	0.00726	0.00889	3	0.00824	0.000497154
0.66	0.00832	0.00647	0.00856	3	0.00778	0.000662587
0.68	0.00791	0.00662	0.00871	3	0.00775	0.000610727
0.7	0.00772	0.00606	0.00824	3	0.00734	0.000657522
0.72	0.00737	0.00544	0.00793	3	0.00691	0.000753786
0.74	0.00706	0.00506	0.00694	3	0.00635	0.000647307
0.76	0.00674	0.00465	0.00658	3	0.00599	0.000671336
0.78	0.00672	0.00452	0.00625	3	0.00583	0.000670523
0.8	0.00644	0.00449	0.00583	3	0.00559	0.000574576
0.82	0.00584	0.00345	0.0056	3	0.00496	0.00075734
0.84	0.00591	0.00373	0.00548	3	0.00504	0.000667426
0.86	0.00548	0.00336	0.00517	3	0.00467	0.000661634
0.88	0.00524	0.0038	0.0051	3	0.00472	0.000457253
0.9	0.00479	0.00417	0.00469	3	0.00455	0.000194271
0.92	0.00387	0.00373	0.00387	3	0.00382	4.85331e-05
0.94	0.00351	0.00426	0.00319	3	0.00365	0.000315859
0.96	0.00255	0.00339	0.0024	3	0.00278	0.000307642
0.98	0.00217	0.00303	0.00181	3	0.00234	0.000362768
1	0.00143	0.00207	0.0011	3	0.00153	0.000283489
1.02	0.000970566	0.00126	0.000632289	3	0.000954184	0.000181302
1.04	0.000358461	0.000805098	0.000714057	3	0.000625872	0.000136264
1.06	0.000327665	0.000412896	0.000274204	3	0.000338255	4.03855e-05
1.08	0.000207877	0.000214695	0.000198487	3	0.00020702	4.69847e-06
1.1	0.000101217	0.000146866	0.000160203	3	0.000136096	1.78591e-05
1.12	5.42694e-05	0.000101869	4.98654e-05	3	6.8668e-05	1.66492e-05
1.14	1.74291e-05	4.92708e-05	7.4798e-05	3	4.7166e-05	1.65944e-05
1.16	1.20714e-05	5.25984e-05	4.32934e-05	3	3.59877e-05	1.22562e-05
1.18	1.34114e-05	0	2.49327e-05	3	1.27814e-05	7.20434e-06
1.2	8.20805e-06	2.62992e-05	7.4798e-05	3	3.64351e-05	1.98797e-05

## Sheet: Figure 4C
smFRET Histogram - 1000μM Glutamate + 5μM MNI-137
FRET	Rep #1	Rep #2	Rep #3	N	Mean	S.E.M.
0	0.000139672	8.60339e-05	1.60697e-05	3	8.05918e-05	3.57845e-05
0.02	0.000195988	2.54757e-05	9.70374e-06	3	7.70557e-05	5.96401e-05
0.04	0.000159892	0.000140304	5.36655e-05	3	0.000117954	3.26377e-05
0.06	0.000292594	0.000238777	0.00013283	3	0.0002214	4.69313e-05
0.08	0.000452077	0.000399617	0.000205238	3	0.000352311	7.50795e-05
0.1	0.000997308	0.000715164	0.000476634	3	0.000729702	0.000150481
0.12	0.00165	0.00102	0.000826865	3	0.00117	0.000249318
0.14	0.0021	0.00152	0.00105	3	0.00156	0.000304781
0.16	0.00369	0.00285	0.00205	3	0.00286	0.000473211
0.18	0.00627	0.00473	0.00297	3	0.00466	0.000952348
0.2	0.00923	0.00719	0.00553	3	0.00732	0.00107
0.22	0.01333	0.0104	0.0082	3	0.01064	0.00149
0.24	0.01971	0.01479	0.01167	3	0.01539	0.00234
0.26	0.0259	0.02095	0.01721	3	0.02135	0.00252
0.28	0.0335	0.02811	0.02472	3	0.02877	0.00256
0.3	0.04141	0.03446	0.03316	3	0.03634	0.00256
0.32	0.04764	0.04042	0.04172	3	0.04326	0.00222
0.34	0.05423	0.04641	0.04595	3	0.04886	0.00269
0.36	0.05681	0.04931	0.05247	3	0.05287	0.00217
0.38	0.05601	0.04941	0.05352	3	0.05298	0.00192
0.4	0.05239	0.04722	0.05238	3	0.05067	0.00172
0.42	0.04651	0.04516	0.04674	3	0.04614	0.000492681
0.44	0.04058	0.03828	0.04291	3	0.04059	0.00134
0.46	0.03435	0.03411	0.03622	3	0.0349	0.00066642
0.48	0.02886	0.02872	0.03081	3	0.02946	0.000676097
0.5	0.02449	0.02564	0.02477	3	0.02497	0.000347324
0.52	0.02075	0.02184	0.02212	3	0.02157	0.000416852
0.54	0.01803	0.02052	0.01979	3	0.01945	0.000739604
0.56	0.01618	0.0192	0.01992	3	0.01843	0.00115
0.58	0.01579	0.01978	0.01859	3	0.01805	0.00118
0.6	0.01558	0.01946	0.02026	3	0.01844	0.00144
0.62	0.01602	0.01996	0.02011	3	0.01869	0.00134
0.64	0.01672	0.02095	0.01995	3	0.01921	0.00128
0.66	0.01664	0.02257	0.02232	3	0.02051	0.00193
0.68	0.01728	0.02273	0.02219	3	0.02073	0.00174
0.7	0.01822	0.02426	0.02382	3	0.0221	0.00195
0.72	0.01932	0.02473	0.02387	3	0.02264	0.00168
0.74	0.01996	0.0254	0.02419	3	0.02318	0.00165
0.76	0.01975	0.02504	0.02383	3	0.02287	0.0016
0.78	0.02048	0.02494	0.02111	3	0.02218	0.0014
0.8	0.02023	0.02458	0.02173	3	0.02218	0.00127
0.82	0.01961	0.02328	0.02127	3	0.02139	0.00106
0.84	0.01801	0.02245	0.02152	3	0.02066	0.00135
0.86	0.01625	0.01868	0.02067	3	0.01853	0.00128
0.88	0.01505	0.01741	0.01784	3	0.01677	0.000866305
0.9	0.01363	0.0137	0.01562	3	0.01432	0.000653284
0.92	0.01186	0.01171	0.01226	3	0.01194	0.000165899
0.94	0.00971	0.00792	0.01029	3	0.00931	0.000713605
0.96	0.00662	0.00601	0.0083	3	0.00698	0.000684711
0.98	0.00569	0.00417	0.00508	3	0.00498	0.000443614
1	0.00446	0.00268	0.00331	3	0.00349	0.000520169
1.02	0.00264	0.00143	0.00232	3	0.00213	0.000362449
1.04	0.00145	0.00096835	0.00109	3	0.00117	0.000144853
1.06	0.00119	0.000588118	0.000436438	3	0.000738137	0.000230064
1.08	0.000546034	0.000216007	0.000217007	3	0.000326349	0.000109843
1.1	0.000423473	0.000193327	8.11687e-05	3	0.000232656	0.000100752
1.12	0.0002747	0.000154909	0	3	0.000143203	7.95147e-05
1.14	0.000207247	3.59174e-05	4.09165e-05	3	9.46936e-05	5.62951e-05
1.16	0.000178667	6.86265e-05	5.58036e-05	3	0.000101032	3.89935e-05
1.18	7.13436e-05	4.75691e-05	5.67151e-06	3	4.15281e-05	1.9197e-05
1.2	0.000279353	3.15243e-05	9.49848e-06	3	0.000106792	8.65146e-05

## Sheet: Figure 4D
See table 3 and associated source data

## Sheet: Figure 4F
Cross Correlation Analysis - MNI-137
0μM Glutamate + GPT/Pyruvate + 5μM MNI-137								15μM Glutamate + 5μM MNI-137								1000μM Glutamate + 5μM MNI-137
Time (s)	Rep #1	Rep #2	Rep #3	N	Mean	S.E.M.		Time (s)	Rep #1	Rep #2	Rep #3	N	Mean	S.E.M.		Time (s)	Rep #1	Rep #2	Rep #3	N	Mean	S.E.M.
0	-0.25176	-0.23474	-0.25121	3	-0.2459	0.00558		0	-0.3305	-0.35494	-0.42618	3	-0.37054	0.0287		0	-0.42913	-0.49283	-0.48028	3	-0.46741	0.01948
0.05	-0.06692	-0.06943	-0.0762	3	-0.07085	0.00277		0.05	-0.157	-0.14368	-0.22189	3	-0.17419	0.02416		0.05	-0.30221	-0.3546	-0.33682	3	-0.33121	0.01538
0.1	-0.04561	-0.04466	-0.02884	3	-0.0397	0.00544		0.1	-0.11968	-0.1045	-0.16568	3	-0.12996	0.01839		0.1	-0.24943	-0.29048	-0.27554	3	-0.27182	0.012
0.15	-0.04508	-0.04169	-0.02404	3	-0.03694	0.00652		0.15	-0.09792	-0.08447	-0.1336	3	-0.10533	0.01466		0.15	-0.21887	-0.25299	-0.24014	3	-0.23733	0.00995
0.2	-0.03128	-0.02397	-0.02876	3	-0.028	0.00214		0.2	-0.08533	-0.07377	-0.12401	3	-0.09437	0.01519		0.2	-0.19826	-0.22886	-0.20657	3	-0.21123	0.00914
0.25	-0.0352	-0.03901	-0.02277	3	-0.03232	0.0049		0.25	-0.078	-0.06229	-0.10814	3	-0.08281	0.01345		0.25	-0.17512	-0.2089	-0.19163	3	-0.19189	0.00975
0.3	-0.02337	-0.04064	-0.03333	3	-0.03245	0.005		0.3	-0.06821	-0.0568	-0.09459	3	-0.0732	0.01119		0.3	-0.16196	-0.18998	-0.17542	3	-0.17578	0.00809
0.35	-0.02535	-0.0397	-0.03349	3	-0.03285	0.00416		0.35	-0.06235	-0.0502	-0.08836	3	-0.06697	0.01125		0.35	-0.14911	-0.17628	-0.16335	3	-0.16291	0.00785
0.4	-0.02824	-0.03618	-0.02535	3	-0.02992	0.00324		0.4	-0.06392	-0.04137	-0.07365	3	-0.05965	0.00956		0.4	-0.13954	-0.16776	-0.14686	3	-0.15139	0.00845
0.45	-0.01853	-0.02949	-0.02888	3	-0.02563	0.00356		0.45	-0.05398	-0.04447	-0.07724	3	-0.05857	0.00973		0.45	-0.13019	-0.15805	-0.13943	3	-0.14256	0.00819
0.5	-0.0193	-0.03019	-0.0201	3	-0.0232	0.0035		0.5	-0.05265	-0.04217	-0.07638	3	-0.05707	0.01012		0.5	-0.1175	-0.14484	-0.1297	3	-0.13068	0.00791
0.55	-0.01725	-0.03435	-0.0246	3	-0.0254	0.00495		0.55	-0.05421	-0.03797	-0.07066	3	-0.05428	0.00944		0.55	-0.10972	-0.14113	-0.12159	3	-0.12415	0.00916
0.6	-0.02443	-0.03418	-0.01755	3	-0.02539	0.00483		0.6	-0.0406	-0.04036	-0.06259	3	-0.04785	0.00737		0.6	-0.10661	-0.12966	-0.11687	3	-0.11771	0.00667
0.65	-0.0202	-0.03034	-0.02034	3	-0.02363	0.00336		0.65	-0.04234	-0.03907	-0.06487	3	-0.04876	0.00811		0.65	-0.09867	-0.12386	-0.10532	3	-0.10929	0.00754
0.7	-0.02162	-0.02235	-0.02686	3	-0.02361	0.00164		0.7	-0.03441	-0.03623	-0.05513	3	-0.04192	0.00662		0.7	-0.09241	-0.11251	-0.0991	3	-0.10134	0.00591
0.75	-0.01848	-0.01465	-0.02221	3	-0.01845	0.00218		0.75	-0.03998	-0.02522	-0.06619	3	-0.0438	0.01198		0.75	-0.088	-0.11219	-0.09838	3	-0.09952	0.00701
0.8	-0.02306	-0.02464	-0.01453	3	-0.02074	0.00314		0.8	-0.03572	-0.03075	-0.06211	3	-0.04286	0.00973		0.8	-0.08114	-0.10234	-0.09537	3	-0.09295	0.00624
0.85	-0.02039	-0.03341	-0.0161	3	-0.0233	0.00521		0.85	-0.03587	-0.02906	-0.05946	3	-0.04147	0.00921		0.85	-0.07754	-0.09411	-0.09013	3	-0.08726	0.00499
0.9	-0.02206	-0.03134	-0.02226	3	-0.02522	0.00306		0.9	-0.03673	-0.02431	-0.05565	3	-0.0389	0.00911		0.9	-0.07515	-0.09531	-0.08569	3	-0.08538	0.00582
0.95	-0.02006	-0.03282	-0.01473	3	-0.02254	0.00537		0.95	-0.03814	-0.02564	-0.05187	3	-0.03855	0.00757		0.95	-0.07176	-0.08756	-0.07881	3	-0.07938	0.00457
1	-0.01586	-0.03449	-0.01754	3	-0.02263	0.00595		1	-0.02607	-0.02875	-0.05144	3	-0.03542	0.00805		1	-0.06145	-0.08445	-0.07918	3	-0.07503	0.00696
1.05	-0.00929	-0.02671	-0.01361	3	-0.01654	0.00524		1.05	-0.02431	-0.02422	-0.04501	3	-0.03118	0.00691		1.05	-0.06034	-0.08195	-0.07411	3	-0.07213	0.00631
1.1	-0.01223	-0.02091	-0.01769	3	-0.01694	0.00253		1.1	-0.02687	-0.02753	-0.04308	3	-0.03249	0.0053		1.1	-0.05181	-0.0756	-0.06379	3	-0.06374	0.00687
1.15	-0.01948	-0.03295	-0.02109	3	-0.0245	0.00425		1.15	-0.01883	-0.02177	-0.04323	3	-0.02794	0.00769		1.15	-0.05327	-0.07186	-0.06594	3	-0.06369	0.00549
1.2	-0.02183	-0.03144	-0.00707	3	-0.02011	0.00709		1.2	-0.02674	-0.02815	-0.04606	3	-0.03365	0.00622		1.2	-0.05444	-0.06701	-0.06664	3	-0.0627	0.00413
1.25	-0.02181	-0.03454	-0.01803	3	-0.02479	0.00499		1.25	-0.02463	-0.0248	-0.04678	3	-0.03207	0.00735		1.25	-0.04922	-0.06173	-0.06224	3	-0.05773	0.00426
1.3	-0.00992	-0.03401	-0.01429	3	-0.01941	0.00741		1.3	-0.01905	-0.02341	-0.04285	3	-0.02844	0.00732		1.3	-0.04717	-0.06186	-0.05427	3	-0.05443	0.00424
1.35	-0.01681	-0.03025	-0.00986	3	-0.01897	0.00598		1.35	-0.02306	-0.01977	-0.0432	3	-0.02868	0.00732		1.35	-0.04519	-0.05314	-0.05391	3	-0.05075	0.00279
1.4	-0.01513	-0.0399	-0.01641	3	-0.02381	0.00805		1.4	-0.02214	-0.01723	-0.03374	3	-0.02437	0.0049		1.4	-0.04654	-0.0546	-0.04912	3	-0.05008	0.00238
1.45	-0.00556	-0.02147	-0.01776	3	-0.01493	0.00481		1.45	-0.01922	-0.01269	-0.03834	3	-0.02342	0.00769		1.45	-0.04154	-0.04867	-0.05199	3	-0.0474	0.00308
1.5	-0.01	-0.0286	-0.01231	3	-0.01697	0.00585		1.5	-0.0221	-0.01229	-0.03378	3	-0.02272	0.00621		1.5	-0.0441	-0.04548	-0.04458	3	-0.04472	0.000405166
1.55	-0.01131	-0.02435	-0.02804	3	-0.02123	0.00507		1.55	-0.02378	-0.01718	-0.0349	3	-0.02529	0.00517		1.55	-0.04422	-0.04514	-0.04453	3	-0.04463	0.000268375
1.6	-0.00892	-0.02109	-0.02125	3	-0.01709	0.00408		1.6	-0.01914	-0.01476	-0.03973	3	-0.02454	0.0077		1.6	-0.04524	-0.03898	-0.0356	3	-0.03994	0.00283
1.65	-0.00774	-0.01269	-0.02	3	-0.01348	0.00356		1.65	-0.02249	-0.00922	-0.02934	3	-0.02035	0.00591		1.65	-0.04492	-0.03677	-0.03728	3	-0.03966	0.00264
1.7	-0.01603	-0.0157	-0.01107	3	-0.01427	0.0016		1.7	-0.0201	-0.01457	-0.03233	3	-0.02233	0.00525		1.7	-0.04202	-0.039	-0.03579	3	-0.03894	0.0018
1.75	-0.00955	-0.02151	-0.01724	3	-0.0161	0.0035		1.75	-0.01863	-0.02339	-0.02942	3	-0.02381	0.00312		1.75	-0.04081	-0.03888	-0.03857	3	-0.03942	0.000699431
1.8	-0.00983	-0.01464	-0.00869	3	-0.01106	0.00182		1.8	-0.01915	-0.01425	-0.02777	3	-0.02039	0.00395		1.8	-0.03864	-0.03539	-0.04318	3	-0.03907	0.00226
1.85	-0.00947	-0.00988	-0.0056	3	-0.00832	0.00136		1.85	-0.02674	-0.01407	-0.0301	3	-0.02364	0.00488		1.85	-0.03404	-0.02886	-0.03729	3	-0.03339	0.00245
1.9	-0.00393	-0.01728	-0.02278	3	-0.01466	0.0056		1.9	-0.01863	-0.01763	-0.02428	3	-0.02018	0.00207		1.9	-0.02949	-0.03007	-0.03674	3	-0.0321	0.00233
1.95	-0.01107	-0.01586	-0.01888	3	-0.01527	0.00227		1.95	-0.01087	-0.01859	-0.02685	3	-0.01877	0.00461		1.95	-0.02773	-0.034	-0.04029	3	-0.034	0.00363
2	-0.01194	-0.01029	-0.02384	3	-0.01535	0.00427		2	-0.018	-0.01334	-0.01887	3	-0.01674	0.00172		2	-0.02768	-0.02859	-0.02944	3	-0.02857	0.000506358
2.05	-0.01135	-0.02229	-0.00696	3	-0.01353	0.00456		2.05	-0.01653	-0.00914	-0.02703	3	-0.01757	0.00519		2.05	-0.0225	-0.02866	-0.03092	3	-0.02736	0.00252
2.1	-0.01681	-0.02957	-0.02348	3	-0.02329	0.00368		2.1	-0.01218	-0.00181	-0.01857	3	-0.01085	0.00488		2.1	-0.02548	-0.0236	-0.03453	3	-0.02787	0.00337
2.15	-0.01811	-0.01346	-0.01087	3	-0.01414	0.00212		2.15	-0.00966	-0.00954	-0.02122	3	-0.01347	0.00387		2.15	-0.02249	-0.0213	-0.02396	3	-0.02259	0.000767859
2.2	-0.01577	-0.01553	-0.00784	3	-0.01305	0.00261		2.2	-0.00918	-0.01546	-0.00999	3	-0.01154	0.00197		2.2	-0.01396	-0.01699	-0.024	3	-0.01832	0.00297
2.25	-0.01576	-0.02272	-0.02402	3	-0.02083	0.00256		2.25	-0.00859	-0.01311	-0.01702	3	-0.01291	0.00243		2.25	-0.0154	-0.01997	-0.02345	3	-0.01961	0.00233
2.3	-0.0174	-0.03218	-0.02063	3	-0.0234	0.00449		2.3	-0.01838	-0.01417	-0.01077	3	-0.01444	0.0022		2.3	-0.01686	-0.01817	-0.02719	3	-0.02074	0.00324
2.35	-0.01223	-0.01761	-0.0126	3	-0.01415	0.00174		2.35	-0.01326	-0.01002	-0.0157	3	-0.01299	0.00164		2.35	-0.01509	-0.01748	-0.01902	3	-0.0172	0.00114
2.4	-0.00145	-0.00735	-0.01752	3	-0.00877	0.00469		2.4	-0.01144	-0.00898	-0.01908	3	-0.01317	0.00304		2.4	-0.0127	-0.01999	-0.03151	3	-0.0214	0.00548
2.45	-0.0196	-0.01119	-0.01509	3	-0.01529	0.00243		2.45	-0.00839	-0.00442	-0.01681	3	-0.00987	0.00365		2.45	-0.01097	-0.0168	-0.02514	3	-0.01763	0.00411
2.5	-0.00926	-0.00586	-0.02368	3	-0.01293	0.00546		2.5	-0.00759	-0.00872	0	3	-0.00544	0.00274		2.5	-0.00779	-0.01616	-0.01927	3	-0.0144	0.00343
2.55	-0.01845	-0.01571	-0.01577	3	-0.01664	0.000902936		2.55	-0.00557	-0.00766	-0.00906	3	-0.00743	0.00102		2.55	-0.00807	-0.01667	-0.02138	3	-0.01537	0.0039
2.6	-0.01289	-0.01847	-0.0094	3	-0.01359	0.00264		2.6	-0.0114	-0.01772	-0.01799	3	-0.0157	0.00215		2.6	-0.00889	-0.01148	-0.0223	3	-0.01422	0.00411
2.65	-0.01182	-0.0216	-0.0216	3	-0.01834	0.00326		2.65	-0.00442	-0.01043	-0.00564	3	-0.00683	0.00184		2.65	-0.00965	-0.00916	-0.01892	3	-0.01258	0.00318
2.7	-0.00525	-0.01686	-0.01089	3	-0.011	0.00335		2.7	-0.00802	-0.00991	-0.00513	3	-0.00769	0.00139		2.7	-0.00561	-0.01173	-0.01146	3	-0.0096	0.00199
2.75	-0.01139	-0.02485	-0.01918	3	-0.01847	0.0039		2.75	-0.00741	-0.01021	-0.00581	3	-0.00781	0.00129		2.75	-0.00967	-0.00708	-0.00806	3	-0.00827	0.000754313
2.8	-0.01827	-0.00621	-0.00761	3	-0.0107	0.00381		2.8	-0.00794	-0.00852	-0.01032	3	-0.00893	0.000718029		2.8	-0.00387	-0.00602	-0.00984	3	-0.00658	0.00174
2.85	-0.00505	-0.01437	-0.01598	3	-0.0118	0.00341		2.85	-0.00287	-0.01297	-0.0058	3	-0.00721	0.003		2.85	-0.00127	-0.00137	-0.00604	3	-0.00289	0.00157
2.9	-0.00839	-0.01451	-0.01131	3	-0.0114	0.00177		2.9	-0.00923	-0.00274	-0.01005	3	-0.00734	0.00231		2.9	-0.00268	-0.00273	-0.00193	3	-0.00244	0.000259264
2.95	-0.01245	-0.00454	-0.0209	3	-0.01263	0.00472		2.95	-0.00482	-0.00835	-0.00999	3	-0.00772	0.00152		2.95	-0.00229	-0.00233	-0.01009	3	-0.0049	0.00259

## Sheet: Figure 4 - S2A
Cross Correlation Analysis - 0μM Glutamate
0μM Glutamate + GPT/Pyruvate (no modulator)								0μM Glutamate + GPT/Pyruvate + 5μM MNI-137								0μM Glutamate + GPT/Pyruvate + 10μM BINA
Time (s)	Rep #1	Rep #2	Rep #3	N	Mean	S.E.M.		Time (s)	Rep #1	Rep #2	Rep #3	N	Mean	S.E.M.		Time (s)	Rep #1	Rep #2	Rep #3	N	Mean	S.E.M.
0	-0.32219	-0.27212	-0.3063	3	-0.3002	0.01477		0	-0.25176	-0.23474	-0.25121	3	-0.2459	0.00558		0	-0.33543	-0.26088	-0.33075	3	-0.30902	0.02411
0.05	-0.13712	-0.13162	-0.12307	3	-0.13061	0.00409		0.05	-0.06692	-0.06943	-0.0762	3	-0.07085	0.00277		0.05	-0.19009	-0.13304	-0.19655	3	-0.17323	0.02018
0.1	-0.10495	-0.09411	-0.09146	3	-0.09684	0.00413		0.1	-0.04561	-0.04466	-0.02884	3	-0.0397	0.00544		0.1	-0.14211	-0.10567	-0.17372	3	-0.1405	0.01966
0.15	-0.08658	-0.09054	-0.08043	3	-0.08585	0.00294		0.15	-0.04508	-0.04169	-0.02404	3	-0.03694	0.00652		0.15	-0.12387	-0.09623	-0.1604	3	-0.12683	0.01858
0.2	-0.07974	-0.07749	-0.06844	3	-0.07523	0.00345		0.2	-0.03128	-0.02397	-0.02876	3	-0.028	0.00214		0.2	-0.12	-0.08058	-0.14072	3	-0.11377	0.01764
0.25	-0.08548	-0.07424	-0.06586	3	-0.07519	0.00568		0.25	-0.0352	-0.03901	-0.02277	3	-0.03232	0.0049		0.25	-0.10539	-0.08437	-0.13393	3	-0.1079	0.01436
0.3	-0.07088	-0.06641	-0.06368	3	-0.06699	0.0021		0.3	-0.02337	-0.04064	-0.03333	3	-0.03245	0.005		0.3	-0.10049	-0.07538	-0.12634	3	-0.10074	0.01471
0.35	-0.06578	-0.06728	-0.06088	3	-0.06465	0.00193		0.35	-0.02535	-0.0397	-0.03349	3	-0.03285	0.00416		0.35	-0.10004	-0.07234	-0.11763	3	-0.09667	0.01318
0.4	-0.05854	-0.06086	-0.05402	3	-0.05781	0.00201		0.4	-0.02824	-0.03618	-0.02535	3	-0.02992	0.00324		0.4	-0.09381	-0.06093	-0.11192	3	-0.08889	0.01492
0.45	-0.05603	-0.04864	-0.04164	3	-0.04877	0.00415		0.45	-0.01853	-0.02949	-0.02888	3	-0.02563	0.00356		0.45	-0.0925	-0.06596	-0.10952	3	-0.08933	0.01267
0.5	-0.06118	-0.05199	-0.05584	3	-0.05634	0.00266		0.5	-0.0193	-0.03019	-0.0201	3	-0.0232	0.0035		0.5	-0.08342	-0.05796	-0.10721	3	-0.08286	0.01422
0.55	-0.04803	-0.04572	-0.03979	3	-0.04451	0.00245		0.55	-0.01725	-0.03435	-0.0246	3	-0.0254	0.00495		0.55	-0.07829	-0.06489	-0.09551	3	-0.07956	0.00886
0.6	-0.04973	-0.04429	-0.04822	3	-0.04741	0.00162		0.6	-0.02443	-0.03418	-0.01755	3	-0.02539	0.00483		0.6	-0.08058	-0.0622	-0.08916	3	-0.07731	0.00795
0.65	-0.04223	-0.04901	-0.0481	3	-0.04645	0.00212		0.65	-0.0202	-0.03034	-0.02034	3	-0.02363	0.00336		0.65	-0.06875	-0.06092	-0.09255	3	-0.07407	0.00951
0.7	-0.04307	-0.0562	-0.04732	3	-0.04886	0.00387		0.7	-0.02162	-0.02235	-0.02686	3	-0.02361	0.00164		0.7	-0.07027	-0.05672	-0.09398	3	-0.07365	0.01089
0.75	-0.04399	-0.05155	-0.04426	3	-0.0466	0.00248		0.75	-0.01848	-0.01465	-0.02221	3	-0.01845	0.00218		0.75	-0.07028	-0.03382	-0.09682	3	-0.06697	0.01826
0.8	-0.04481	-0.04804	-0.03568	3	-0.04284	0.0037		0.8	-0.02306	-0.02464	-0.01453	3	-0.02074	0.00314		0.8	-0.06408	-0.0437	-0.07819	3	-0.06199	0.01001
0.85	-0.05176	-0.03791	-0.03709	3	-0.04225	0.00476		0.85	-0.02039	-0.03341	-0.0161	3	-0.0233	0.00521		0.85	-0.06671	-0.04205	-0.0725	3	-0.06042	0.00933
0.9	-0.04276	-0.03745	-0.04474	3	-0.04165	0.00218		0.9	-0.02206	-0.03134	-0.02226	3	-0.02522	0.00306		0.9	-0.0612	-0.03106	-0.06424	3	-0.05216	0.01059
0.95	-0.0411	-0.03301	-0.03282	3	-0.03564	0.00273		0.95	-0.02006	-0.03282	-0.01473	3	-0.02254	0.00537		0.95	-0.05961	-0.03401	-0.07704	3	-0.05689	0.0125
1	-0.04206	-0.0348	-0.03741	3	-0.03809	0.00212		1	-0.01586	-0.03449	-0.01754	3	-0.02263	0.00595		1	-0.05137	-0.04114	-0.06917	3	-0.0539	0.00819
1.05	-0.03227	-0.03899	-0.03504	3	-0.03543	0.00195		1.05	-0.00929	-0.02671	-0.01361	3	-0.01654	0.00524		1.05	-0.04859	-0.04613	-0.06597	3	-0.05356	0.00624
1.1	-0.02157	-0.03111	-0.04031	3	-0.031	0.00541		1.1	-0.01223	-0.02091	-0.01769	3	-0.01694	0.00253		1.1	-0.04246	-0.05738	-0.05558	3	-0.0518	0.0047
1.15	-0.038	-0.02782	-0.03912	3	-0.03498	0.00359		1.15	-0.01948	-0.03295	-0.02109	3	-0.0245	0.00425		1.15	-0.03789	-0.04927	-0.05592	3	-0.0477	0.00526
1.2	-0.03139	-0.04285	-0.03466	3	-0.0363	0.00341		1.2	-0.02183	-0.03144	-0.00707	3	-0.02011	0.00709		1.2	-0.03727	-0.04931	-0.05486	3	-0.04715	0.00519
1.25	-0.03816	-0.03557	-0.02488	3	-0.03287	0.00406		1.25	-0.02181	-0.03454	-0.01803	3	-0.02479	0.00499		1.25	-0.03784	-0.04307	-0.04711	3	-0.04267	0.00269
1.3	-0.02446	-0.0255	-0.03102	3	-0.02699	0.00204		1.3	-0.00992	-0.03401	-0.01429	3	-0.01941	0.00741		1.3	-0.04412	-0.04447	-0.05919	3	-0.04926	0.00497
1.35	-0.03139	-0.03339	-0.03218	3	-0.03232	0.000582349		1.35	-0.01681	-0.03025	-0.00986	3	-0.01897	0.00598		1.35	-0.03611	-0.03996	-0.04793	3	-0.04133	0.00348
1.4	-0.02901	-0.02275	-0.02619	3	-0.02598	0.00181		1.4	-0.01513	-0.0399	-0.01641	3	-0.02381	0.00805		1.4	-0.04138	-0.03062	-0.04516	3	-0.03906	0.00435
1.45	-0.02212	-0.02963	-0.02837	3	-0.02671	0.00232		1.45	-0.00556	-0.02147	-0.01776	3	-0.01493	0.00481		1.45	-0.04466	-0.03001	-0.04082	3	-0.0385	0.00439
1.5	-0.03114	-0.02565	-0.03803	3	-0.03161	0.00358		1.5	-0.01	-0.0286	-0.01231	3	-0.01697	0.00585		1.5	-0.0382	-0.02432	-0.04249	3	-0.035	0.00548
1.55	-0.02487	-0.02152	-0.03535	3	-0.02724	0.00417		1.55	-0.01131	-0.02435	-0.02804	3	-0.02123	0.00507		1.55	-0.03597	-0.03402	-0.03518	3	-0.03506	0.000564848
1.6	-0.03141	-0.01674	-0.02855	3	-0.02557	0.00449		1.6	-0.00892	-0.02109	-0.02125	3	-0.01709	0.00408		1.6	-0.03452	-0.02997	-0.03423	3	-0.03291	0.00147
1.65	-0.03617	-0.0181	-0.02357	3	-0.02595	0.00535		1.65	-0.00774	-0.01269	-0.02	3	-0.01348	0.00356		1.65	-0.03273	-0.03364	-0.03236	3	-0.03291	0.000381216
1.7	-0.03365	-0.01849	-0.02272	3	-0.02496	0.00452		1.7	-0.01603	-0.0157	-0.01107	3	-0.01427	0.0016		1.7	-0.028	-0.0273	-0.04464	3	-0.03331	0.00567
1.75	-0.02454	-0.01906	-0.02529	3	-0.02296	0.00196		1.75	-0.00955	-0.02151	-0.01724	3	-0.0161	0.0035		1.75	-0.03008	-0.03631	-0.02646	3	-0.03095	0.00288
1.8	-0.02633	-0.02119	-0.0241	3	-0.02387	0.00149		1.8	-0.00983	-0.01464	-0.00869	3	-0.01106	0.00182		1.8	-0.03669	-0.02581	-0.02357	3	-0.02869	0.00405
1.85	-0.02244	-0.01745	-0.02973	3	-0.02321	0.00357		1.85	-0.00947	-0.00988	-0.0056	3	-0.00832	0.00136		1.85	-0.03316	-0.03899	-0.03214	3	-0.03476	0.00213
1.9	-0.02034	-0.01433	-0.02992	3	-0.02153	0.00454		1.9	-0.00393	-0.01728	-0.02278	3	-0.01466	0.0056		1.9	-0.02789	-0.02418	-0.02247	3	-0.02485	0.0016
1.95	-0.01697	-0.01781	-0.0199	3	-0.01822	0.000871937		1.95	-0.01107	-0.01586	-0.01888	3	-0.01527	0.00227		1.95	-0.03008	-0.02224	-0.02488	3	-0.02573	0.0023
2	-0.02731	-0.00836	-0.02562	3	-0.02043	0.00606		2	-0.01194	-0.01029	-0.02384	3	-0.01535	0.00427		2	-0.02321	-0.0437	-0.0279	3	-0.0316	0.0062
2.05	-0.00948	-0.01104	-0.03874	3	-0.01975	0.0095		2.05	-0.01135	-0.02229	-0.00696	3	-0.01353	0.00456		2.05	-0.02389	-0.03613	-0.04046	3	-0.03349	0.00496
2.1	-0.02033	-0.0096	-0.02248	3	-0.01747	0.00398		2.1	-0.01681	-0.02957	-0.02348	3	-0.02329	0.00368		2.1	-0.0278	-0.01745	-0.02556	3	-0.02361	0.00314
2.15	-0.02033	-0.01891	-0.0252	3	-0.02148	0.00191		2.15	-0.01811	-0.01346	-0.01087	3	-0.01414	0.00212		2.15	-0.01681	-0.02502	-0.02393	3	-0.02192	0.00258
2.2	-0.00993	-0.02315	-0.02938	3	-0.02082	0.00573		2.2	-0.01577	-0.01553	-0.00784	3	-0.01305	0.00261		2.2	-0.01827	-0.02621	-0.02046	3	-0.02164	0.00237
2.25	-0.01297	-0.01029	-0.03256	3	-0.0186	0.00702		2.25	-0.01576	-0.02272	-0.02402	3	-0.02083	0.00256		2.25	-0.01646	-0.01966	-0.01436	3	-0.01683	0.00154
2.3	-0.01639	-0.01048	-0.01936	3	-0.01541	0.00261		2.3	-0.0174	-0.03218	-0.02063	3	-0.0234	0.00449		2.3	-0.01316	-0.02375	-0.02157	3	-0.01949	0.00323
2.35	-0.00721	-0.01241	-0.02335	3	-0.01432	0.00476		2.35	-0.01223	-0.01761	-0.0126	3	-0.01415	0.00174		2.35	-0.01082	-0.00826	-0.0178	3	-0.01229	0.00285
2.4	-0.01599	-0.00899	-0.03093	3	-0.01863	0.00647		2.4	-0.00145	-0.00735	-0.01752	3	-0.00877	0.00469		2.4	-0.01595	-0.01577	-0.01044	3	-0.01405	0.00181
2.45	-0.01513	-0.00795	-0.01924	3	-0.01411	0.0033		2.45	-0.0196	-0.01119	-0.01509	3	-0.01529	0.00243		2.45	-0.00643	-0.02317	-0.01517	3	-0.01492	0.00484
2.5	-0.01157	-0.000963368	-0.01807	3	-0.0102	0.00499		2.5	-0.00926	-0.00586	-0.02368	3	-0.01293	0.00546		2.5	-0.01324	-0.01746	-0.02116	3	-0.01729	0.00229
2.55	-0.01277	-0.00984	-0.03349	3	-0.0187	0.00744		2.55	-0.01845	-0.01571	-0.01577	3	-0.01664	0.000902936		2.55	-0.00714	-0.01891	-0.02116	3	-0.01573	0.00435
2.6	-0.01701	-0.0158	-0.01518	3	-0.016	0.000538714		2.6	-0.01289	-0.01847	-0.0094	3	-0.01359	0.00264		2.6	-0.01173	-0.01087	-0.01653	3	-0.01304	0.00176
2.65	-0.00554	-0.00861	-0.01734	3	-0.0105	0.00353		2.65	-0.01182	-0.0216	-0.0216	3	-0.01834	0.00326		2.65	-0.01832	-0.00798	-0.01937	3	-0.01522	0.00363
2.7	-0.02055	-0.01458	-0.01339	3	-0.01618	0.00222		2.7	-0.00525	-0.01686	-0.01089	3	-0.011	0.00335		2.7	-0.01837	-0.0111	-0.01819	3	-0.01589	0.00239
2.75	-0.01753	-0.00381	-0.02796	3	-0.01644	0.00699		2.75	-0.01139	-0.02485	-0.01918	3	-0.01847	0.0039		2.75	-0.01638	-0.00258	-0.00695	3	-0.00863	0.00407
2.8	-0.0106	-0.01654	-0.02238	3	-0.0165	0.0034		2.8	-0.01827	-0.00621	-0.00761	3	-0.0107	0.00381		2.8	-0.00726	-0.01339	-0.00441	3	-0.00835	0.00265
2.85	-0.01963	-0.00992	-0.02076	3	-0.01677	0.00344		2.85	-0.00505	-0.01437	-0.01598	3	-0.0118	0.00341		2.85	-0.00295	-0.01899	-0.01759	3	-0.01318	0.00513
2.9	-0.01159	-0.01452	-0.00402	3	-0.01004	0.00313		2.9	-0.00839	-0.01451	-0.01131	3	-0.0114	0.00177		2.9	-0.00747	-0.01627	-0.00936	3	-0.01103	0.00268
2.95	-0.01663	-0.01564	-0.01852	3	-0.01693	0.000843902		2.95	-0.01245	-0.00454	-0.0209	3	-0.01263	0.00472		2.95	-0.00496	-0.02682	-0.00991	3	-0.01389	0.00662

## Sheet: Figure 4 - S2B
Cross Correlation Analysis - 1000μM Glutamate
1000μM Glutamate (no modulator)								1000μM Glutamate + 5μM MNI-137								1000μM Glutamate + 10μM BINA
Time (s)	Rep #1	Rep #2	Rep #3	N	Mean	S.E.M.		Time (s)	Rep #1	Rep #2	Rep #3	N	Mean	S.E.M.		Time (s)	Rep #1	Rep #2	Rep #3	N	Mean	S.E.M.
0	-0.26867	-0.31561	-0.32296	3	-0.30241	0.017		0	-0.42913	-0.49283	-0.48028	3	-0.46741	0.01948		0	-0.22994	-0.22658	-0.24842	3	-0.23498	0.00679
0.05	-0.17287	-0.19161	-0.21884	3	-0.19444	0.01335		0.05	-0.30221	-0.3546	-0.33682	3	-0.33121	0.01538		0.05	-0.12123	-0.12186	-0.13532	3	-0.12614	0.00459
0.1	-0.12914	-0.13424	-0.16955	3	-0.14431	0.0127		0.1	-0.24943	-0.29048	-0.27554	3	-0.27182	0.012		0.1	-0.0985	-0.09425	-0.1156	3	-0.10278	0.00652
0.15	-0.10262	-0.12371	-0.1625	3	-0.12961	0.01753		0.15	-0.21887	-0.25299	-0.24014	3	-0.23733	0.00995		0.15	-0.08631	-0.07843	-0.09187	3	-0.08554	0.0039
0.2	-0.1042	-0.11269	-0.14162	3	-0.1195	0.01133		0.2	-0.19826	-0.22886	-0.20657	3	-0.21123	0.00914		0.2	-0.07854	-0.06701	-0.07563	3	-0.07372	0.00346
0.25	-0.09738	-0.09917	-0.13587	3	-0.11081	0.01254		0.25	-0.17512	-0.2089	-0.19163	3	-0.19189	0.00975		0.25	-0.06587	-0.05934	-0.0722	3	-0.0658	0.00371
0.3	-0.087	-0.0919	-0.13093	3	-0.10328	0.0139		0.3	-0.16196	-0.18998	-0.17542	3	-0.17578	0.00809		0.3	-0.06279	-0.05649	-0.08391	3	-0.06773	0.00829
0.35	-0.08191	-0.08836	-0.12146	3	-0.09725	0.01225		0.35	-0.14911	-0.17628	-0.16335	3	-0.16291	0.00785		0.35	-0.0648	-0.05467	-0.06818	3	-0.06255	0.00406
0.4	-0.07362	-0.08767	-0.10827	3	-0.08985	0.01006		0.4	-0.13954	-0.16776	-0.14686	3	-0.15139	0.00845		0.4	-0.05847	-0.04148	-0.06471	3	-0.05489	0.00694
0.45	-0.06517	-0.0736	-0.11162	3	-0.08347	0.01429		0.45	-0.13019	-0.15805	-0.13943	3	-0.14256	0.00819		0.45	-0.04711	-0.04365	-0.06109	3	-0.05062	0.00533
0.5	-0.06449	-0.07183	-0.09833	3	-0.07822	0.01028		0.5	-0.1175	-0.14484	-0.1297	3	-0.13068	0.00791		0.5	-0.04081	-0.04836	-0.04907	3	-0.04608	0.00264
0.55	-0.06254	-0.07034	-0.09221	3	-0.07503	0.00888		0.55	-0.10972	-0.14113	-0.12159	3	-0.12415	0.00916		0.55	-0.05085	-0.04581	-0.06575	3	-0.05414	0.00599
0.6	-0.0621	-0.06117	-0.08757	3	-0.07028	0.00865		0.6	-0.10661	-0.12966	-0.11687	3	-0.11771	0.00667		0.6	-0.03774	-0.03985	-0.05802	3	-0.0452	0.00644
0.65	-0.06281	-0.05573	-0.08594	3	-0.06816	0.00912		0.65	-0.09867	-0.12386	-0.10532	3	-0.10929	0.00754		0.65	-0.05065	-0.03251	-0.05148	3	-0.04488	0.00619
0.7	-0.05085	-0.05364	-0.06112	3	-0.0552	0.00306		0.7	-0.09241	-0.11251	-0.0991	3	-0.10134	0.00591		0.7	-0.04758	-0.03733	-0.05479	3	-0.04657	0.00507
0.75	-0.03755	-0.05275	-0.0827	3	-0.05767	0.01327		0.75	-0.088	-0.11219	-0.09838	3	-0.09952	0.00701		0.75	-0.03726	-0.03306	-0.04693	3	-0.03909	0.00411
0.8	-0.03323	-0.05318	-0.08426	3	-0.05689	0.01485		0.8	-0.08114	-0.10234	-0.09537	3	-0.09295	0.00624		0.8	-0.03682	-0.0342	-0.04471	3	-0.03858	0.00316
0.85	-0.03346	-0.04712	-0.08788	3	-0.05616	0.01635		0.85	-0.07754	-0.09411	-0.09013	3	-0.08726	0.00499		0.85	-0.03459	-0.03195	-0.04732	3	-0.03795	0.00475
0.9	-0.03368	-0.04401	-0.0932	3	-0.05696	0.01836		0.9	-0.07515	-0.09531	-0.08569	3	-0.08538	0.00582		0.9	-0.0429	-0.03364	-0.04595	3	-0.04083	0.0037
0.95	-0.04238	-0.03531	-0.09149	3	-0.05639	0.01767		0.95	-0.07176	-0.08756	-0.07881	3	-0.07938	0.00457		0.95	-0.04468	-0.03326	-0.04885	3	-0.04226	0.00466
1	-0.02832	-0.04931	-0.08907	3	-0.05557	0.01781		1	-0.06145	-0.08445	-0.07918	3	-0.07503	0.00696		1	-0.03365	-0.03066	-0.04611	3	-0.03681	0.00473
1.05	-0.02986	-0.04278	-0.07354	3	-0.04873	0.01295		1.05	-0.06034	-0.08195	-0.07411	3	-0.07213	0.00631		1.05	-0.03184	-0.04022	-0.03431	3	-0.03546	0.00249
1.1	-0.02649	-0.0505	-0.06551	3	-0.0475	0.01136		1.1	-0.05181	-0.0756	-0.06379	3	-0.06374	0.00687		1.1	-0.02842	-0.02876	-0.0329	3	-0.03003	0.00144
1.15	-0.03609	-0.04937	-0.07202	3	-0.05249	0.01049		1.15	-0.05327	-0.07186	-0.06594	3	-0.06369	0.00549		1.15	-0.03074	-0.01526	-0.03053	3	-0.02551	0.00512
1.2	-0.0349	-0.05698	-0.06231	3	-0.05139	0.00839		1.2	-0.05444	-0.06701	-0.06664	3	-0.0627	0.00413		1.2	-0.02496	-0.0303	-0.03954	3	-0.0316	0.00426
1.25	-0.02647	-0.05983	-0.0663	3	-0.05087	0.01234		1.25	-0.04922	-0.06173	-0.06224	3	-0.05773	0.00426		1.25	-0.02494	-0.01922	-0.03732	3	-0.02716	0.00534
1.3	-0.03257	-0.04531	-0.07295	3	-0.05028	0.01192		1.3	-0.04717	-0.06186	-0.05427	3	-0.05443	0.00424		1.3	-0.0281	-0.02901	-0.03789	3	-0.03167	0.00312
1.35	-0.02295	-0.0396	-0.07289	3	-0.04514	0.01468		1.35	-0.04519	-0.05314	-0.05391	3	-0.05075	0.00279		1.35	-0.02894	-0.02176	-0.04246	3	-0.03105	0.00607
1.4	-0.02538	-0.04949	-0.06518	3	-0.04668	0.01158		1.4	-0.04654	-0.0546	-0.04912	3	-0.05008	0.00238		1.4	-0.02822	-0.03061	-0.03965	3	-0.03283	0.00348
1.45	-0.0319	-0.05035	-0.06434	3	-0.04886	0.0094		1.45	-0.04154	-0.04867	-0.05199	3	-0.0474	0.00308		1.45	-0.01624	-0.02707	-0.04693	3	-0.03008	0.00898
1.5	-0.02918	-0.04323	-0.05151	3	-0.04131	0.00652		1.5	-0.0441	-0.04548	-0.04458	3	-0.04472	0.000405166		1.5	-0.01517	-0.02332	-0.0262	3	-0.02156	0.0033
1.55	-0.02995	-0.04069	-0.06106	3	-0.0439	0.00912		1.55	-0.04422	-0.04514	-0.04453	3	-0.04463	0.000268375		1.55	-0.01306	-0.01827	-0.03704	3	-0.02279	0.00728
1.6	-0.02944	-0.03299	-0.0619	3	-0.04144	0.01028		1.6	-0.04524	-0.03898	-0.0356	3	-0.03994	0.00283		1.6	-0.02314	-0.01715	-0.03293	3	-0.0244	0.0046
1.65	-0.02157	-0.03546	-0.05213	3	-0.03639	0.00884		1.65	-0.04492	-0.03677	-0.03728	3	-0.03966	0.00264		1.65	-0.0192	-0.02325	-0.03222	3	-0.02489	0.00385
1.7	-0.02399	-0.03712	-0.06698	3	-0.04269	0.01272		1.7	-0.04202	-0.039	-0.03579	3	-0.03894	0.0018		1.7	-0.01855	-0.01785	-0.03007	3	-0.02216	0.00396
1.75	-0.02937	-0.03775	-0.05267	3	-0.03993	0.00681		1.75	-0.04081	-0.03888	-0.03857	3	-0.03942	0.000699431		1.75	-0.01813	-0.02511	-0.03285	3	-0.02536	0.00425
1.8	-0.02602	-0.03345	-0.06384	3	-0.0411	0.01157		1.8	-0.03864	-0.03539	-0.04318	3	-0.03907	0.00226		1.8	-0.02088	-0.02477	-0.03423	3	-0.02663	0.00397
1.85	-0.02272	-0.03534	-0.05712	3	-0.03839	0.01005		1.85	-0.03404	-0.02886	-0.03729	3	-0.03339	0.00245		1.85	-0.01639	-0.01258	-0.02833	3	-0.0191	0.00474
1.9	-0.03283	-0.02486	-0.05353	3	-0.03707	0.00855		1.9	-0.02949	-0.03007	-0.03674	3	-0.0321	0.00233		1.9	-0.02233	-0.0264	-0.01928	3	-0.02267	0.00206
1.95	-0.02349	-0.02495	-0.04144	3	-0.02996	0.00575		1.95	-0.02773	-0.034	-0.04029	3	-0.034	0.00363		1.95	-0.01609	-0.02732	-0.01833	3	-0.02058	0.00343
2	-0.02027	-0.02233	-0.05758	3	-0.03339	0.01211		2	-0.02768	-0.02859	-0.02944	3	-0.02857	0.000506358		2	-0.01586	-0.01473	-0.02936	3	-0.01998	0.0047
2.05	-0.01414	-0.01775	-0.05878	3	-0.03022	0.01432		2.05	-0.0225	-0.02866	-0.03092	3	-0.02736	0.00252		2.05	-0.01656	-0.02399	-0.02243	3	-0.02099	0.00226
2.1	-0.00718	-0.02388	-0.05966	3	-0.03024	0.01548		2.1	-0.02548	-0.0236	-0.03453	3	-0.02787	0.00337		2.1	-0.02027	-0.01297	-0.01772	3	-0.01699	0.00214
2.15	-0.01201	-0.02123	-0.06625	3	-0.03317	0.01675		2.15	-0.02249	-0.0213	-0.02396	3	-0.02259	0.000767859		2.15	-0.01667	-0.02121	-0.01497	3	-0.01762	0.00186
2.2	-0.01294	-0.01901	-0.05471	3	-0.02889	0.01303		2.2	-0.01396	-0.01699	-0.024	3	-0.01832	0.00297		2.2	-0.01691	-0.01824	-0.02511	3	-0.02009	0.00254
2.25	-0.01031	-0.01685	-0.04791	3	-0.02502	0.0116		2.25	-0.0154	-0.01997	-0.02345	3	-0.01961	0.00233		2.25	-0.01438	-0.02281	-0.01969	3	-0.01896	0.00246
2.3	-0.01036	-0.02317	-0.04037	3	-0.02463	0.00869		2.3	-0.01686	-0.01817	-0.02719	3	-0.02074	0.00324		2.3	-0.00349	-0.01873	-0.02514	3	-0.01579	0.00642
2.35	-0.00552	-0.02568	-0.02823	3	-0.01981	0.00718		2.35	-0.01509	-0.01748	-0.01902	3	-0.0172	0.00114		2.35	-0.0114	-0.01912	-0.0124	3	-0.01431	0.00242
2.4	-0.01475	-0.03272	-0.03446	3	-0.02731	0.0063		2.4	-0.0127	-0.01999	-0.03151	3	-0.0214	0.00548		2.4	-0.0134	-0.01128	-0.01146	3	-0.01205	0.000678335
2.45	-0.0232	-0.02779	-0.03308	3	-0.02803	0.00285		2.45	-0.01097	-0.0168	-0.02514	3	-0.01763	0.00411		2.45	-0.01391	-0.01811	-0.01948	3	-0.01717	0.00167
2.5	-0.02339	-0.0341	-0.02121	3	-0.02623	0.00398		2.5	-0.00779	-0.01616	-0.01927	3	-0.0144	0.00343		2.5	-0.01304	-0.0065	-0.0119	3	-0.01048	0.00202
2.55	-0.01278	-0.02128	-0.02946	3	-0.02117	0.00482		2.55	-0.00807	-0.01667	-0.02138	3	-0.01537	0.0039		2.55	-0.01949	-0.01511	-0.02654	3	-0.02038	0.00333
2.6	-0.0106	-0.01829	-0.02667	3	-0.01852	0.00464		2.6	-0.00889	-0.01148	-0.0223	3	-0.01422	0.00411		2.6	-0.01034	-0.01435	-0.01041	3	-0.0117	0.00132
2.65	-0.00635	-0.01914	-0.04	3	-0.02183	0.00981		2.65	-0.00965	-0.00916	-0.01892	3	-0.01258	0.00318		2.65	-0.00746	-0.01862	-0.00936	3	-0.01182	0.00345
2.7	-0.01026	-0.02091	-0.03589	3	-0.02235	0.00743		2.7	-0.00561	-0.01173	-0.01146	3	-0.0096	0.00199		2.7	-0.01108	-0.02268	-0.00992	3	-0.01456	0.00407
2.75	-0.0142	-0.00295	-0.04882	3	-0.02199	0.0138		2.75	-0.00967	-0.00708	-0.00806	3	-0.00827	0.000754313		2.75	-0.01076	-0.01668	-0.01178	3	-0.01307	0.00183
2.8	-0.01267	-0.02293	-0.03241	3	-0.02267	0.0057		2.8	-0.00387	-0.00602	-0.00984	3	-0.00658	0.00174		2.8	-0.00987	-0.01972	-0.000489277	3	-0.01003	0.00555
2.85	-0.01139	-0.01275	-0.01713	3	-0.01376	0.00173		2.85	-0.00127	-0.00137	-0.00604	3	-0.00289	0.00157		2.85	-0.00798	-0.02049	-0.0044	3	-0.01096	0.00488
2.9	-0.00486	-0.00314	-0.03001	3	-0.01267	0.00868		2.9	-0.00268	-0.00273	-0.00193	3	-0.00244	0.000259264		2.9	-0.01392	-0.01763	-0.01335	3	-0.01497	0.00134
2.95	-0.01465	-0.01845	-0.04424	3	-0.02578	0.0093		2.95	-0.00229	-0.00233	-0.01009	3	-0.0049	0.00259		2.95	-0.01014	-0.01772	-0.016	3	-0.01462	0.0023
