# Supplementary material for: Conformational fingerprinting of allosteric modulators in metabotropic glutamate receptor 2
Source: eLife. 2022 Jul 1;11:e78982. doi: 10.7554/eLife.78982 (PMC9299836; doi:10.7554/eLife.78982)
Supplement: Table 1—source data 1. [file elife-78982-table1-data1.xlsx]

## Sheet: SNAP-m2
Live-cell FRET titration experiments (EC50 values)
SNAP-m2
Glutamate (N=9)	DCG-IV (N=6)	LY379268 (N=6)	(2R,4R)-APDC (N=6)	Glutamate + 10μM BINA (N=23)	Glutamate + 5μM LY487379 (N=4)	Glutamate + 0.5μM JNJ-42153605 (N=5)	Glutamate + 10μM MNI-137 (N=4)	Glutamate + 10μM Ro 64-5229 (N=3)
15.85	0.283	6.2	3.16	2.4	3.71	0.68	24.56	23.1
13.8	0.314	5.89	22.1	3.47	5.5	0.74	17.78	21.1
10.2	0.294	43.6	5.53	7.94	4.79	1.6	11.2	14.5
8.6	0.323	46.9	4.87	3.09	1.26	9.3	15.17
6.56	0.601	20.9	2.88	2.1		8.47
14.89	0.624	60.2	3.03	1.6
20.1				0.42301
8.22				0.80319
8.54				0.43514
				0.39418
				0.68666
				0.567
				0.60758
				0.37829
				0.41349
				0.6886
				0.36675
				0.38096
				0.30419
				0.35316
				0.32226
				0.3146
				0.33004
*All values are μM, except for LY379268 (nM)

## Sheet: azi-CRD
Live-cell FRET titration experiments (EC50 values)
azi-CRD
Glutamate (N=26)	DCG-IV (N=10)	LY379268 (N=20)	(2R,4R)-APDC (N=36)	Glutamate + 10μM BINA (N=10)	Glutamate + 5μM LY487379 (N=22)	Glutamate + 0.5μM JNJ-42153605 (N=10)	Glutamate + 10μM MNI-137 (N=27)	Glutamate + 10μM Ro 64-5229 (N=13)
10.9	0.89	9.03	21.1	0.776	1.577	1.32	12.5	24.49
11.9	1.36	7.75	23.4	0.86	2.032	2.63	11.8	17.865
15.2	1.6	14.3	11.5	0.709	1.999	1.51	11.4	21.33
11.6	2.08	12.2	28.4	0.502	2.512	1.78	14.1	20.845
12.7	1.53	12.7	26.2	0.812	1.259	1.32	12.7	19.952
11.1	1.47	14.3	14.8	1.76632	1.355	1.1	13.9	16.982
13.8	0.783	9.97	4.138	2.30075	1.403	9.82087	14.1	19.952
11.7	0.58	8.96	3.93061	2.9766	1.315	6.39308	14.2	14.6
10.7	0.528	10.9	3.81022	2.82007	1.489	8.13748	11.1	14.7
12	0.523	13.4	3.96077	2.33701	3.21	12.7031	14.2	11.9
11		14.5	3.72237		3.37		11.9	13.7
19.2		16	3.04481		4.09		12.6	13.9
12.8		14.4	3.05204		5.09		14.4	9.51
15.2		12.2	3.50623		3.85		14.4
11.9		11.3	2.69519		8.38		13.7
11.7		13.2	3.72795		9.26		12.3
8.38		11.7	3.80522		6.19		12.8
8.07		11.4	3.9863		9.05		18.5
8.85		10.4	4.18456		8.41		13.6
7.84		14.2	3.99457		10.2		9.42
12.3			3.64066		7.33		25.7
10.3			3.21514		4.89		14.4
9.97			3.99807				11.6
10.6			3.52079				11.2
12.6			4.5752				10.3
8.34			3.35413				22.6
			3.17161				13.3
			3.45796
			3.98878
			4.04399
			3.25979
			3.58691
			3.77816
			3.82666
			3.41169
			3.7765
*All values are μM, except for LY379268 (nM)

## Sheet: azi-ECL2
Live-cell FRET titration experiments (EC50 values)
azi-ECL2
Glutamate (N=15)	DCG-IV (N=24)	LY379268 (N=9)	(2R,4R)-APDC (N=13)	Glutamate + 10μM BINA (N=16)	Glutamate + 5μM LY487379 (N=22)	Glutamate + 0.5μM JNJ-42153605 (N=17)	Glutamate + 10μM MNI-137 (N=8)	Glutamate + 10μM Ro 64-5229 (N=5)
2.37	0.417	6.02	8.97	2.08396	2.54	2.24316	15.85	10.57
6.15	0.327	9.91	4.64	1.82503	3.83	1.58394	19	14.8
3.95	0.39	5.72	4.05	2.88144	3.91	1.38561	18.79	19.37
2.89	0.398	5.97	5.53	2.06586	2.69	2.4463	20	24.79
4.03	0.407	6.91	8.97	2.39139	3.34	3.05162	6.16	17.44
3	1.58289	28.97	10.9	4.60172	2.34	2.10708	10.23
3.47	2.07893	9.62	18.9	2.9468	2.69	2.53087	11.22
3.3	2.0455	9.94	4.32	3.11243	3.8	2.78619	13.8
3.43	1.65691	8.57	2.57	2.63882	3.57709	2.40044
9.19	1.51558		2.14	2.6641	4.58121	1.79515
3.95	1.842		6.27	3.39696	5.56442	2.2461
6.61	2.01846		6.18	3.47592	4.91292	2.0741
9.25	1.16439		3.15	1.48166	3.53712	2.01725
8.39	2.0742			1.51067	3.91877	2.87045
7.08	0.56298			1.53232	3.185	2.13118
	0.32533			1.64683	3.87516	2.33798
	0.39941				3.21255	2.10863
	0.40507				2.56212
	0.28009				3.91877
	0.44508				3.50445
	0.36599				3.85878
	0.62923				2.74998
	0.3005
	0.45917
*All values are μM, except for LY379268 (nM)
