# Supplementary material for: Conformational fingerprinting of allosteric modulators in metabotropic glutamate receptor 2
Source: eLife. 2022 Jul 1;11:e78982. doi: 10.7554/eLife.78982 (PMC9299836; doi:10.7554/eLife.78982)
Supplement: Table 2—source data 1. [file elife-78982-table2-data1.xlsx]

## Sheet: SNAP-m2
Live-cell FRET max normalization experiments
SNAP-m2
DCG-IV (N=25)	LY379268 (N=23)	(2R,4R)-APDC (N=14)	Glutamate + 10μM BINA (N=7)	Glutamate + 5μM LY487379 (N=14)	Glutamate + 0.5μM JNJ-42153605 (N=22)	Glutamate + 10μM MNI-137 (N=22)	Glutamate + 10μM Ro 64-5229 (N=35)
0.84766	1.01316	1.03479	1.02679	0.95192	1.00914	0.89279	0.87115
0.85075	0.9759	1.027	1.00733	1.09385	1.02056	0.73243	0.86179
0.84825	0.99611	1.00974	1.00374	1.06875	1.08516	0.86152	0.82895
0.80779	1.01898	1.01936	1.04211	1.05635	0.9838	0.82625	0.86667
0.86214	0.99668	1.01611	1.03017	1.08358	1.01759	0.85814	0.90504
0.833	0.9702	0.93002	1.02268	1.11388	0.97082	0.78868	0.91066
0.84714	0.99476	0.94378	1.0339	1.11133	1.02487	0.8798	0.85116
0.86117	1.03592	0.90212		1.0824	0.99186	0.87658	0.85633
0.84726	0.96203	0.91209		1.13604	1.0166	0.93166	0.87509
0.70893	0.96514	0.93327		1.06527	1.05105	0.93788	0.83561
0.74389	1.05004	0.93599		1.05918	1.02453	0.97631	0.87238
0.7381	1.03487	0.94243		1.08279	1.07244	0.99697	0.8324
0.7581	1.04878	0.93798		1.07052	1.04832	0.9621	0.84021
0.75395	1.05	0.94195		1.04954	1.05105	0.7673	0.9291
0.75988	1.01535				1.06372	0.81569	0.91104
0.74211	0.99063				1.15314	0.8149	0.90839
0.74497	1.04983				0.84681	0.76269	0.94569
0.73926	1.05688				0.97056	0.83791	0.91721
0.75359	1.05113				0.95691	0.75523	0.95483
0.75845	0.95324				0.94303	0.82272	0.95623
0.76621	0.97522				0.9794	0.92476	0.91789
0.81714	0.93348				0.95654	0.78211	0.8389
0.78043	1.10579						0.82393
0.77277							0.84002
0.74165							0.86248
							0.86342
							0.81907
							0.8934
							0.90218
							0.8522
							0.84563
							0.87458
							0.85182
							0.84044
							0.86642
*All max response values are normalized to 1mM glutamate

## Sheet: azi-CRD
Live-cell FRET max normalization experiments
azi-CRD
DCG-IV (N=19)	LY379268 (N=25)	(2R,4R)-APDC (N=13)	Glutamate + 10μM BINA (N=9)	Glutamate + 5μM LY487379 (N=19)	Glutamate + 0.5μM JNJ-42153605 (N=8)	Glutamate + 10μM MNI-137 (N=18)	Glutamate + 10μM Ro 64-5229 (N=18)
0.66252	1.15668	1.05882	1.23372	1.81793	1.82273	0.80554	0.7193
0.71403	1.20505	0.98276	1.17636	1.91165	1.42478	0.92616	0.72995
0.63679	1.00866	0.9967	1.2684	2.0283	1.5051	0.89848	0.78224
0.70615	1.12261	0.99937	1.19712	2.0534	1.41477	1.01621	0.82143
0.75586	1.39556	1.02531	1.27794	1.78004	1.23529	0.90683	0.45715
0.72699	1.07547	1.04556	1.00584	1.66667	1.12527	0.89828	0.43891
0.71889	1.10959	1.02893	0.98794	1.7268	1.26247	0.85608	0.501
0.70347	1.16058	1.01835	1.00442	1.69546	1.67407	0.84428	0.60237
0.63203	1.04239	1.04136	0.93676	1.76291		0.85187	0.47335
0.61686	1.03911	0.99263		1.41921		0.89957	0.54131
0.73778	1.01516	1.05009		1.42019		0.86051	0.67336
0.67925	1.05403	1.031		1.53846		0.82495	0.57569
0.60731	0.99004	1.03252		1		0.90147	0.48007
0.66423	1.03449			1.21457		0.91928	0.64447
0.71169	0.98787			1.34459		0.84938	0.5873
0.72762	0.98959			1.42245		0.65512	0.6273
0.65665	1.01644			1.30204		0.80319	0.49959
0.79932	1.00672			1.33226		0.76024	0.39309
0.70988	1.04151			1.28783
	1.04563
	1.00897
	0.99547
	1.0569
	1.00311
	0.99146
*All max response values are normalized to 1mM glutamate

## Sheet: azi-ECL2
Live-cell FRET max normalization experiments
azi-ECL2
DCG-IV (N=25)	LY379268 (N=22)	(2R,4R)-APDC (N=56)	Glutamate + 10μM BINA (N=14)	Glutamate + 5μM LY487379 (N=7)	Glutamate + 0.5μM JNJ-42153605 (N=13)	Glutamate + 10μM MNI-137 (N=58)	Glutamate + 10μM Ro 64-5229 (N=8)
0.75624	0.99494	1.03155	1.29333	1.52101	0.97059	0.80393	0.9633
0.63601	1.11969	0.95817	1.34387	1.04706	1.00784	0.61777	0.97222
0.63622	0.96078	1.05556	1.6701	1.03279	0.90909	1.06373	0.85
0.6668	0.99457	1.15075	1.45131	0.96356	1.00488	0.98899	0.73333
0.61402	0.95228	1.13043	1.5485	1.4084	0.97172	1.10804	0.70624
0.83697	0.96503	1.08501	1.47825	1.19266	1.01987	1.11314	0.84678
0.67403	0.99761	1.12473	2.00958	1.55757	0.96525	1.16981	0.98873
0.68321	1.04985	1.21401	1.52778		0.96716	1.22391	0.62883
0.74007	1.06294	1.08955	1.75035		0.96585	1.23993
0.62101	1.01689	1.2454	1.26906		0.87426	1.252
0.89969	1.16019	0.9798	1.08621		0.94722	0.73596
0.84627	1.09964	1.06127	1.25731		1.16495	0.63605
0.55337	1.53783	1.03704	1.07026		1.05425	0.80593
0.55339	1.08321	1.1296	1.14281			0.75697
0.55336	1.3913	1.04107				0.78092
0.62696	1.03259	1.14749				0.76567
0.49369	1.4421	1.01087				0.70096
0.57285	1.29664	1.03524				0.79257
0.56676	1.20816	0.98004				0.62814
0.56698	1.45397	1.00958				0.50985
0.53374	1.22291	1.00687				0.68607
0.53797	1.04239	0.98012				0.79354
0.61985		0.99744				0.71273
0.59984		1.02291				0.68208
0.58152		1.04334				0.61827
		0.98573				0.75764
		0.99625				0.66778
		1.00129				0.68723
		0.99027				0.6865
		0.97156				0.66592
		0.97992				0.57922
		0.9779				0.68548
		0.98542				0.7059
		1.10917				0.64267
		1.04034				0.7674
		1.05193				0.99707
		1.0473				0.72253
		1.0615				0.7437
		1.00555				0.80491
		1.08623				0.82313
		1.01629				0.83234
		1.02584				0.82183
		1.00219				0.77705
		1.13848				0.71773
		1.06047				0.79177
		1.02069				0.74497
		1.02764				0.77733
		1.03577				0.69771
		0.99042				0.74802
		1.06336				0.69113
		1.07168				0.82481
		1.03531				0.79769
		1.01438				0.00927
		1.07406				0.75255
		1.04123				0.77903
		1.10941				0.89029
						0.72389
						0.68862
*All max response values are normalized to 1mM glutamate
