# Supplementary material for: Conformational fingerprinting of allosteric modulators in metabotropic glutamate receptor 2
Source: eLife. 2022 Jul 1;11:e78982. doi: 10.7554/eLife.78982 (PMC9299836; doi:10.7554/eLife.78982)
Supplement: Table 3—source data 1. [file elife-78982-table3-data1.xlsx]

## Sheet: Sheet1
smFRET state occupancy
Modulator	Glut (μM)	Rep. (#)	State 1	State 2	State 3	State 4	Total
None	0	1	0.31604	0.60322	0.05698	0.02376	1
None	0	2	0.30939	0.57934	0.11127	0	1
None	0	3	0.45659	0.51321	0.0302	0	1
None	15	1	0.00151	0.22299	0.28728	0.48822	1
None	15	2	0.01863	0.19801	0.27945	0.5039	1
None	15	3	0.03782	0.40996	0.33023	0.22199	1
None	1000	1	0.00874	0.10008	0.27026	0.62092	1
None	1000	2	0.000612	0.07687	0.35353	0.56899	1
None	1000	3	0.00991	0.0583	0.31013	0.62166	1
10μM BINA	0	1	0.32371	0.5961	0.06008	0.0201	1
10μM BINA	0	2	0.33571	0.44059	0.1642	0.0595	1
10μM BINA	0	3	0.25639	0.52312	0.22049	0	1
10μM BINA	15	1	0.0018	0.11476	0.22112	0.66231	1
10μM BINA	15	2	0.02805	0.08453	0.48825	0.39916	1
10μM BINA	15	3	0.01287	0.13721	0.30073	0.54918	1
10μM BINA	1000	1	0.00372	0.0491	0.20168	0.7455	1
10μM BINA	1000	2	0	0.04081	0.20088	0.75831	1
10μM BINA	1000	3	0.00516	0.02262	0.25116	0.72106	1
5μM MNI-137	0	1	0.73751	0.21489	0.02888	0.01872	1
5μM MNI-137	0	2	0.72064	0.24748	0.03188	0	1
5μM MNI-137	0	3	0.78769	0.20357	0.000371	0.00838	1
5μM MNI-137	15	1	0.05966	0.78286	0.13303	0.02445	1
5μM MNI-137	15	2	0.14561	0.729	0.1073	0.01809	1
5μM MNI-137	15	3	0.10634	0.73625	0.14139	0.01602	1
5μM MNI-137	1000	1	0.00193	0.61046	0.2669	0.1207	1
5μM MNI-137	1000	2	0.0005	0.54027	0.36377	0.09545	1
5μM MNI-137	1000	3	0.0038	0.52838	0.36225	0.10558	1
